# Supplementary material for: Silver-mediated synthesis of 1,4-dihydropyridine sulfones via [4 + 2] cyclization of N-allenylsulfonamides and enaminones with a 1,3-sulfonyl shift
Source: Royal Society of Chemistry journal article supplement (doi:10.1039/d3qo01681a), 2023-11-14

# Supporting Information for

## Silver-Mediated Synthesis of 1,4-Dihydropyridine Sulfones *via* [4+2] Cyclization of *N*-Allenylsulfonamides and Enaminones with 1,3-Sulfonyl Shift

Shuguang Zhou<sup>a</sup>, Shuang-Feng Dong<sup>a</sup>, Xin Zhang<sup>a</sup>, Shen-Yuan Zhang<sup>c</sup>, Teck-Peng Loh<sup>b,d\*</sup> and Jie-Sheng Tian<sup>a\*</sup>

<sup>[a]</sup>School of Chemistry and Chemical Engineering, Northwestern Polytechnical University (NPU), Xi'an 710072, China. E-mail: tjs@nwpu.edu.cn

<sup>[b]</sup>College of Advanced Interdisciplinary Science and Technology, Henan University of Technology, Zhengzhou, 450001, China.

<sup>[c]</sup>School of Chemistry and Molecular Engineering, Nanjing Tech University (NanjingTech), Nanjing 211816, China.

<sup>[d]</sup>School of Chemistry, Chemical Engineering and Biotechnology (CCEB), Nanyang Technological University, Singapore 637371. E-mail: teckpeng@ntu.edu.sg

### Table of Contents

|                                                                                                                                                                            |     |
|----------------------------------------------------------------------------------------------------------------------------------------------------------------------------|-----|
| 1. General Information                                                                                                                                                     | S2  |
| 2. General Experimental Procedure for [4+2] Cyclization of<br><i>N</i> -Allenylsulfonamides and Enaminones with 1,3-Sulfonyl Shift towards<br>1,4-Dihydropyridine Sulfones | S2  |
| 3. Characterization Data for 1,4-Dihydropyridine Sulfones                                                                                                                  | S3  |
| 4. X-Ray Diffraction Analysis of <b>3a</b>                                                                                                                                 | S18 |
| 5. Practical Utilities                                                                                                                                                     | S20 |
| 6. Control Experiment                                                                                                                                                      | S25 |
| 7. References                                                                                                                                                              | S26 |
| 8. <sup>1</sup> H and <sup>13</sup> C NMR spectra                                                                                                                          | S27 |

## **1. General Information**

### **Materials:**

All reagents and solvents were purchased from commercial sources and used without further purification unless otherwise stated. All chemicals were obtained from local suppliers or synthesized. The preparation of enaminones<sup>[1]</sup> and *N*-allenylsulfonamides<sup>[2-3]</sup> according to the previous procedures.

### **Methods:**

All reactions beyond room temperature (r.t.) were run in oil baths with the temperature calibrated with a thermometer. Prior to an experiment, the oil bath was allowed to equilibrate to the desired temperature for 15 min. <sup>1</sup>H, <sup>13</sup>C, spectra were recorded in CDCl<sub>3</sub> (with tetramethylsilane as internal standard) solution on Bruker AVANCE 400 MHz spectrometer or Bruker AVANCE 500 MHz spectrometer. The following notations were used: br-broad, s-singlet, d-doublet, t-triplet, q-quartet, m-multiplet, dd-doublet of doublet, dt-doublet of triplet, td-triplet of doublet, ddd-doublet of doublet of doublet. HRMS spectra were recorded on a waters Q-TOF premier spectrometer.

## **2. General Experimental Procedure for [4+2] Cyclization of *N*-Allenylsulfonamides and Enaminones with 1,3-Sulfonyl Shift towards 1,4-Dihydropyridine Sulfones**

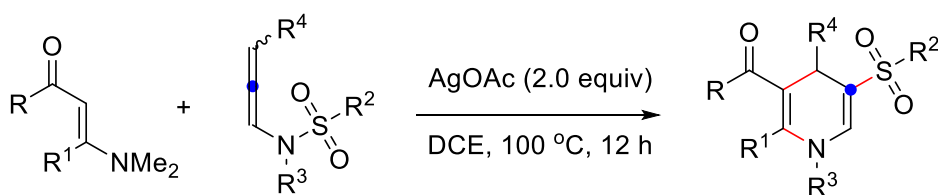

To a 10 mL Schlenk flask equipped with magnetic stir bar was added enaminones (0.5

mmol), *N*-tosylallenamides (0.75 mmol, 1.5 equiv), AgOAc (1.0 mmol, 2.0 equiv). After the DCE (2 mL) was injected into the test tube *via* syringe. The reaction mixture was allowed to stir at 100 °C for 24 h, during which time a constant checking by TLC was performed. Once the reaction proceeded to a desired degree, the resulting reaction mixture was mixed with a small amount of silica gel and concentrated. The crude product was purified by flash column chromatography on silica gel with PE/EtOAc as the eluent to afford the yellow solid.

### 3. Characterization Data for 1,4-Dihydropyridine Sulfones

#### (1-methyl-5-tosyl-1,4-dihydropyridin-3-yl)(phenyl)methanone (3a)

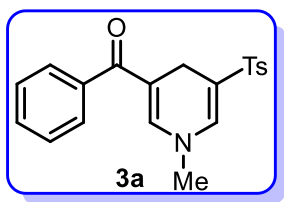

This compound was prepared by the general procedure described above.

Flash chromatography: PE/EA (5:1)

The title compound was obtained as a yellow solid, Yield = 88% (155.81 mg). **<sup>1</sup>H NMR (400 MHz, CDCl<sub>3</sub>)** δ 7.77 (d, *J* = 7.6 Hz, 2H), 7.47 – 7.42 (m, 3H), 7.39 (t, *J* = 7.7 Hz, 2H), 7.33 (d, *J* = 8.0 Hz, 2H), 7.01 (s, 1H), 6.57 (s, 1H), 3.23 (s, 2H), 3.09 (s, 3H), 2.43 (s, 3H). **<sup>13</sup>C NMR (101 MHz, CDCl<sub>3</sub>)** δ 194.25, 144.78, 144.38, 139.21, 136.87, 135.91, 130.96, 130.06, 128.55, 128.46, 128.27, 115.79, 113.42, 41.73, 21.83, 20.88.

**HRMS (ESI, *m/z*):** Calcd. for C<sub>20</sub>H<sub>19</sub>NO<sub>3</sub>S: [M+H]<sup>+</sup>, 354.1164. Found: *m/z* 354.1162.

#### (1-methyl-5-tosyl-1,4-dihydropyridin-3-yl)(*o*-tolyl)methanone (3b):

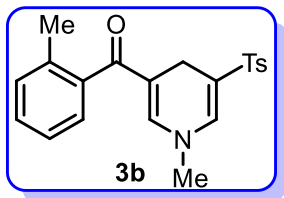

This compound was prepared by the general procedure described above.

Flash chromatography: PE/EA (4:1)

The title compound was obtained as a yellow solid, Yield = 69% (127.01 mg). **<sup>1</sup>H NMR (400 MHz, CDCl<sub>3</sub>)** δ 7.81 – 7.76 (m, 1H), 7.35 (d, *J* = 8.5 Hz, 1H), 7.31 – 7.27 (m, 1H), 7.22 – 7.13 (m, 1H), 7.07 (s, 1H), 7.00 (s, 1H), 6.35 (s, 1H), 3.24 (s, 1H), 3.05 (s, 1H), 2.46 – 2.44 (m, 1H), 2.21 (s, 1H). **<sup>13</sup>C NMR (101 MHz, CDCl<sub>3</sub>)** δ 195.94, 145.10, 144.45, 139.09, 136.75, 135.87, 135.79, 130.99, 130.10, 129.48, 128.33, 127.37, 125.40, 116.25, 114.65, 41.71, 21.88, 20.42, 19.57.

**HRMS (ESI, *m/z*):** Calcd. for C<sub>21</sub>H<sub>21</sub>FNO<sub>3</sub>S: [M+H]<sup>+</sup>, 368.1320. Found: *m/z* 368.1319.

**(2-fluorophenyl)(1-methyl-5-tosyl-1,4-dihydropyridin-3-yl)methanone (3c):**

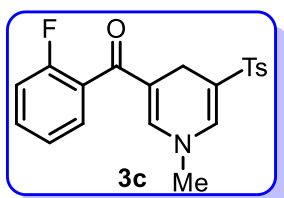

This compound was prepared by the general procedure described above.

Flash chromatography: PE/EA (4:1)

The title compound was obtained as a yellow solid, Yield = 53% (98.61 mg). **<sup>1</sup>H NMR (400 MHz, CDCl<sub>3</sub>)** δ 7.77 (d, *J* = 8.0 Hz, 2H), 7.43 – 7.37 (m, 1H), 7.34 (d, *J* = 8.0 Hz, 1H), 7.28 – 7.24 (m, 1H), 7.17 (dt, *J* = 7.5, 0.9 Hz, 1H), 7.07 (dd, *J* = 13.2, 4.7 Hz, 1H), 7.00 (s, 1H), 6.45 (s, 1H), 3.23 (s, 2H), 3.09 (s, 3H), 2.44 (s, 3H).

**$^{13}\text{C}$  NMR (101 MHz,  $\text{CDCl}_3$ )**  $\delta$  189.96, 159.1(d,  $J = 249.7$  Hz), 145.45, 144.50, 136.68, 135.62, 131.87 (d,  $J = 7.9$  Hz), 130.08, 129.93, 128.27, 124.48, 116.51, 116.31 (d,  $J = 21.9$  Hz), 114.23, 41.81, 21.85, 20.51.

**HRMS (ESI,  $m/z$ ):** Calcd. for  $\text{C}_{20}\text{H}_{18}\text{FNO}_3\text{S}$ :  $[\text{M}+\text{H}]^+$ , 372.1070. Found:  $m/z$  372.1068.

**(1-methyl-5-tosyl-1,4-dihydropyridin-3-yl)(m-tolyl)methanone (3d):**

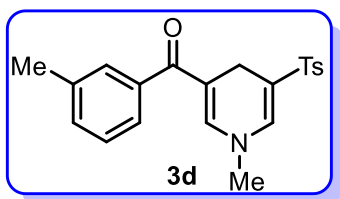

This compound was prepared by the general procedure described above.

Flash chromatography: PE/EA (3:1)

The title compound was obtained as a yellow solid, Yield = 62% (114.12 mg) .  **$^1\text{H}$  NMR (400 MHz,  $\text{CDCl}_3$ )**  $\delta$  7.78 (d,  $J = 8.1$  Hz, 2H), 7.33 (d,  $J = 8.1$  Hz, 2H), 7.29 – 7.23 (m, 3H), 7.23 – 7.17 (m, 1H), 7.02 (s, 1H), 6.58 (s, 1H), 3.23 (s, 2H), 3.09 (s, 3H), 2.43 (s, 3H), 2.36 (s, 3H).  **$^{13}\text{C}$  NMR (101 MHz,  $\text{CDCl}_3$ )**  $\delta$  194.49, 144.74, 144.33, 139.19, 138.48, 136.91, 135.84, 131.66, 130.01, 128.93, 128.25, 128.21, 125.50, 115.60, 113.38, 41.70, 21.81, 21.57, 20.81.

**HRMS (ESI,  $m/z$ ):** Calcd. for  $\text{C}_{21}\text{H}_{21}\text{NO}_3\text{S}$ :  $[\text{M}+\text{H}]^+$ , 368.1320. Found:  $m/z$  368.1318.

**(3-fluorophenyl)(1-methyl-5-tosyl-1,4-dihydropyridin-3-yl)methanone (3e):**

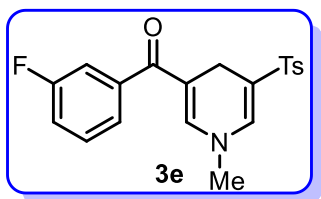

This compound was prepared by the general procedure described above.

Flash chromatography: PE/EA (4:1)

The title compound was obtained as a yellow solid, Yield = 71% (132.10 mg). **<sup>1</sup>H NMR (400 MHz, CDCl<sub>3</sub>)** δ 7.76 (d, *J* = 8.3 Hz, 2H), 7.35 (ddd, *J* = 14.0, 8.7, 4.3 Hz, 3H), 7.21 (dt, *J* = 7.5, 1.1 Hz, 1H), 7.17 – 7.10 (m, 2H), 7.01 (d, *J* = 0.8 Hz, 1H), 6.57 (d, *J* = 0.7 Hz, 1H), 3.21 (s, 2H), 3.11 (s, 3H), 2.43 (s, 3H). **<sup>13</sup>C NMR (101 MHz, CDCl<sub>3</sub>)** δ 192.57 (d, *J* = 2.1 Hz), 163.83, 161.36, 145.06, 144.47, 141.20 (d, *J* = 6.4 Hz), 136.73, 135.72, 130.42, 129.97, 128.26, 124.11 (d, *J* = 3.1 Hz), 118.02, 117.80, 116.13, 115.57, 115.35, 113.02, 41.81, 21.83, 20.79. **HRMS (ESI, *m/z*):** Calcd. for C<sub>20</sub>H<sub>18</sub>FNO<sub>3</sub>S: [M+H]<sup>+</sup>, 372.1069. Found: *m/z* 372.1066.

**(1-methyl-5-tosyl-1,4-dihydropyridin-3-yl)(p-tolyl)methanone (3f):**

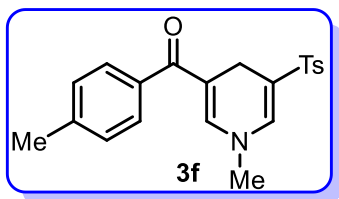

This compound was prepared by the general procedure described above.

Flash chromatography: PE/EA (4:1)

The title compound was obtained as a yellow solid, Yield = 85% (156.46 mg). **<sup>1</sup>H NMR (400 MHz, CDCl<sub>3</sub>)** δ 7.76 (d, *J* = 8.2 Hz, 2H), 7.34 (dd, *J* = 12.5, 8.1 Hz, 4H), 7.18 (d, *J* = 7.9 Hz, 2H), 7.01 (s, 1H), 6.58 (s, 1H), 3.22 (s, 2H), 3.08 (s, 3H), 2.42 (s, 3H), 2.37 (s, 3H). **<sup>13</sup>C NMR (101 MHz, CDCl<sub>3</sub>)** δ 194.92, 144.26, 141.02, 137.09, 135.82, 129.96, 128.10, 115.03, 114.02, 41.63, 24.75, 21.78, 20.37.

**HRMS (ESI, *m/z*):** Calcd. for C<sub>21</sub>H<sub>21</sub>NO<sub>3</sub>S: [M+H]<sup>+</sup>, 368.1320. Found: *m/z* 368.1319.

**(4-methoxyphenyl)(1-methyl-5-tosyl-1,4-dihydropyridin-3-yl)methanone (3g):**

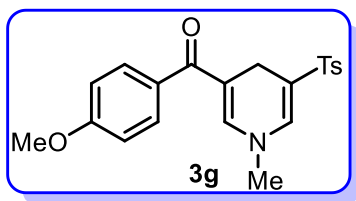

This compound was prepared by the general procedure described above.

Flash chromatography: PE/EA (3:1)

The title compound was obtained as a yellow solid, Yield = 92% (176.70 mg). **<sup>1</sup>H NMR (400 MHz, CDCl<sub>3</sub>)** δ 7.76 (d, *J* = 8.2 Hz, 2H), 7.48 – 7.42 (m, 2H), 7.32 (d, *J* = 8.1 Hz, 2H), 7.01 (s, 1H), 6.89 (d, *J* = 8.7 Hz, 2H), 6.58 (s, 1H), 3.83 (s, 3H), 3.22 (s, 2H), 3.10 (s, 3H), 2.42 (s, 3H). **<sup>13</sup>C NMR (101 MHz, CDCl<sub>3</sub>)** δ 193.29, 162.12, 144.33, 143.81, 137.01, 135.93, 131.57, 130.67, 130.05, 128.26, 115.26, 113.83, 113.44, 55.64, 41.69, 21.85, 21.09.

**HRMS (ESI, *m/z*):** Calcd. for C<sub>21</sub>H<sub>21</sub>NO<sub>4</sub>S: [M+H]<sup>+</sup>, 384.1269. Found: *m/z* 384.1267.

**(4-fluorophenyl)(1-methyl-5-tosyl-1,4-dihydropyridin-3-yl)methanone (3h):**

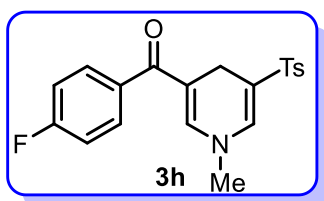

This compound was prepared by the general procedure described above.

Flash chromatography: PE/EA (4:1)

The title compound was obtained as a yellow solid, Yield = 76% (141.40 mg). **<sup>1</sup>H NMR (400 MHz, CDCl<sub>3</sub>)** δ 7.75 (d, *J* = 8.0 Hz, 2H), 7.45 (dd, *J* = 8.2, 5.6 Hz, 2H), 7.31 (d, *J* = 8.0 Hz, 2H), 7.05 (t, *J* = 8.5 Hz, 2H), 7.00 (s, 1H), 6.55 (s, 1H), 3.20 (s, 2H), 3.10 (s, 3H), 2.41 (s,

3H).  $^{13}\text{C}$  NMR (101 MHz,  $\text{CDCl}_3$ )  $\delta$  192.79, 165.62, 163.12, 144.63, 144.39, 136.87, 135.77, 135.23, 135.19, 130.77, 130.68, 130.01, 128.17, 115.70, 115.66, 115.49, 113.11, 41.72, 21.78, 20.86.

**HRMS (ESI,  $m/z$ ):** Calcd. for  $\text{C}_{20}\text{H}_{18}\text{FNO}_3\text{S}$ :  $[\text{M}+\text{H}]^+$ , 372.1069. Found:  $m/z$  372.1069.

**(4-chlorophenyl)(1-methyl-5-tosyl-1,4-dihydropyridin-3-yl)methanone (3i):**

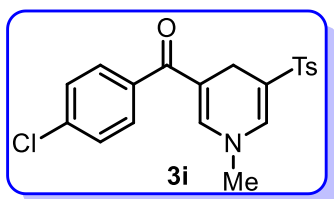

This compound was prepared by the general procedure described above.

Flash chromatography: PE/EA (4:1)

The title compound was obtained as a yellow solid, Yield = 81% (157.17 mg).  $^1\text{H}$  NMR (400 MHz,  $\text{CDCl}_3$ )  $\delta$  7.76 (d,  $J$  = 8.3 Hz, 2H), 7.41 – 7.34 (m, 4H), 7.33 (d,  $J$  = 8.1 Hz, 2H), 7.01 (s, 1H), 6.54 (s, 1H), 3.21 (s, 2H), 3.11 (s, 3H), 2.43 (s, 3H).  $^{13}\text{C}$  NMR (101 MHz,  $\text{CDCl}_3$ )  $\delta$  192.89, 144.79, 144.45, 137.45, 137.15, 136.77, 135.76, 130.06, 129.88, 128.83, 128.25, 115.99, 113.19, 41.78, 21.83, 20.84.

**HRMS (ESI,  $m/z$ ):** Calcd. for  $\text{C}_{20}\text{H}_{18}\text{ClINO}_3\text{S}$ :  $[\text{M}+\text{H}]^+$ , 388.0774. Found:  $m/z$  388.0772.

**(4-bromophenyl)(1-methyl-5-tosyl-1,4-dihydropyridin-3-yl)methanone (3j):**

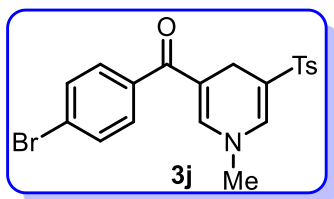

This compound was prepared by the general procedure described above.



Flash chromatography: PE/EA (3:1)

The title compound was obtained as a yellow solid, Yield = 63% (136.09 mg). **<sup>1</sup>H NMR (400 MHz, CDCl<sub>3</sub>)** δ 7.76 (d, *J* = 8.2 Hz, 2H), 7.53 (d, *J* = 8.3 Hz, 2H), 7.32 (t, *J* = 7.3 Hz, 4H), 7.01 (s, 1H), 6.54 (s, 1H), 3.21 (s, 2H), 3.11 (s, 3H), 2.43 (s, 3H). **<sup>13</sup>C NMR (101 MHz, CDCl<sub>3</sub>)** δ 192.97, 144.82, 144.46, 137.91, 136.73, 135.75, 131.80, 130.07, 130.06, 128.26, 125.54, 116.07, 113.20, 41.79, 21.84, 20.84.

**HRMS (ESI, *m/z*):** Calcd. for C<sub>20</sub>H<sub>18</sub> NO<sub>3</sub>BrS: [M+H]<sup>+</sup>, 432.0269. Found: *m/z* 432.0268.

#### 4-(1-methyl-5-tosyl-1,4-dihydropyridine-3-carbonyl)benzonitrile (3k):

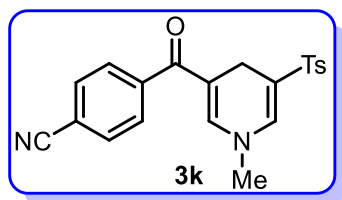

This compound was prepared by the general procedure described above.

Flash chromatography: PE/EA (2:1)

The title compound was obtained as a yellow solid, Yield = 48% (90.99 mg). **<sup>1</sup>H NMR (400 MHz, CDCl<sub>3</sub>)** δ 7.74 (d, *J* = 8.0 Hz, 2H), 7.70 (d, *J* = 8.4 Hz, 2H), 7.52 (d, *J* = 8.4 Hz, 2H), 7.35 (d, *J* = 8.0 Hz, 2H), 7.02 (s, 1H), 6.49 (s, 1H), 3.22 (s, 2H), 3.12 (s, 3H), 2.44 (s, 3H). **<sup>13</sup>C NMR (101 MHz, CDCl<sub>3</sub>)** δ 192.21, 145.50, 144.65, 143.16, 136.46, 135.49, 132.48, 130.13, 128.93, 128.32, 118.30, 116.78, 114.43, 113.04, 41.92, 21.89, 20.71.

**HRMS (ESI, *m/z*):** Calcd. for C<sub>21</sub>H<sub>18</sub> N<sub>2</sub>O<sub>3</sub>: [M+H]<sup>+</sup>, 379.1116. Found: *m/z* 379.1113.

#### (1-methyl-5-tosyl-1,4-dihydropyridin-3-yl)(naphthalen-2-yl)methanone (3l):

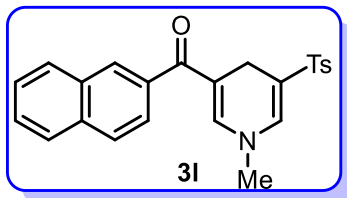

This compound was prepared by the general procedure described above.

Flash chromatography: PE/EA (4:1)

The title compound was obtained as a yellow solid, Yield =81% (163.67 mg). **<sup>1</sup>H NMR (400 MHz, CDCl<sub>3</sub>)** δ 7.93 – 7.85 (m, 4H), 7.80 (d, *J* = 7.8 Hz, 2H), 7.58 – 7.52 (m, 3H), 7.35 (d, *J* = 7.8 Hz, 2H), 7.04 (s, 1H), 6.64 (s, 1H), 3.30 (s, 2H), 3.09 (s, 3H), 2.45 (s, 3H). **<sup>13</sup>C NMR (101 MHz, CDCl<sub>3</sub>)** <sup>13</sup>C NMR (101 MHz, ) δ 194.28, 144.90, 144.43, 136.88, 136.50, 135.87, 134.56, 132.55, 130.10, 128.98, 128.66, 128.61, 128.33, 128.04, 127.76, 127.03, 125.49, 115.90, 113.70, 41.76, 21.88, 20.99.

**HRMS (ESI, *m/z*):** Calcd. for C<sub>24</sub>H<sub>21</sub>NO<sub>3</sub>S: [M+H]<sup>+</sup>, 404.1320. Found: *m/z* 404.1317.

#### Furan-2-yl(1-methyl-5-tosyl-1,4-dihydropyridin-3-yl)methanone (3m):

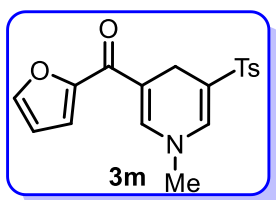

This compound was prepared by the general procedure described above.

Flash chromatography: PE/EA (5:1)

The title compound was obtained as a yellow solid, Yield =54% (92.91 mg). **<sup>1</sup>H NMR (400 MHz, CDCl<sub>3</sub>)** δ 7.77 – 7.76 (m, 2H), 7.54 – 7.53 (m, 1H), 7.41 (dd, *J* = 3.7, 1.2 Hz, 1H), 7.34 – 7.32 (m, 2H), 7.08 – 7.05 (m, 1H), 7.02 (d, *J* = 0.8, 1H), 6.96 – 6.95 (m, 1H), 3.24 (s, 1H), 3.17 (s, 1H), 2.43 (s, 1H). **<sup>13</sup>C NMR (101 MHz, CDCl<sub>3</sub>)** δ 184.79, 144.41, 142.90,

137.01, 135.86, 131.47, 130.93, 130.07, 128.24, 127.51, 115.36, 113.34, 99.74, 41.79, 21.85, 21.27.

**HRMS (ESI, m/z):** Calcd. for C<sub>18</sub>H<sub>17</sub>NO<sub>4</sub>S: [M+H]<sup>+</sup>, 344.0956. Found: *m/z* 344.0955.

**(1-methyl-5-tosyl-1,4-dihydropyridin-3-yl)(thiophen-2-yl)methanone (3n):**

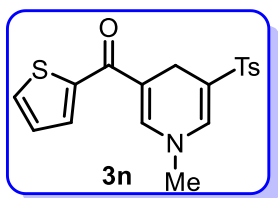

This compound was prepared by the general procedure described above.

Flash chromatography: PE/EA (4:1)

The title compound was obtained as a yellow solid, Yield = 69% (124.22 mg). **<sup>1</sup>H NMR (400 MHz, CDCl<sub>3</sub>)** δ 7.76 (d, *J* = 8.4 Hz, 2H), 7.51-7.50 (m, 1H), 7.46-7.45 (m, 1H), 7.33-7.30 (m, 2H), 7.08-7.06 (m, 1H), 7.02 (s, 1H), 3.22 (s, 3H), 3.21 (s, 2H), 2.42 (s, 3H). **<sup>13</sup>C NMR (101 MHz, CDCl<sub>3</sub>)** δ 178.66, 153.26, 145.05, 144.34, 143.10, 136.84, 135.86, 130.02, 128.20, 117.06, 115.52, 112.33, 112.02, 41.92, 21.82, 20.84.

**HRMS (ESI, m/z):** Calcd. for C<sub>18</sub>H<sub>17</sub>NO<sub>3</sub>S<sub>2</sub>: [M+H]<sup>+</sup>, 360.0728. Found: *m/z* 360.0727.

**(1-methyl-5-tosyl-1,4-dihydropyridin-3-yl)(naphthalen-2-yl)methanone (3o)**

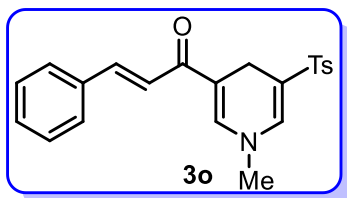

This compound was prepared by the general procedure described above.

Flash chromatography: PE/EA (6:1)

The title compound was obtained as a yellow solid, Yield = 43% (81.73 mg). **<sup>1</sup>H NMR (500 MHz, CDCl<sub>3</sub>)** δ 7.77 (d, *J* = 7.4 Hz, 2H), 7.62 – 7.51 (m, 3H), 7.37 (s, 3H), 7.32 (d, *J* = 7.3 Hz, 2H), 7.02 (t, *J* = 16.2 Hz, 3H), 3.21 (s, 5H), 2.42 (s, 3H). **<sup>13</sup>C NMR (101 MHz, CDCl<sub>3</sub>)** δ 186.58, 144.32, 141.85, 140.58, 137.05, 135.85, 135.28, 130.19, 130.01, 129.03, 128.28, 128.15, 120.32, 115.40, 114.93, 41.78, 21.80, 20.85.

**HRMS (ESI, *m/z*):** Calcd. for C<sub>22</sub>H<sub>21</sub>NO<sub>3</sub>S: [M+H]<sup>+</sup>, 380.1320. Found: *m/z* 380.1320.

### 1-(1-methyl-5-tosyl-1,4-dihydropyridin-3-yl)ethan-1-one (3p):

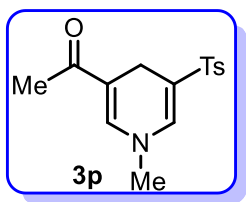

This compound was prepared by the general procedure described above.

Flash chromatography: PE/EA (5:1)

The title compound was obtained as a yellow solid, Yield = 52% (75.95 mg). **<sup>1</sup>H NMR (400 MHz, CDCl<sub>3</sub>)** δ 7.72 (d, *J* = 8.0 Hz, 2H), 7.29 (d, *J* = 7.9 Hz, 2H), 6.98 (s, 1H), 6.79 (s, 1H), 3.16 (s, 3H), 3.02 (s, 2H), 2.40 (s, 3H), 2.15 (s, 3H). **<sup>13</sup>C NMR (101 MHz, CDCl<sub>3</sub>)** δ 194.91, 144.29, 140.93, 137.08, 135.88, 130.00, 128.17, 115.20, 114.13, 41.66, 24.79, 21.82, 20.44.

**HRMS (ESI, *m/z*):** Calcd. for C<sub>15</sub>H<sub>17</sub>NO<sub>3</sub>S: [M+H]<sup>+</sup>, 292.1007. Found: *m/z* 292.1003.

### 1-methyl-3-tosyl-4,6,7,8-tetrahydroquinolin-5(1H)-one (3q):

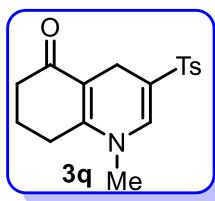

This compound was prepared by the general procedure described above.

Flash chromatography: PE/EA (5:1)

The title compound was obtained as a yellow solid, Yield = 40% (63.62 mg). **<sup>1</sup>H NMR (400 MHz, CDCl<sub>3</sub>)** δ 7.74 (d, *J* = 8.3 Hz, 2H), 7.29 (d, *J* = 8.0 Hz, 2H), 7.01 (s, 1H), 3.18 (s, 3H), 3.05 (s, 2H), 2.43 (t, *J* = 6.1 Hz, 2H), 2.41 (s, 3H), 2.35 – 2.28 (m, 2H), 1.99 – 1.91 (m, 2H). **<sup>13</sup>C NMR (101 MHz, CDCl<sub>3</sub>)** δ 196.11, 153.26, 144.19, 138.65, 135.99, 129.95, 128.17, 114.92, 109.82, 38.94, 36.02, 25.77, 21.82, 21.08, 20.17.

**HRMS (ESI, *m/z*):** Calcd. for C<sub>17</sub>H<sub>19</sub>NO<sub>3</sub>S: [M+H]<sup>+</sup>, 318.1164. Found: *m/z* 318.1161.

**(1-benzyl-5-tosyl-1,4-dihydropyridin-3-yl)(phenyl)methanone (3r):**

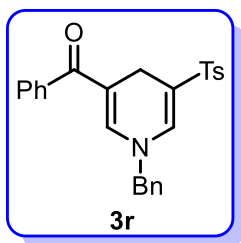

This compound was prepared by the general procedure described above.

Flash chromatography: PE/EA (6:1)

The title compound was obtained as a yellow solid, Yield = 73% (157.00 mg). **<sup>1</sup>H NMR (400 MHz, CDCl<sub>3</sub>)** δ 7.76 (d, *J* = 8.2 Hz, 2H), 7.43 – 7.29 (m, 10H), 7.20 – 7.15 (m, 2H), 7.13 (s, 1H), 6.67 (s, 1H), 4.42 (s, 2H), 3.27 (s, 2H), 2.44 (s, 3H). **<sup>13</sup>C NMR (101 MHz, CDCl<sub>3</sub>)** δ 194.26, 144.42, 144.07, 138.92, 136.33, 135.77, 135.41, 131.11, 130.07, 129.51, 128.86, 128.59, 128.49, 128.32, 127.44, 127.43, 127.41, 116.13, 113.56, 58.28, 21.86, 21.22.

**HRMS (ESI, *m/z*):** Calcd. for C<sub>26</sub>H<sub>23</sub>NO<sub>3</sub>S: [M+H]<sup>+</sup>, 430.1477. Found: *m/z* 430.1476.

**(1-benzyl-5-(naphthalen-2-ylsulfonyl)-1,4-dihydropyridin-3-yl)(phenyl)methanone (3s):**

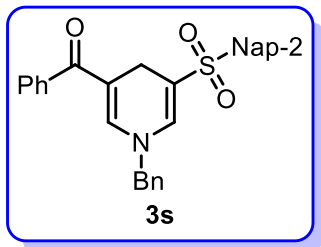

This compound was prepared by the general procedure described above.

Flash chromatography: PE/EA (5:1)

The title compound was obtained as a yellow solid, Yield = 78% (181.80 mg). **<sup>1</sup>H NMR (400 MHz, CDCl<sub>3</sub>)** δ 8.50 (d, *J* = 1.6, 1H), 8.01 – 7.96 (m, 2H), 7.91 (d, *J* = 8.0, 1H), 7.81-7.79 (m, 1H), 7.67-7.60 (m, 2H), 7.42-7.28 (m, 8H), 7.23 (s, 1H), 7.19-7.17 (m, 2H), 6.67 (d, *J* = 1.2, 1H), 4.44 (s, 2H), 3.32 (s, 2H). **<sup>13</sup>C NMR (101 MHz, CDCl<sub>3</sub>)** δ 194.16, 143.97, 138.83, 136.99, 135.60, 135.39, 135.30, 132.36, 131.06, 130.10, 129.74, 129.65, 129.46, 128.81, 128.51, 128.43, 128.07, 127.77, 127.40, 122.84, 115.67, 113.60, 58.25, 21.23.

**HRMS (ESI, *m/z*):** Calcd. for C<sub>29</sub>H<sub>23</sub>NO<sub>3</sub>S: [M+H]<sup>+</sup>, 466.1477. Found: *m/z* 466.1474.

**(1-benzyl-5-(methylsulfonyl)-1,4-dihydropyridin-3-yl)(phenyl)methanone (3t):**

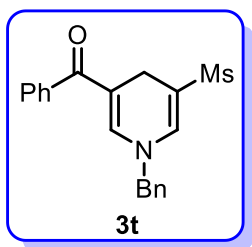

This compound was prepared by the general procedure described above.

Flash chromatography: PE/EA (5:1)

The title compound was obtained as a yellow solid, Yield = 70% (123.94 mg). **<sup>1</sup>H NMR (400 MHz, CDCl<sub>3</sub>)** δ 7.47 – 7.43 (m, 3H), 7.40 – 7.35 (m, 5H), 7.19-7.17 (m, 2H), 6.98 (d, *J* = 1.2 Hz, 1H), 6.75 (t, *J* = 0.8 Hz, 1H), 4.42 (s, 2H), 3.55 (s, 2H), 2.93 (s, 2H). **<sup>13</sup>C NMR (101**

**MHz, CDCl<sub>3</sub>)**  $\delta$  194.23, 144.21, 138.83, 137.38, 135.27, 131.29, 129.56, 128.96, 128.66, 128.59, 127.52, 115.02, 113.55, 58.34, 40.11, 21.75.

**HRMS (ESI, m/z):** Calcd. for C<sub>20</sub>H<sub>19</sub>NO<sub>3</sub>S: [M+H]<sup>+</sup>, 354.1164. Found: *m/z* 354.1163.

**5-benzoyl-1-benzyl-*N,N*-dimethyl-1,4-dihydropyridine-3-sulfonamide (3u):**

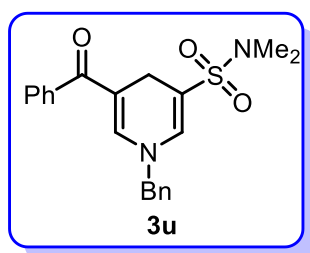

This compound was prepared by the general procedure described above.

Flash chromatography: PE/EA (3:1)

The title compound was obtained as a yellow solid, Yield = 56% (107.28 mg). **<sup>1</sup>H NMR (400 MHz, CDCl<sub>3</sub>)**  $\delta$  7.46 – 7.43 (m, 3H), 7.39 – 7.34 (m, 5H), 7.19-7.16 (m, 2H), 6.85 (s, 1H), 6.75 (s, 1H), 4.40 (s, 2H), 3.42 (s, 2H), 2.86 (s, 6H). **<sup>13</sup>C NMR (101 MHz, CDCl<sub>3</sub>)**  $\delta$  194.29, 144.62, 139.03, 136.86, 135.52, 131.10, 129.47, 128.80, 128.62, 128.52, 127.34, 113.28, 113.10, 58.20, 37.63, 21.96.

**HRMS (ESI, m/z):** Calcd. for C<sub>21</sub>H<sub>22</sub> N<sub>2</sub>O<sub>3</sub>S: [M+H]<sup>+</sup>, 383.1429. Found: *m/z* 383.1427.

**(1-(4-methoxybenzyl)-5-tosyl-1,4-dihydropyridin-3-yl)(phenyl)methanone (3v):**

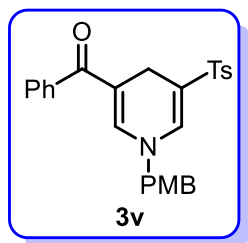

This compound was prepared by the general procedure described above.

Flash chromatography: PE/EA (4:1)

The title compound was obtained as a yellow solid, Yield = 66% (151.52mg). **<sup>1</sup>H NMR (500 MHz, CDCl<sub>3</sub>)** δ 7.76 (d, *J* = 8.3 Hz, 2H), 7.46-7.41 (m, 1H), 7.38-7.31 (m, 6H), 7.13 -7.07 (m, 3H), 6.93-6.88 (m, 2H), 6.66 (d, *J* = 1.1 Hz, 1H), 4.35 (s, 2H), 3.83 (s, 3H), 3.26 (s, 2H), 2.44 (s, 3H). **<sup>13</sup>C NMR (126 MHz, CDCl<sub>3</sub>)** δ 194.22, 160.11, 144.38, 143.99, 139.04, 136.23, 135.90, 131.06, 130.07, 129.05, 128.61, 128.48, 128.33, 127.24, 116.07, 114.89, 113.48, 57.91, 55.64, 21.85, 21.31.

HRMS (ESI, *m/z*): Calcd. for C<sub>27</sub>H<sub>25</sub>NO<sub>4</sub>S: [M+H]<sup>+</sup>, 460.1577. Found: *m/z* 460.1557.

**Phenyl(5-tosyl-1-(2,2,2-trifluoroethyl)-1,4-dihydropyridin-3-yl)methanone (3w):**

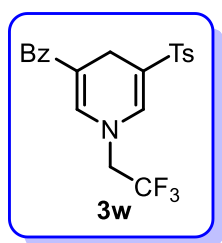

This compound was prepared by the general procedure described above.

Flash chromatography: PE/EA (4:1)

The title compound was obtained as a yellow solid, Yield = 67% (141.40 mg). **<sup>1</sup>H NMR (400 MHz, CDCl<sub>3</sub>)** δ 7.78 (d, *J* = 8.4 Hz, 2H), 7.49 – 7.46 (m, 3H), 7.43 – 7.39 (m, 3H), 7.36 (d, *J* = 8.8 Hz, 2H), 7.08 (s, 1H), 6.61 (s, 1H), 3.77 (q, *J* = 8.4 Hz, 2H), 3.24 (s, 2H), 2.45 (s, 3H). **<sup>13</sup>C NMR (101 MHz, CDCl<sub>3</sub>)** δ 194.26, 144.78, 142.80, 138.48, 135.65, 135.39, 131.54, 130.20, 128.70, 128.63, 128.39, 117.73, 115.05, 21.88, 20.80.

HRMS (ESI, *m/z*): Calcd. for C<sub>21</sub>H<sub>18</sub>F<sub>3</sub>NO<sub>3</sub>S: [M+H]<sup>+</sup>, 422.1038/. Found: *m/z* 422.1034.

**(S)-phenyl(1-(1-phenylethyl)-5-tosyl-1,4-dihydropyridin-3-yl)methanone (3x):**



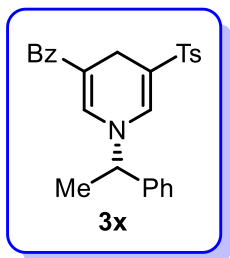

This compound was prepared by the general procedure described above.

Flash chromatography: PE/EA (5:1)

The title compound was obtained as a yellow solid, Yield = 80% (177.67 mg). **<sup>1</sup>H NMR (400 MHz, CDCl<sub>3</sub>)** δ 7.75 (d, *J* = 8.0 Hz, 2H), 7.42 – 7.37 (m, 4H), 7.33 (d, *J* = 8.0 Hz, 2H), 7.30 – 7.29 (m, 4H), 7.22 – 7.19 (m, 3H), 6.69 (s, 1H), 4.62 – 4.57 (q, *J* = 6.8 Hz, 1H), 3.27 (s, 2H), 2.43 (s, 3H), 1.61 (d, *J* = 6.8 Hz, 3H). **<sup>13</sup>C NMR (101 MHz, CDCl<sub>3</sub>)** δ 194.23, 144.35, 142.65, 139.46, 138.92, 135.86, 134.95, 131.06, 130.06, 129.42, 128.76, 128.59, 128.44, 128.32, 126.69, 126.68, 115.89, 113.38, 62.45, 21.86, 21.66, 19.83.

**HRMS (ESI, *m/z*):** Calcd. for C<sub>27</sub>H<sub>25</sub>NO<sub>3</sub>S: [M+H]<sup>+</sup>, 444.1633. Found: *m/z* 444.1633.

### Phenyl(1-phenyl-5-tosyl-1,4-dihydropyridin-3-yl)methanone (3y):

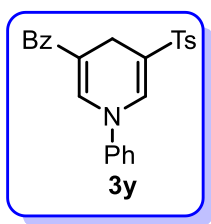

This compound was prepared by the general procedure described above.

Flash chromatography: PE/EA (3:1)

The title compound was obtained as a yellow solid, Yield = 71% (147.73 mg). **<sup>1</sup>H NMR (400 MHz, CDCl<sub>3</sub>)** δ 7.82 (d, *J* = 8.3 Hz, 2H), 7.51 (dd, *J* = 6.7, 1.5 Hz, 3H), 7.48 – 7.45 (m, 1H), 7.42 – 7.35 (m, 6H), 7.29 – 7.24 (m, 1H), 7.13 – 7.08 (m, 3H), 3.37 (s, 2H), 2.45 (s, 3H). **<sup>13</sup>C**

**NMR (101 MHz, CDCl<sub>3</sub>)**  $\delta$  194.62, 144.61, 142.74, 142.09, 138.77, 135.55, 134.78, 131.32, 130.25, 130.12, 128.65, 128.54, 128.37, 127.06, 120.94, 118.01, 115.10, 21.85, 21.38.

**HRMS (ESI, m/z):** Calcd. for C<sub>25</sub>H<sub>21</sub>NO<sub>3</sub>S: [M+H]<sup>+</sup>, 416.1320. Found: *m/z* 416.1319.

**(1,4-dimethyl-5-tosyl-1,4-dihydropyridin-3-yl)(phenyl)methanone (3z):**

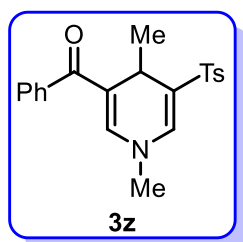

This compound was prepared by the general procedure described above.

Flash chromatography: PE/EA (6:1)

The title compound was obtained as a yellow solid, Yield = 21% (38.65 mg). **<sup>1</sup>H NMR (500 MHz, CDCl<sub>3</sub>)**  $\delta$  7.80 (d, *J* = 7.8 Hz, 2H), 7.44 (d, *J* = 7.6 Hz, 3H), 7.37 (t, *J* = 7.4 Hz, 2H), 7.31 (d, *J* = 7.8 Hz, 2H), 7.16 (s, 1H), 6.60 (s, 1H), 3.85 (q, *J* = 6.4 Hz, 1H), 3.18 (s, 3H), 2.42 (s, 3H), 1.08 (d, *J* = 6.4 Hz, 3H). **<sup>13</sup>C NMR (126 MHz, CDCl<sub>3</sub>)**  $\delta$  194.13, 144.19, 143.39, 139.56, 137.98, 137.80, 130.99, 130.05, 128.45, 128.43, 128.03, 119.88, 118.82, 41.96, 26.19, 23.38, 21.83.

**HRMS (ESI, m/z):** Calcd. for C<sub>21</sub>H<sub>21</sub>NO<sub>3</sub>S: [M+H]<sup>+</sup>, 368.1320. Found: *m/z* 368.1317.

#### 4. X-Ray Diffraction Analysis of 3a

|                   |                                                   |  |
|-------------------|---------------------------------------------------|--|
| Empirical formula | C <sub>20</sub> H <sub>19</sub> NO <sub>3</sub> S |  |
| Formula weight    | 353.42                                            |  |

|                                   |                                    |                  |
|-----------------------------------|------------------------------------|------------------|
| Temperature                       | 298(2)                             |                  |
| Wavelength                        | 0.71073 Å                          |                  |
| Crystal system                    | Monoclinic                         |                  |
| Space group                       | C2/c                               |                  |
| Unit cell dimensions              | a= 27.711(2)Å                      | Alpha=90.00°     |
|                                   | b=9.4240(9)Å                       | Beta=123.253(3)° |
|                                   | c=16.1661(14)Å                     | Gamma=90.00°     |
| Volume                            | 3530.4(5)                          |                  |
| Z                                 | 8                                  |                  |
| Density (calculated)              | 1.330 mg/m <sup>3</sup>            |                  |
| Absorption coefficient            | 0.202 mm <sup>-1</sup>             |                  |
| F(000)                            | 1488                               |                  |
| Crystal size                      | 0.43 x 0.28 x 0.21 mm <sup>3</sup> |                  |
| Theta range for data collection   | 2.33 to 25.02°                     |                  |
| Index ranges                      | -26<=h<=32, -11<=k<=9, -19<=l<=13  |                  |
| Absorption correction             | multi-scan                         |                  |
| Max. and min. transmission        | 0.9588 and 0.9182                  |                  |
| Data / restraints / parameters    | 3118 / 0 / 228                     |                  |
| Goodness-of-fit on F <sup>2</sup> | 1.042                              |                  |
| Final R indices [I>2sigma(I)]     | R1=0.0417                          | wR2=0.0923       |
| R indices (all data)              | R1=0.0788                          | wR2=0.1092       |

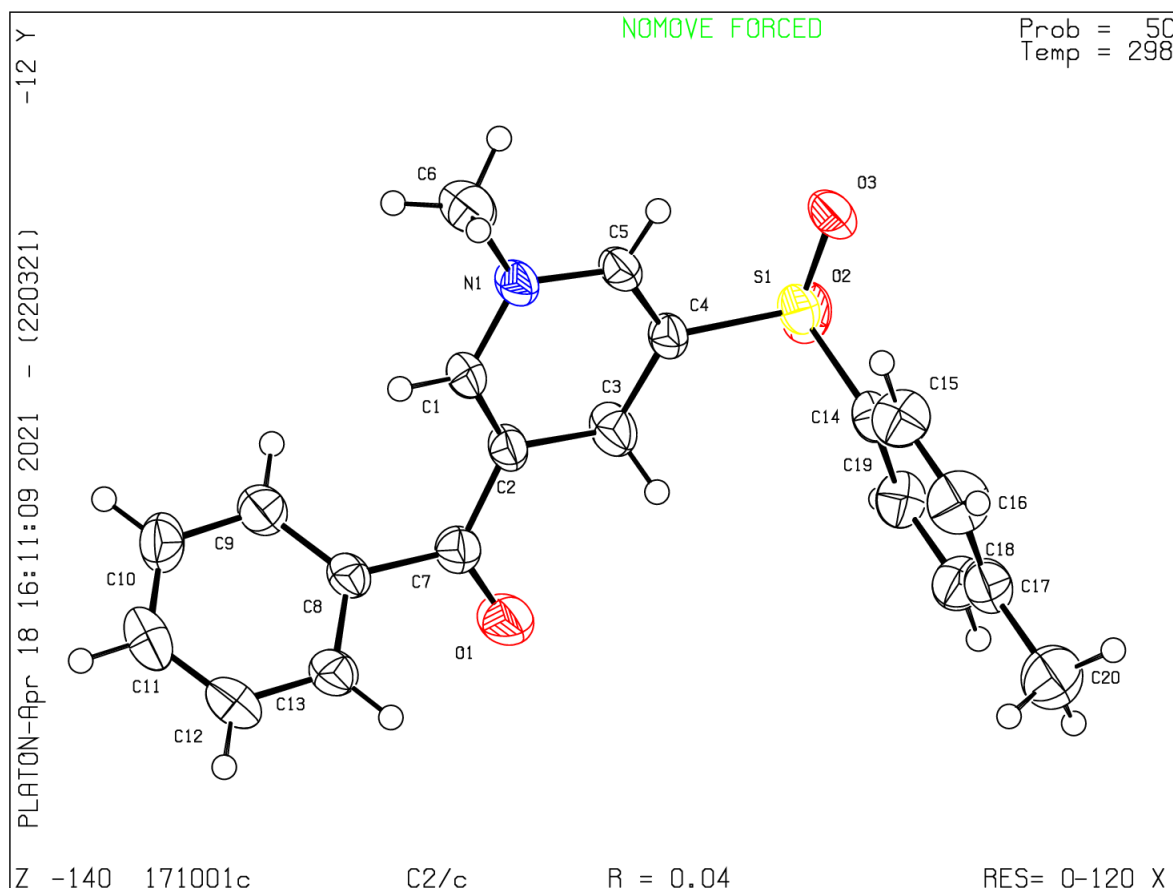

Figure S1. ORTEP drawing of **3a** showing 30% probability thermal ellipsoids.

## 5. Practical Utilities

### 5.1 3.0 mmol scale reaction for **3r** and **3v**

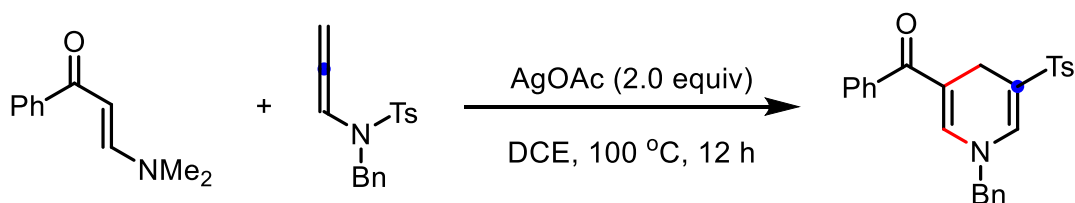

To a 25 mL Schlenk flask equipped with magnetic stir bar was added (E)-3-(dimethylamino)-1-phenylprop-2-en-1-one **1a** (3.0 mmol, 0.53 g), N-benzyl-4-methyl-N-(propa-1,2-dien-1-yl) benzenesulfonamide **3r** (4.5 mmol, 1.34 g, 1.5 equiv), AgOAc (6.0 mmol, 1.0 g, 2.0 equiv). After the DCE (10 mL) was injected into the test tube *via* syringe.

The reaction mixture was allowed to stir at 100 °C for 24 h, during which time a constant checking by TLC was performed. Once the reaction proceeded to a desired degree, the resulting reaction mixture was mixed with a small amount of silica gel and concentrated. The crude product was purified by flash column chromatography on silica gel with PE/EtOAc as the eluent to afford the yellow solid **3r**.

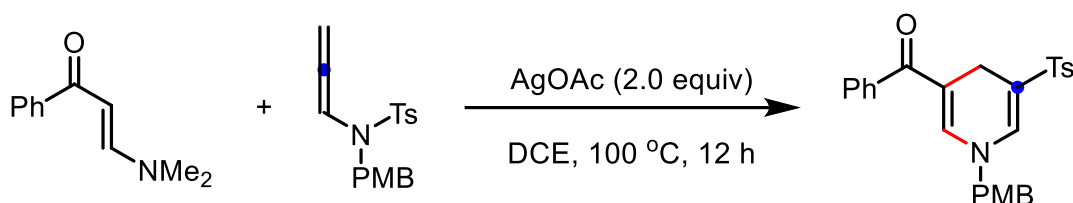

To a 25 mL Schlenk flask equipped with magnetic stir bar was added (*E*)-3-(dimethylamino)-1-phenylprop-2-en-1-one **1a** (3.0 mmol, 0.53 g), *N*-(4-methoxy-benzyl)-4-methyl-*N*-(propa-1,2-dien-1-yl) benzenesulfonamide **3v** (4.5 mmol, 1.48 g, 1.5 equiv),  $\text{AgOAc}$  (6.0 mmol, 1.0 g, 2.0 equiv). After the DCE (10 mL) was injected into the test tube via syringe. The reaction mixture was allowed to stir at 100 °C for 24 h, during which time a constant checking by TLC was performed. Once the reaction proceeded to a desired degree, the resulting reaction mixture was mixed with a small amount of silica gel and concentrated. The crude product was purified by flash column chromatography on silica gel with PE/EtOAc as the eluent to afford the yellow solid **3v**.

## 5.2 Diversification of **3r** and **3v** <sup>[4-7]</sup>

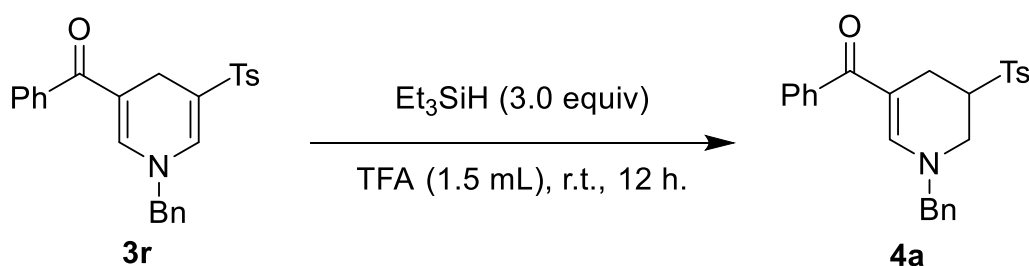

Typical procedure for the transformation of **3r** to **4a**: To a 10 mL Schlenk flask equipped with magnetic stir bar was added **3r** (0.5 mmol, 214.5 mg), Et<sub>3</sub>SiH (3.0 equiv). After the TFA (1.5 mL) was injected into the test tube via syringe. The reaction mixture was allowed to stir at r.t. for 12 h, during which time a constant checking by TLC was performed. Once the reaction proceeded to a desired degree, the resulting reaction mixture was mixed with a small amount of silica gel and concentrated. The crude product was purified by flash column chromatography on silica gel with PE/EtOAc as the eluent to afford the yellow solid **4a**.

**(1-benzyl-5-tosyl-1,4,5,6-tetrahydropyridin-3-yl)(phenyl)methanone (4a):**

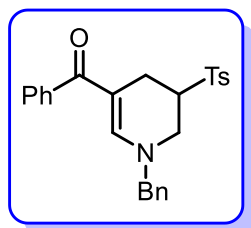

The title compound was obtained as a yellow solid in 82% yield. Flash chromatography: PE/EA (6:1). **<sup>1</sup>H NMR (500 MHz, CDCl<sub>3</sub>)** δ 7.73 (d, *J* = 8.2 Hz, 2H), 7.39 – 7.28 (m, 10H), 7.14 – 7.06 (m, 3H), 4.25 (q, *J* = 15.0 Hz, 2H), 3.58 – 3.46 (m, 1H), 3.42 – 3.28 (m, 2H), 2.93 – 2.83 (m, 1H), 2.58 – 2.47 (m, 1H), 2.41 (s, 3H). **<sup>13</sup>C NMR (126 MHz, CDCl<sub>3</sub>)** δ 192.76, 151.08, 145.38, 140.23, 135.09, 133.95, 130.05, 129.86, 129.11, 128.91, 128.45, 128.22, 128.10, 127.59, 105.54, 60.16, 57.54, 44.14, 21.68, 20.79.

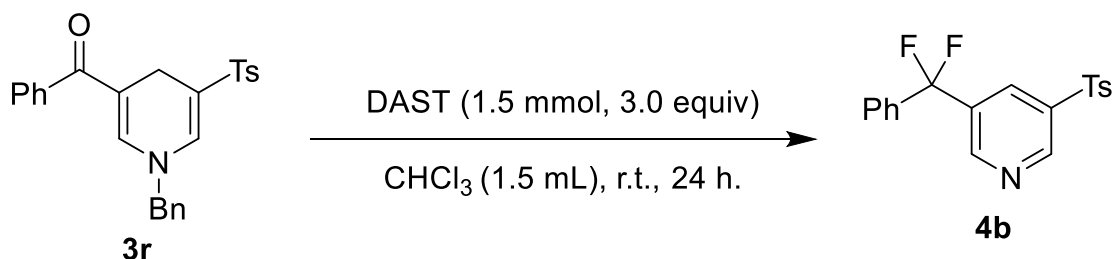

Typical procedure for the transformation of **3r** to **4b**: To a 10 mL Schlenk flask equipped with magnetic stir bar was added **3r** (0.5 mmol, 214.5 mg), DAST (1.5 mmol, 3.0 equiv) via a syringe in CHCl<sub>3</sub> (1.5 mL). The reaction mixture was allowed to stir at r.t. for 24 h, during

which time a constant checking by TLC was performed. Once the reaction proceeded to a desired degree, the resulting reaction mixture was mixed with a small amount of silica gel and concentrated. The crude product was purified by flash column chromatography on silica gel with PE/EtOAc as the eluent to afford the yellow solid **4b**.

### 3-(difluoro(phenyl)methyl)-5-tosylpyridine (**4b**):

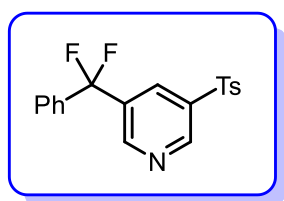

The title compound was obtained as a yellow solid in 56% yield. Flash chromatography: PE/EA (15:1). **<sup>1</sup>H NMR (500 MHz, CDCl<sub>3</sub>)** δ 9.14 (d, *J* = 2.0 Hz, 1H), 8.88 -8.79 (m, 1H), 8.35 (t, *J* = 2.1 Hz, 1H), 7.84 (d, *J* = 8.3 Hz, 2H), 7.50-7.41 (m, 5H), 7.35 (d, *J* = 8.0 Hz, 2H), 2.42 (s, 3H).

**<sup>13</sup>C NMR (126 MHz, CDCl<sub>3</sub>)** δ 151.20 (t, *J* = 5.4 Hz), 149.96, 145.63, 138.94, 137.43, 135.89, 135.67, 135.45, 134.75, 134.51, 134.26, 132.59 (t, *J* = 5.2 Hz), 131.03, 130.60, 129.15, 128.18, 125.74 (t, *J* = 5.6 Hz), 121.22, 119.28, 117.34, 21.86.

**<sup>19</sup>F NMR (471 MHz, CDCl<sub>3</sub>)** δ -89.60.

**HRMS (ESI, *m/z*):** Calcd. for C<sub>19</sub>H<sub>15</sub>F<sub>2</sub>NO<sub>2</sub>S: [M+H]<sup>+</sup>, 360.0864. Found: *m/z* 360.0853.

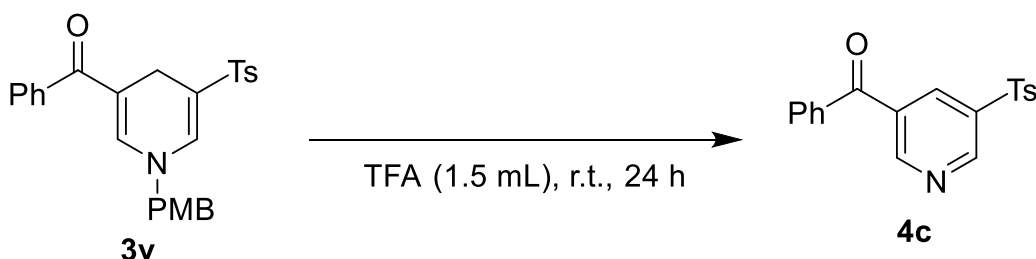

Typical procedure for the transformation of **3v** to **4c**: To a 10 mL Schlenk flask equipped with magnetic stir bar was added **3v** (0.5 mmol, 229.6 mg), TFA (1.5 mL), the reaction mixture was allowed to stir at r.t. for 24 h, during which time a constant checking by TLC was performed. Once the reaction proceeded to a desired degree, the resulting reaction

mixture was mixed with a small amount of silica gel and concentrated. The crude product was purified by flash column chromatography on silica gel with PE/EtOAc as the eluent to afford the yellow solid **4c**.

#### Phenyl(5-tosylpyridin-3-yl)methanone(**4c**):

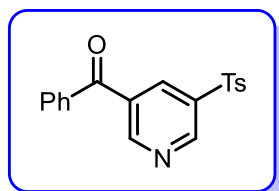

The title compound was obtained as a yellow solid in 79% yield. Flash chromatography: PE/EA (10:1). **<sup>1</sup>H NMR (500 MHz, CDCl<sub>3</sub>)**  $\delta$  9.27 (d,  $J$  = 1.9 Hz, 1H), 9.08 (s, 1H), 8.55 (t,  $J$  = 2.1 Hz, 1H), 7.85 (d,  $J$  = 8.3 Hz, 2H), 7.79-7.72 (m, 2H), 7.69-7.58 (m, 1H), 7.52 (t,  $J$  = 7.8 Hz, 2H), 7.34 (d,  $J$  = 8.0 Hz, 2H), 2.41 (s, 3H).

**<sup>13</sup>C NMR (126 MHz, CDCl<sub>3</sub>)**  $\delta$  193.07, 154.07, 151.10, 145.64, 139.05, 137.40, 136.20, 135.96, 134.05, 133.56, 130.59, 130.19, 129.11, 128.19, 21.84.

**HRMS (ESI, m/z):** Calcd. for C<sub>19</sub>H<sub>15</sub>NO<sub>3</sub>S: [M+H]<sup>+</sup>, 338.0845. Found:  $m/z$  338.0835.

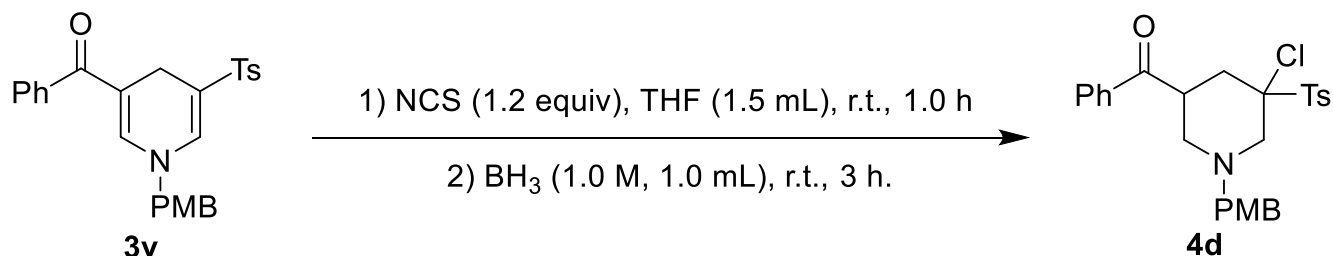

Typical procedure for the transformation of **3v** to **4d**: To a 10 mL Schlenk flask equipped with magnetic stir bar was added **3v** (0.5 mmol, 229.6 mg), NCS (0.6 mmol, 1.2 equiv) in THF (1.5 mL) in air at r.t. for 1.0 h, then BH<sub>3</sub> (1.0 M, 1.0 mL) in air at r.t. for 3 h, during which time a constant checking by TLC was performed. Once the reaction proceeded to a desired degree, the resulting reaction mixture was mixed with a small amount of silica gel and concentrated. The crude product was purified by flash column chromatography on silica



gel with PE/EtOAc as the eluent to afford the yellow solid **4d**.

**(5-chloro-1-(4-methoxybenzyl)-5-tosylpiperidin-3-yl)(phenyl)methanone(4d):**

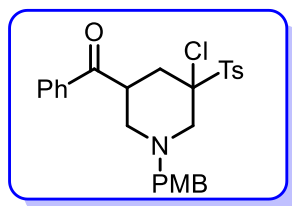

The title compound was obtained as a yellow solid in 67% yield. Flash chromatography: PE/EA (10:1).  $^1\text{H}$  NMR (500 MHz,  $\text{CDCl}_3$ )  $\delta$  8.01

(d,  $J = 8.1$  Hz, 2H), 7.72 (d,  $J = 7.8$  Hz, 2H), 7.59 (dd,  $J = 10.7$ , 4.1 Hz, 1H), 7.49 (t,  $J = 7.6$  Hz, 2H), 7.32 (d,  $J = 8.2$  Hz, 2H), 7.22 (d,  $J = 7.9$  Hz, 2H), 6.94-6.87 (m, 2H), 4.63 (ddd,  $J = 11.7$ , 7.9, 4.1 Hz, 1H), 3.84 (s, 3H), 3.62 (d,  $J = 13.0$  Hz, 1H), 3.42 (dd,  $J = 18.3$ , 13.2 Hz, 2H), 3.22 (d,  $J = 9.1$  Hz, 1H), 3.00 (dd,  $J = 14.7$ , 1.8 Hz, 1H), 2.50 (d,  $J = 13.1$  Hz, 1H), 2.43 (d,  $J = 12.7$  Hz, 3H), 2.29 (dt,  $J = 22.7$ , 12.8 Hz, 2H).

$^{13}\text{C}$  NMR (126 MHz,  $\text{CDCl}_3$ )  $\delta$  199.97, 159.33, 145.66, 135.65, 133.82, 131.46, 131.22, 130.71, 129.50, 129.11, 128.77, 114.03, 81.94, 61.85, 60.78, 55.51, 55.19, 42.56, 36.63, 21.92.

HRMS (ESI,  $m/z$ ): Calcd. for  $\text{C}_{27}\text{H}_{28}\text{NO}_4\text{ClS}$ :  $[\text{M}+\text{H}]^+$ , 498.1500. Found:  $m/z$  498.1486.

## 6. Control Experiment

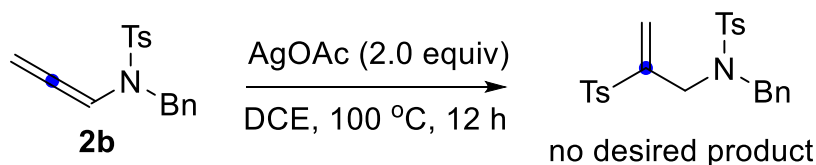

To a 10 mL schlenk flask equipped with magnetic stir bar was added *N*-benzyl-4-methyl-*N*-(propa-1,2-dien-1-yl) benzenesulfonamide **3r** (0.5 mmol, 0.15 g), AgOAc (1.0 mmol, 0.17 g, 2.0 equiv). After the DCE (1.0 mL) was injected into the test tube *via* syringe. The

reaction mixture was allowed to stir at 100 °C for 12 h, during which time a constant checking by TLC was performed.

## **7. References**

- [1] S. Zhou, J. Wang, L. Wang, C. Song, K. Chen, J. Zhu, *Angew. Chem. Int. Ed.* **2016**, *55*, 9384-9388.
- [2] A. Ballesteros, P. Morán-Poladuraa, J. M. González, *Chem. Commun.* **2016**, *52*, 2905-2908.
- [3] Y. Wang, P. Zhang, X. Di, Q. Dai, Z.-M. Zhang, J. Zhang, *Angew. Chem. Int. Ed.* **2017**, *56*, 15905-15909.
- [4] G. S. Lal, G. P. Pez, R. J. Pesaresi, F. M. Prozonic, H. Cheng, *J. Org. Chem.* **1999**, *64*, 7048-7054.
- [5] D. Behera, S. Thiyagarajan, P. K. Anjalikrishna, C. H. Suresh, C. Gunanathan, *ACS Catal.* **2021**, *11*, 5885-5893.
- [6] M. M. Hinman, T. A. Rosenberg, D. Balli, C. Black-Schaefer, L. E. Chovan, D. Kalvin, P. J. Merta, A. M. Nilius, S. D. Pratt, N. B. Soni, F. L. Wagenaar, M. Weitzberg, R. Wagner, B. A. Beutel. *J. Med. Chem.* **2006**, *49*, 4842-4856.
- [7] R. J. Griffiths, W. C. Kong, S. A. Richards, G. A. Burley, M. C. Willis, E. P. A. Talbot, *Chem. Sci.* **2018**, *9*, 2295-2300.

## 8. $^1\text{H}$ and $^{13}\text{C}$ NMR spectra

7.781  
7.766  
7.457  
7.444  
7.430  
7.401  
7.386  
7.370  
7.339  
7.323  
7.013  
6.572

3.232  
3.091  
2.429

$^1\text{H}$  NMR (500 MHz,  $\text{CDCl}_3$ )

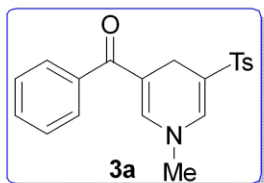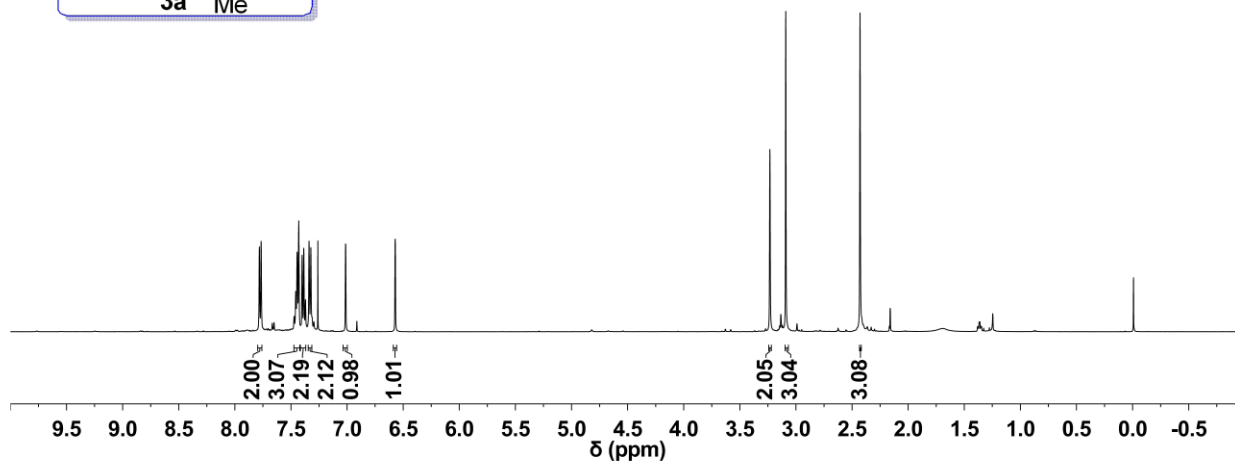

194.246

144.781  
144.379  
139.213  
136.868  
135.906  
130.958  
130.056  
128.548  
128.458  
128.270  
115.792  
113.421

41.726

21.831  
20.880

$^{13}\text{C}$  NMR (125 MHz,  $\text{CDCl}_3$ )

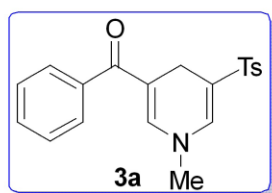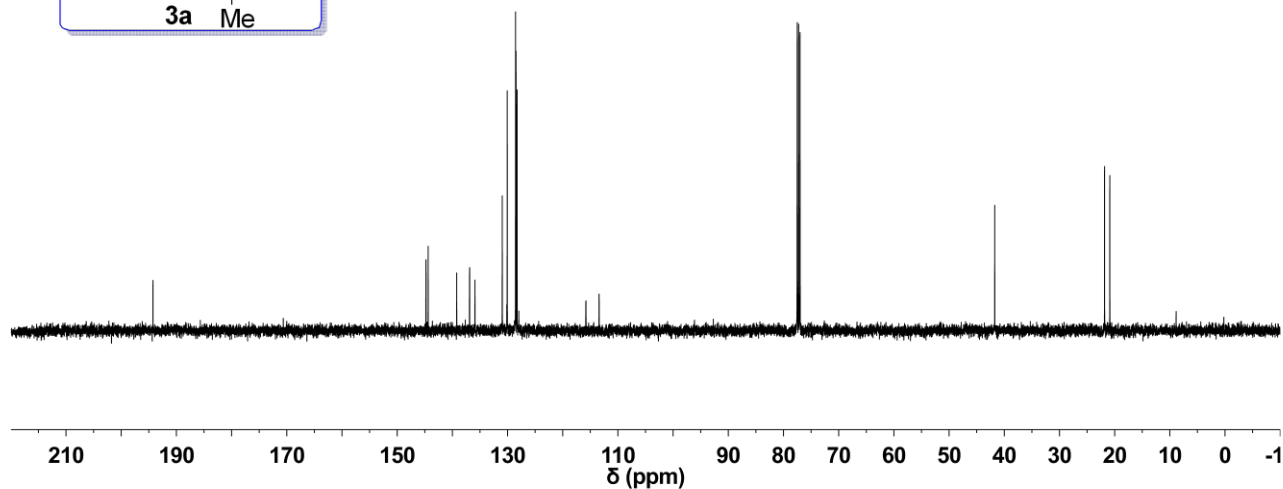

7.795  
7.774  
7.358  
7.337  
7.306  
7.288  
7.273  
7.268  
7.267  
7.209  
7.189  
7.167  
7.148  
7.090  
7.072  
6.998  
6.349

3.241  
3.050  
2.448  
2.212

$^1\text{H}$  NMR (400 MHz,  $\text{CDCl}_3$ )

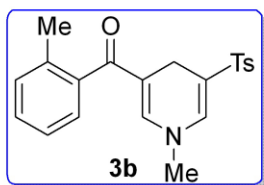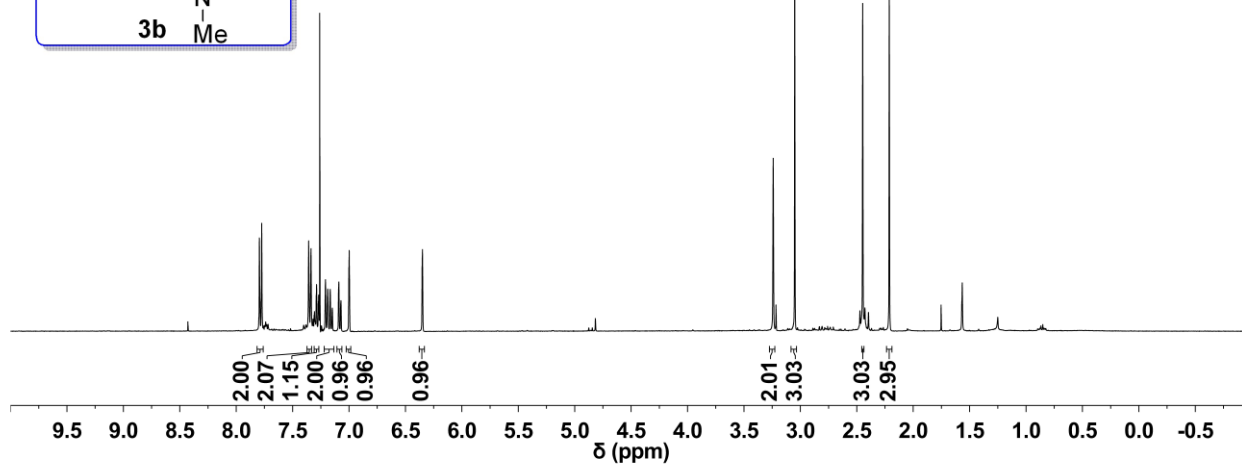

195.943

145.098  
144.453  
139.091  
136.749  
135.871  
135.785  
130.986  
130.101  
129.481  
128.333  
127.373  
125.405  
116.250  
114.655

41.714

21.884  
20.422  
19.572

$^{13}\text{C}$  NMR (101 MHz,  $\text{CDCl}_3$ )

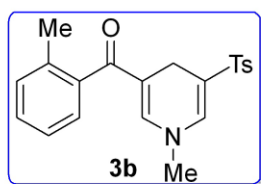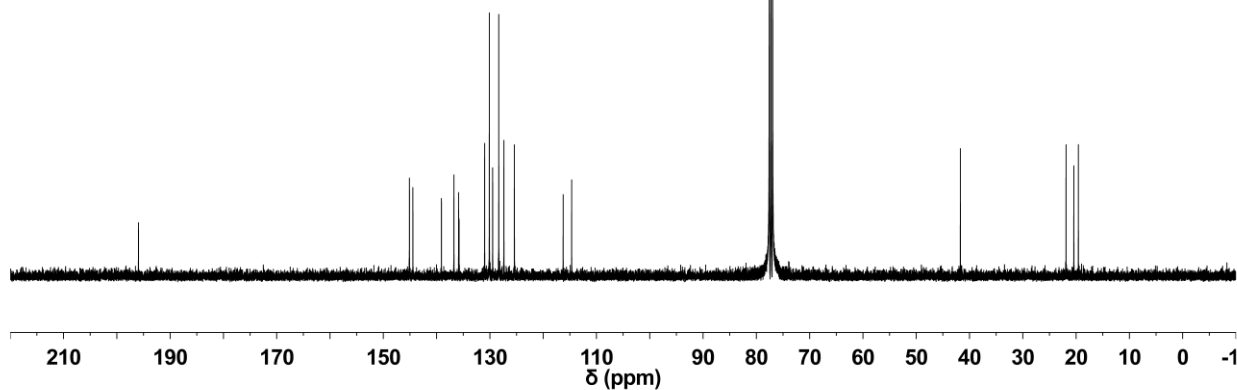

7.778  
7.758  
7.391  
7.348  
7.328  
7.260  
7.246  
7.189  
7.187  
7.170  
7.168  
7.103  
7.101  
7.080  
6.993  
6.453

3.228  
3.092  
2.436

$^1\text{H}$  NMR (400 MHz,  $\text{CDCl}_3$ )

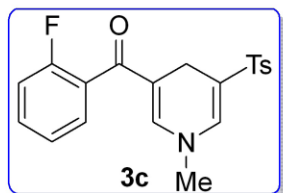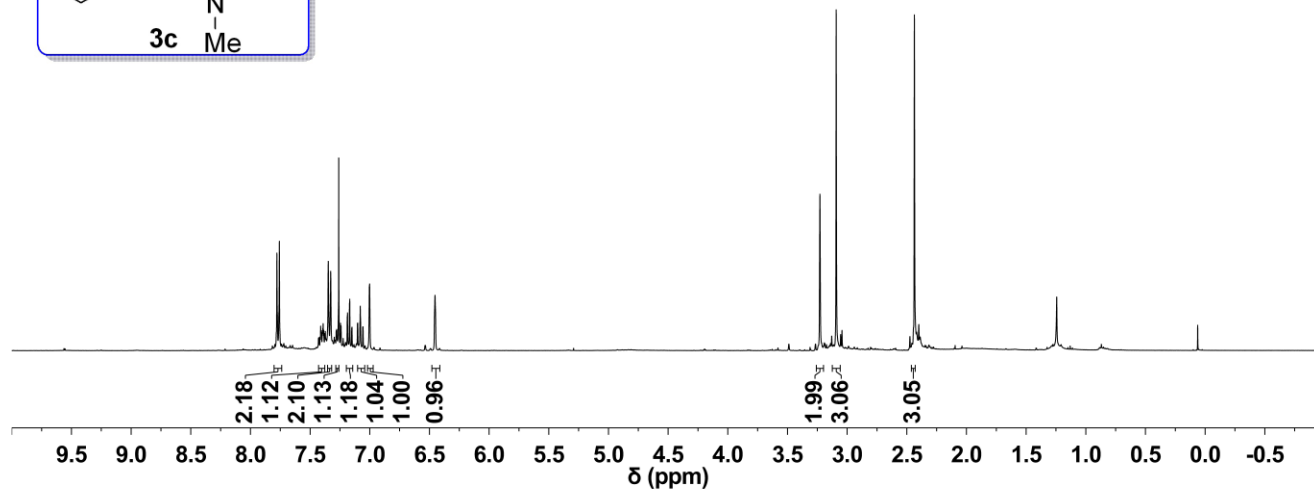

189.958

160.331  
157.859  
145.447  
144.501  
136.682  
135.618  
131.907  
131.828  
130.081  
129.932  
128.273  
124.483  
116.514  
116.420  
116.203  
114.232

41.811

21.845  
20.506

$^{13}\text{C}$  NMR (101 MHz,  $\text{CDCl}_3$ )

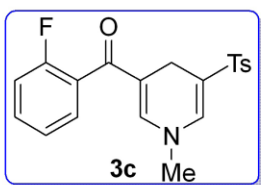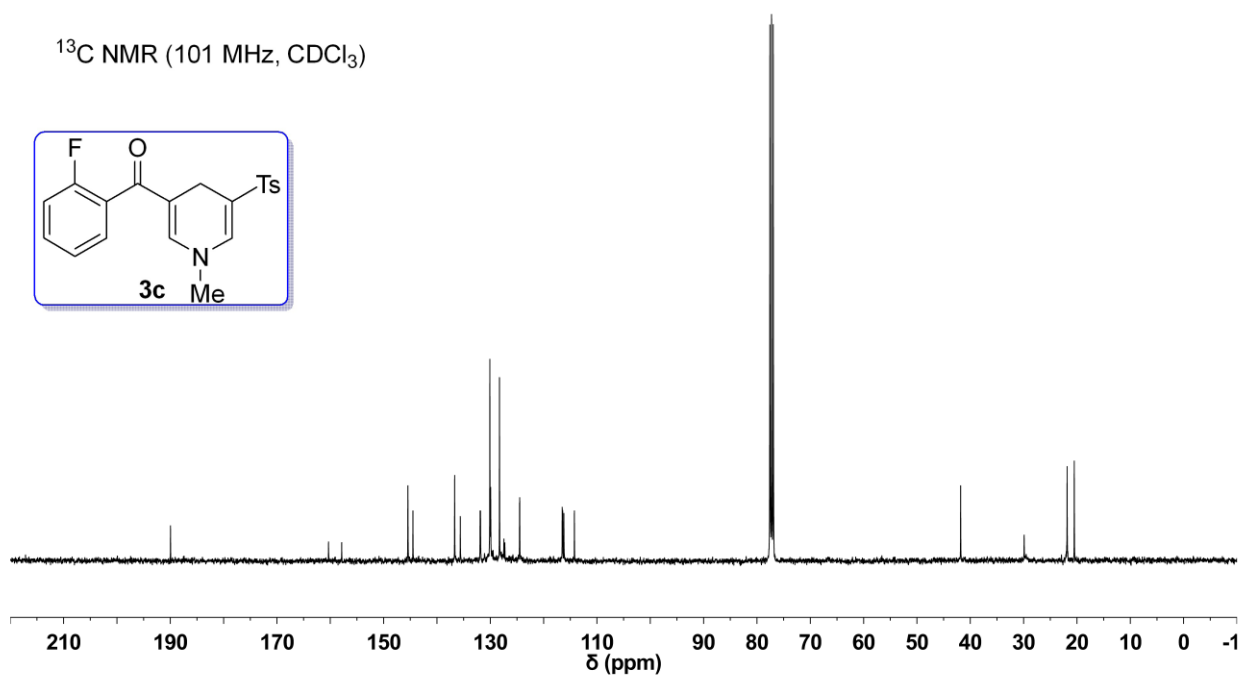

7.786  
7.765  
7.343  
7.322  
7.272  
7.267  
7.260  
7.223  
7.219  
7.211  
7.020  
6.582

3.227  
3.094  
2.431  
2.361

$^1\text{H}$  NMR (400 MHz,  $\text{CDCl}_3$ )

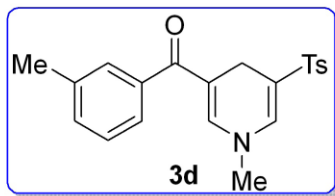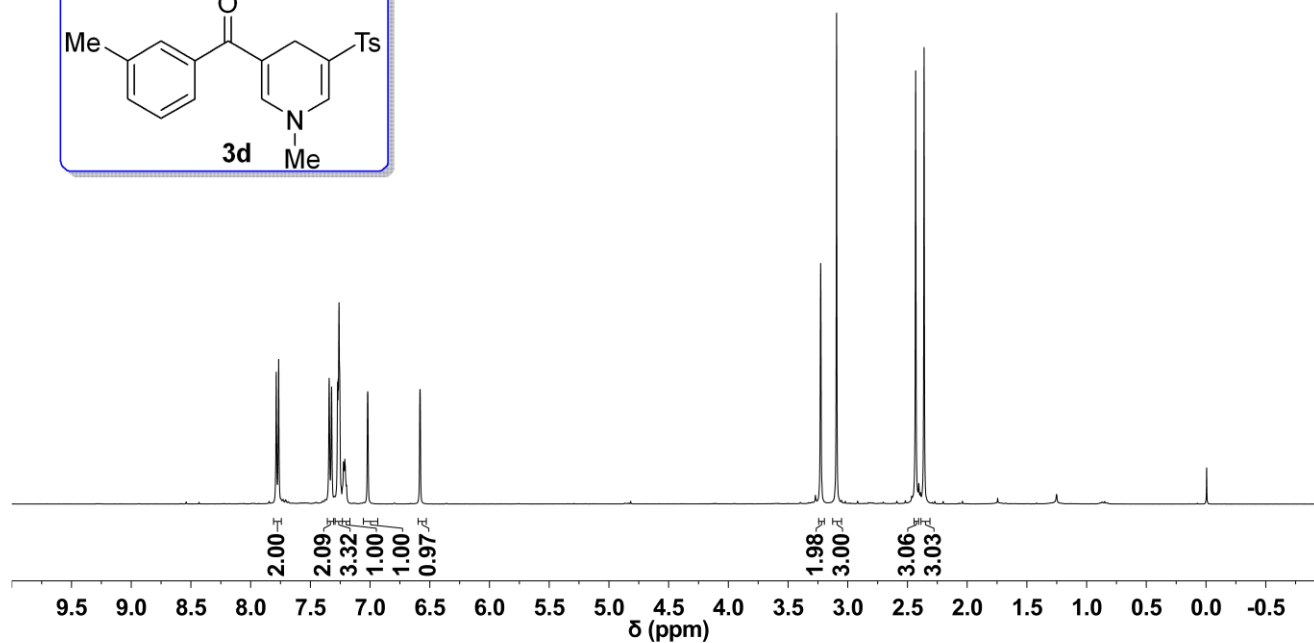

194.491

144.743  
144.330  
139.185  
138.478  
136.909  
135.836  
131.658  
130.013  
128.929  
128.245  
128.214  
125.502  
115.596  
113.383

41.695

21.810  
21.567  
20.814

$^{13}\text{C}$  NMR (101 MHz,  $\text{CDCl}_3$ )

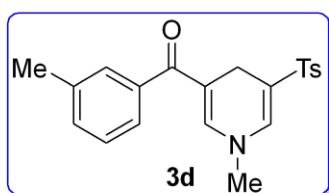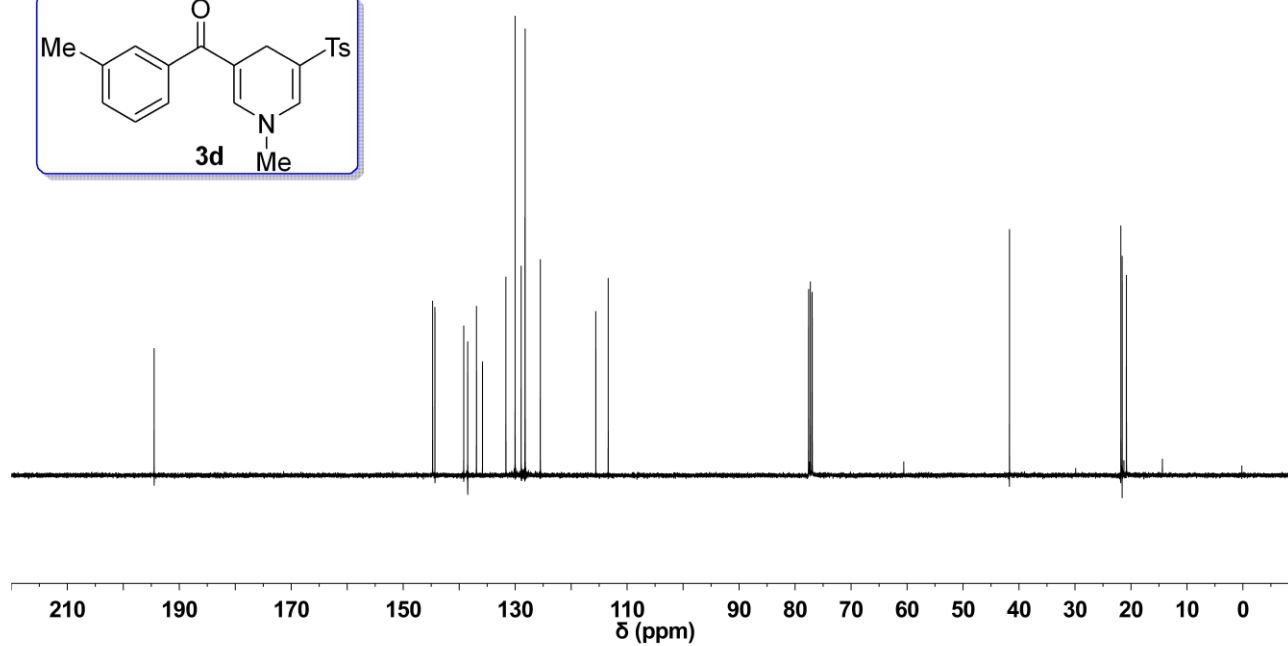

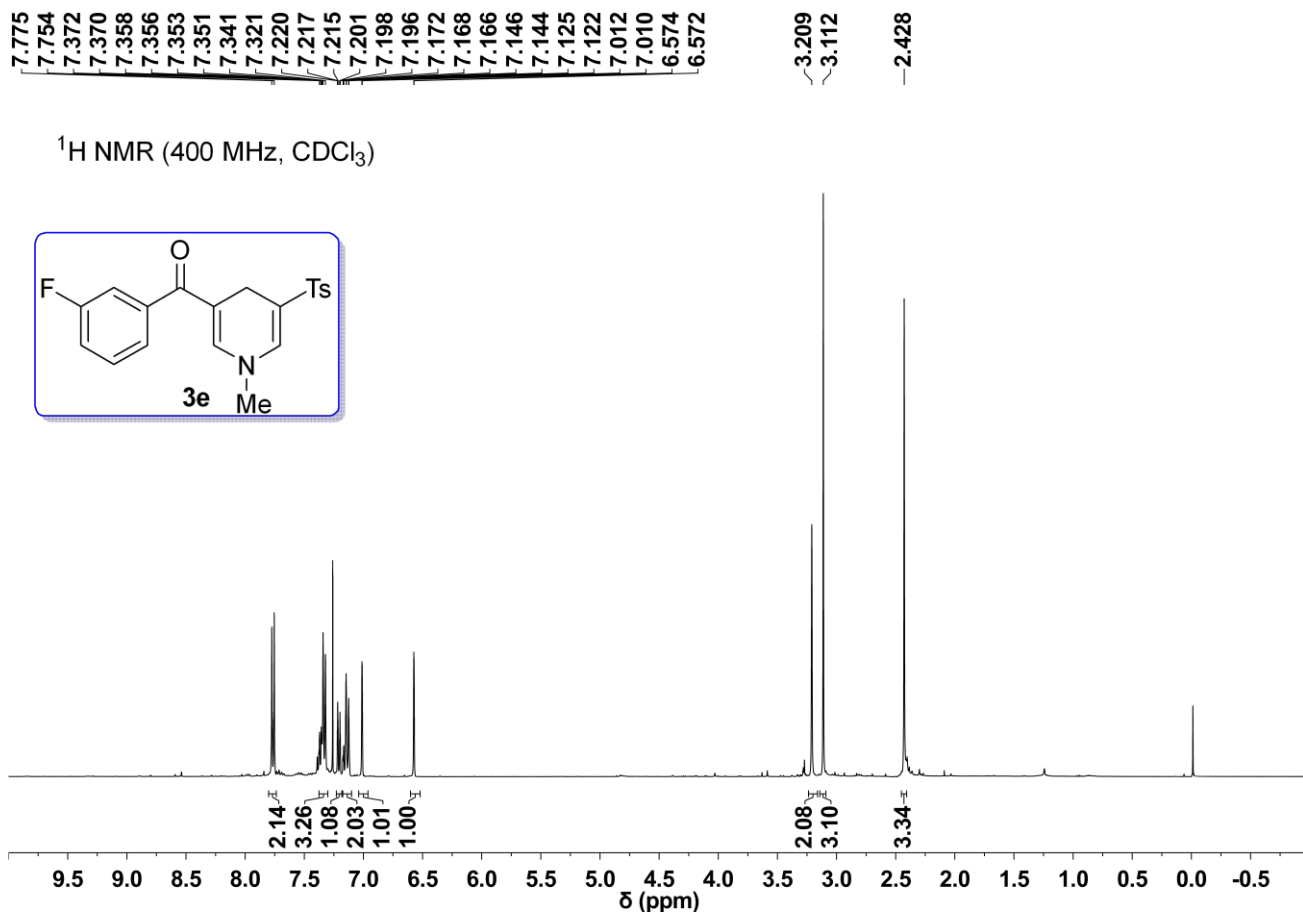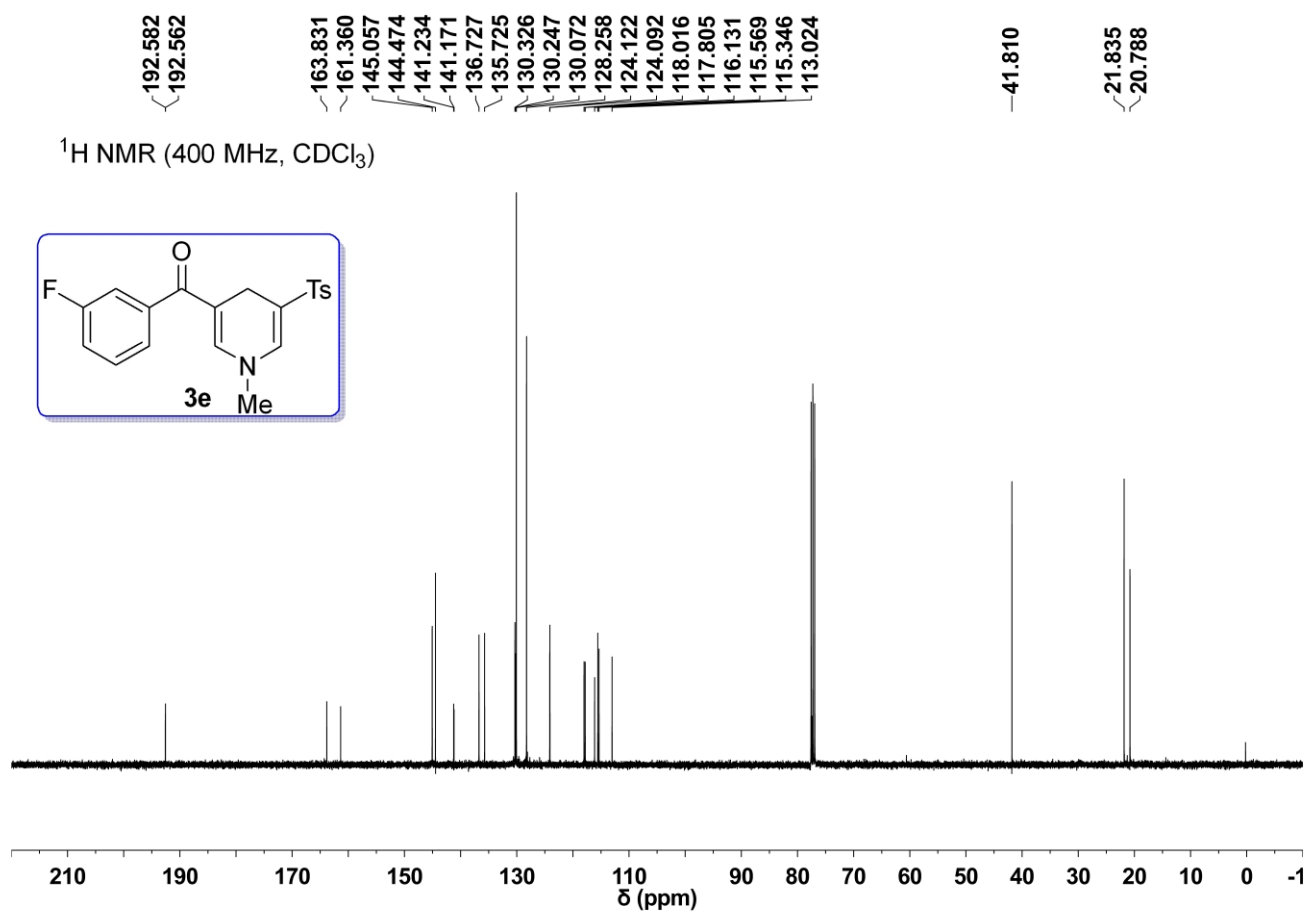

7.775  
7.754  
7.362  
7.342  
7.331  
7.311  
7.194  
7.175  
7.010  
6.583

3.219  
3.084

2.420  
2.369

$^1\text{H}$  NMR (400 MHz,  $\text{CDCl}_3$ )

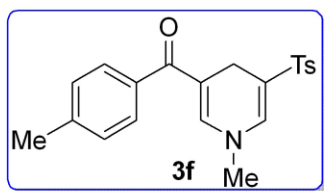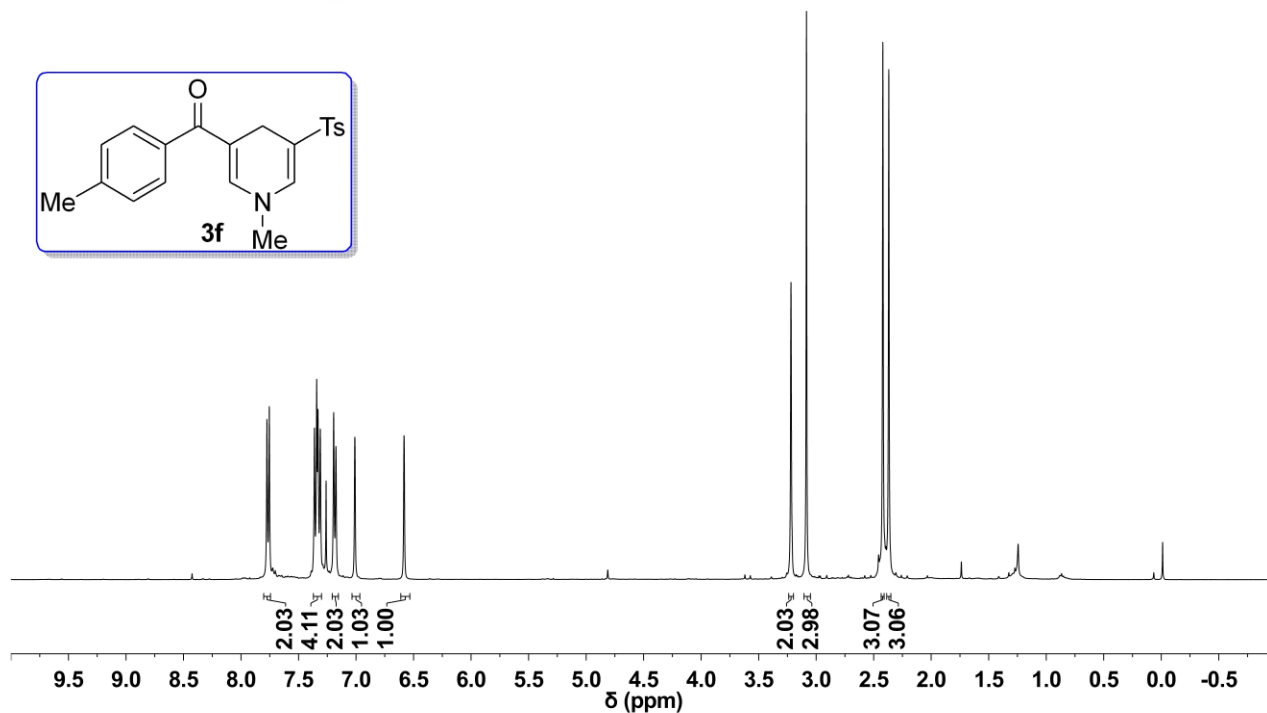

194.916

144.258  
141.020  
137.093  
135.816  
129.955  
128.102  
115.029  
114.017

41.634

24.751  
21.785  
20.371

$^{13}\text{C}$  NMR (101 MHz,  $\text{CDCl}_3$ )

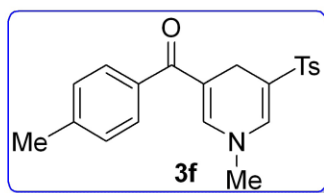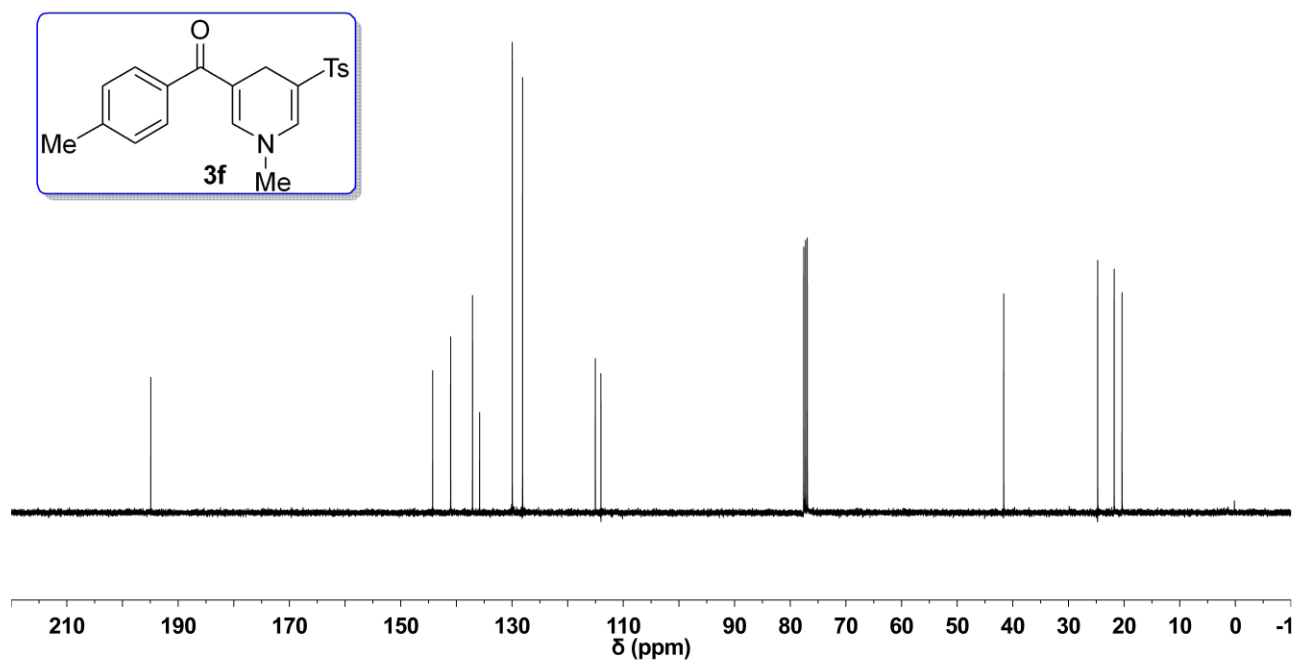



7.774  
7.754  
7.470  
7.453  
7.448  
7.331  
7.311  
7.011  
6.897  
6.875  
6.581

3.827  
3.221  
3.097  
2.421

$^1\text{H}$  NMR (400 MHz,  $\text{CDCl}_3$ )

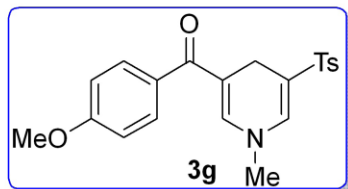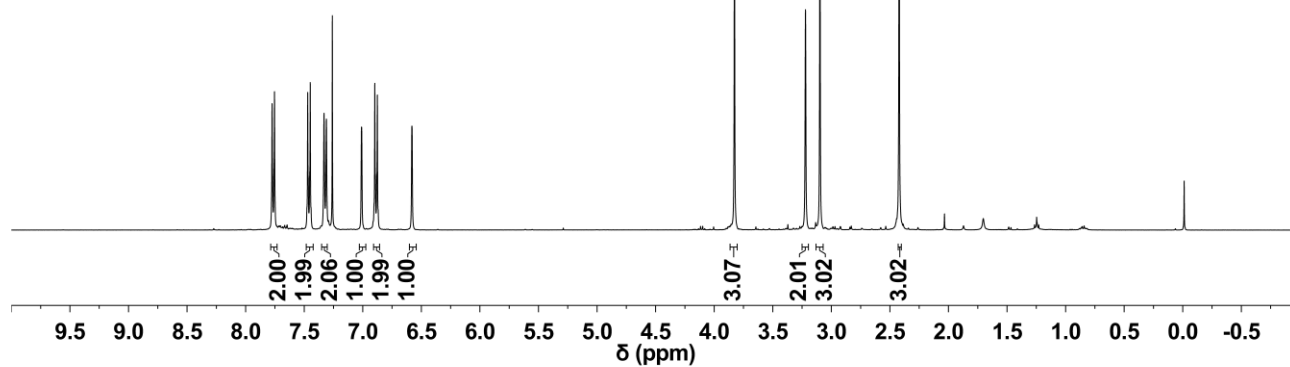

193.287  
162.120  
144.325  
143.808  
137.012  
135.931  
131.565  
130.668  
130.047  
128.260  
115.264  
113.829  
113.441

55.644  
41.689  
21.851  
21.085

$^{13}\text{C}$  NMR (101 MHz,  $\text{CDCl}_3$ )

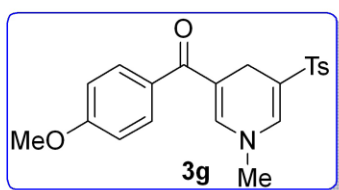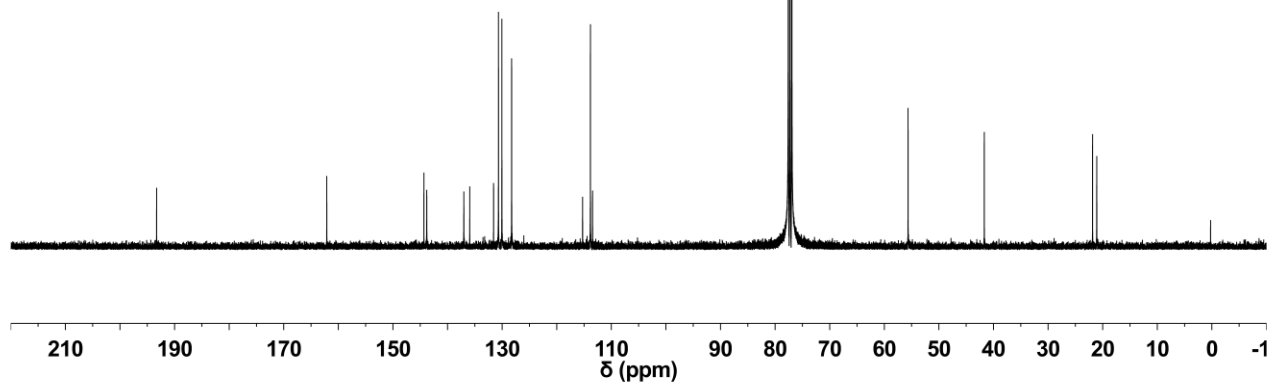

7.757  
7.737  
7.465  
7.451  
7.445  
7.431  
7.323  
7.303  
7.073  
7.051  
7.030  
7.005  
6.549

3.196  
3.095  
2.409

$^1\text{H}$  NMR (400 MHz,  $\text{CDCl}_3$ )

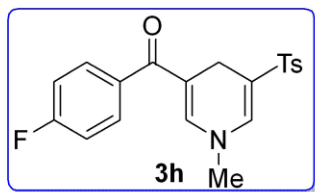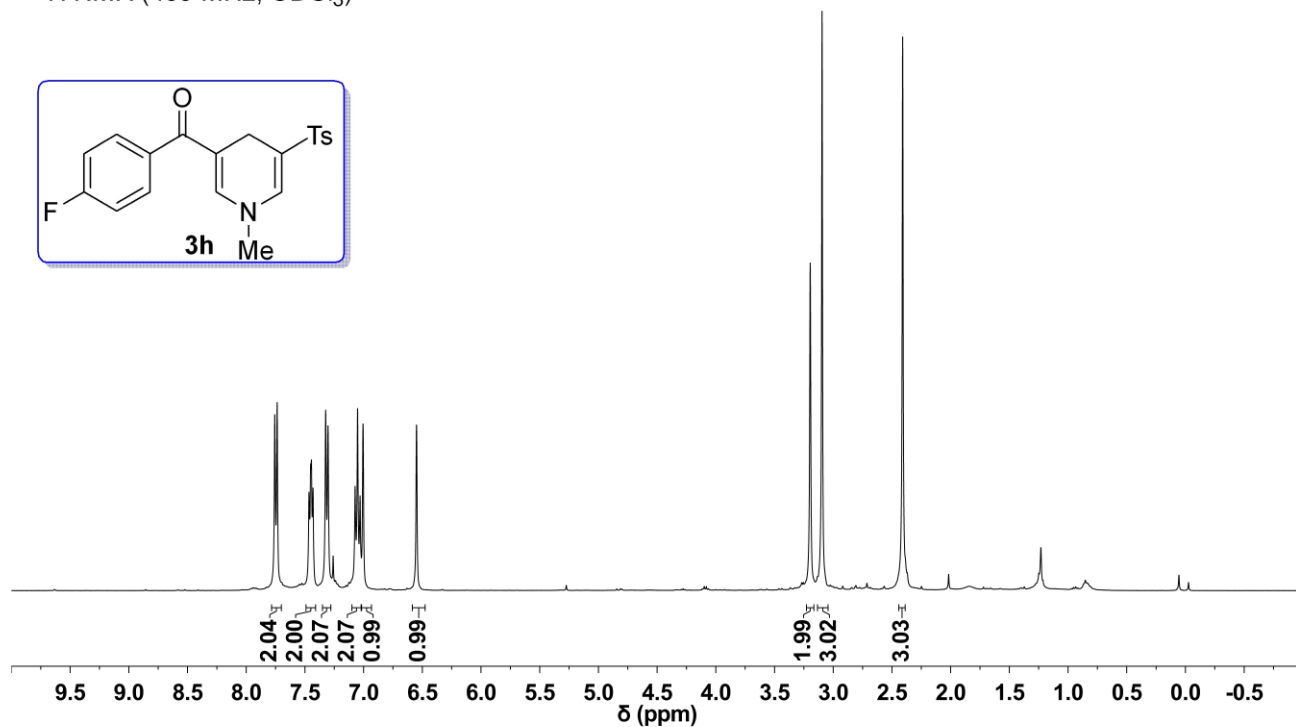

192.795

165.622

163.122

144.631

144.387

136.867

135.770

130.766

130.679

130.015

128.162

115.660

115.486

113.110

41.722

21.776

20.863

$^{13}\text{C}$  NMR (101 MHz,  $\text{CDCl}_3$ )

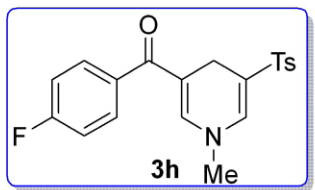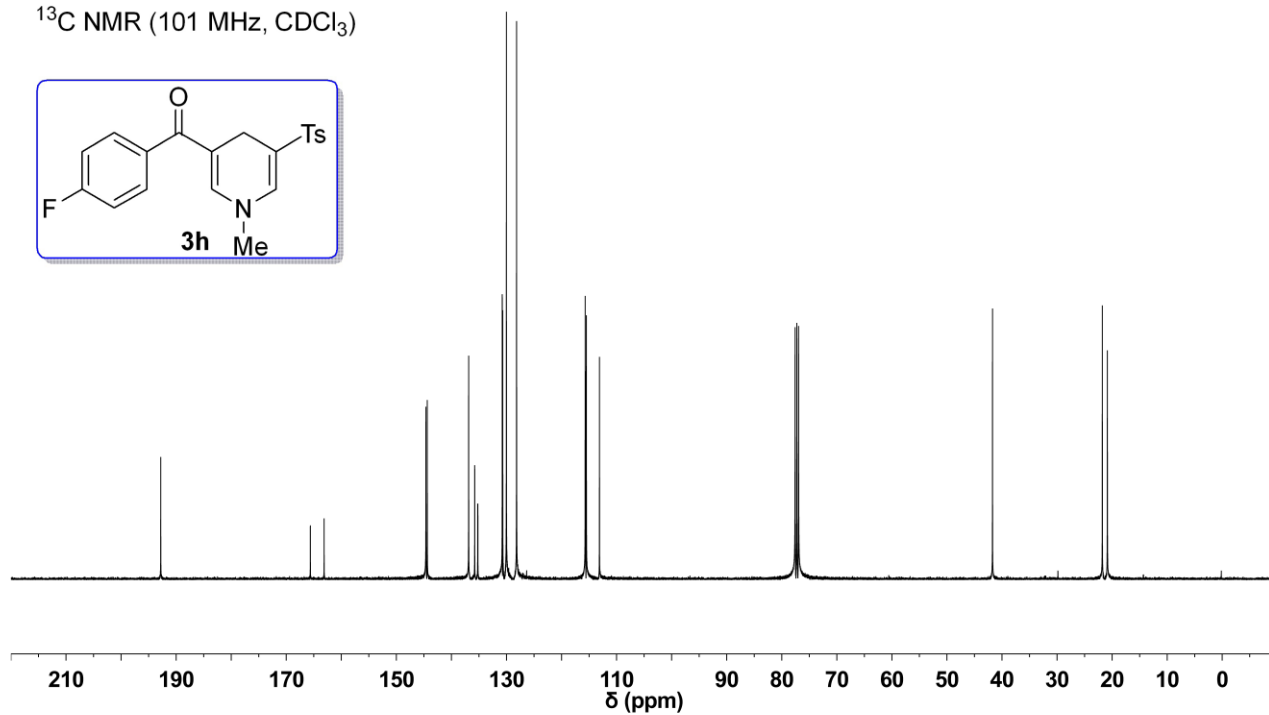

7.773  
7.753  
7.401  
7.379  
7.370  
7.348  
7.340  
7.319  
7.012  
6.543

3.208  
3.106

2.427

$^1\text{H}$  NMR (400 MHz,  $\text{CDCl}_3$ )

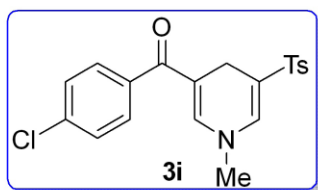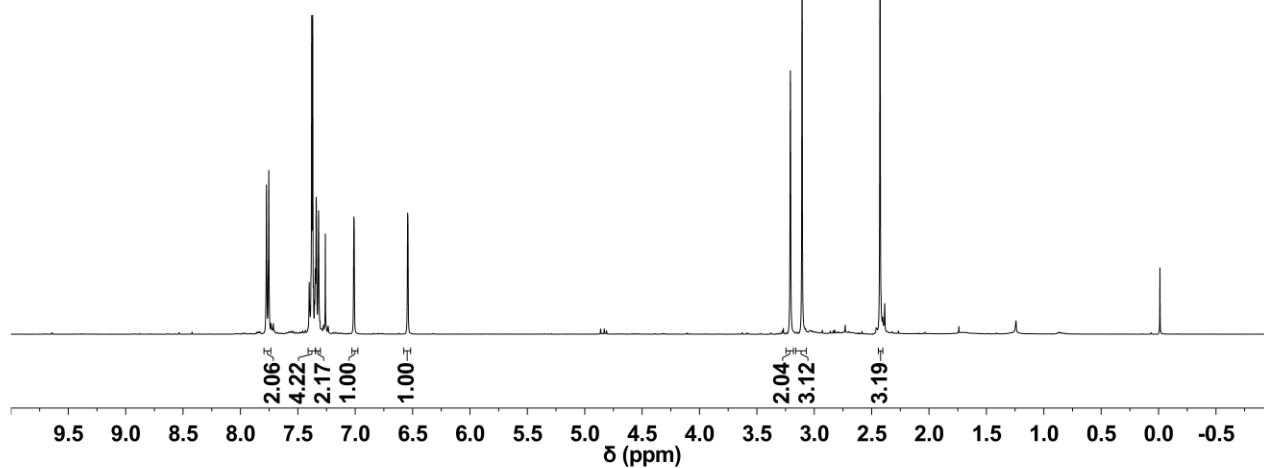

192.886

144.789  
144.451  
137.449  
137.153  
136.766  
135.757  
130.063  
129.876  
128.830  
128.245  
115.994  
113.191

41.780

21.831  
20.844

$^{13}\text{C}$  NMR (101 MHz,  $\text{CDCl}_3$ )

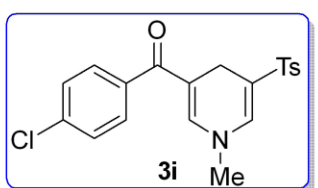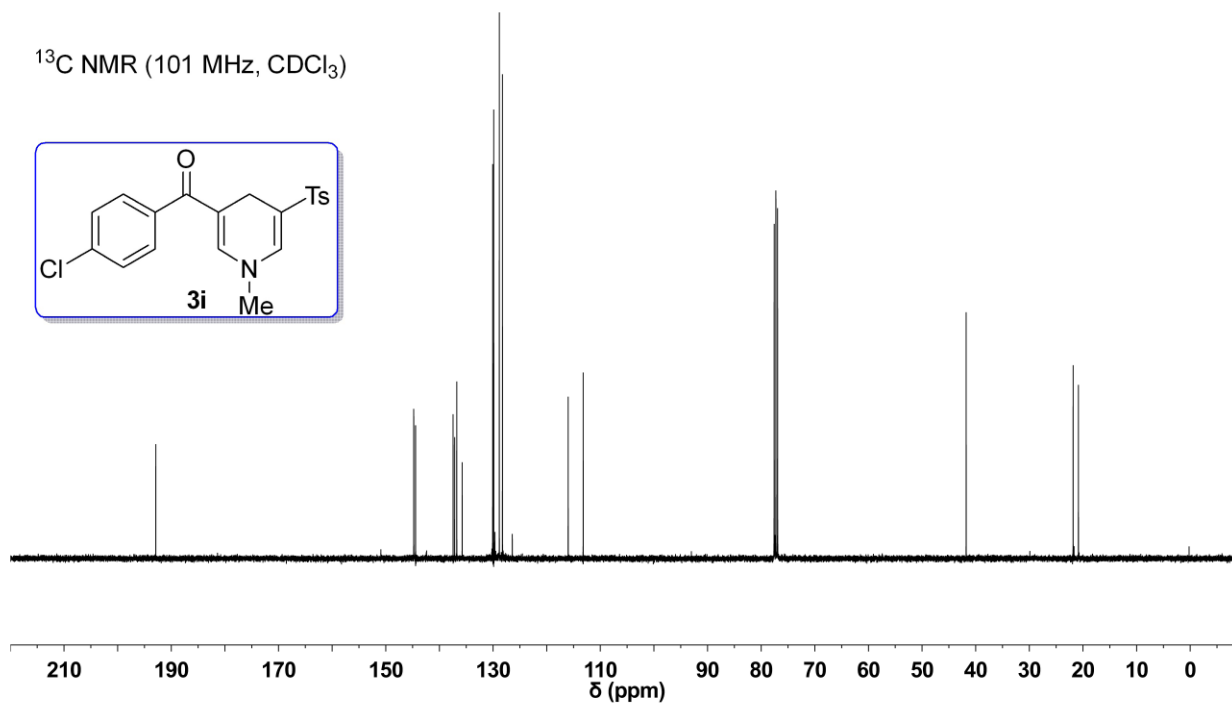

7.775  
7.755  
7.539  
7.518  
7.342  
7.326  
7.305  
7.011  
6.539

3.208  
3.108  
2.430

$^1\text{H}$  NMR (400 MHz,  $\text{CDCl}_3$ )

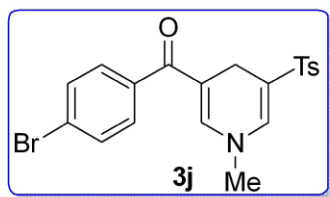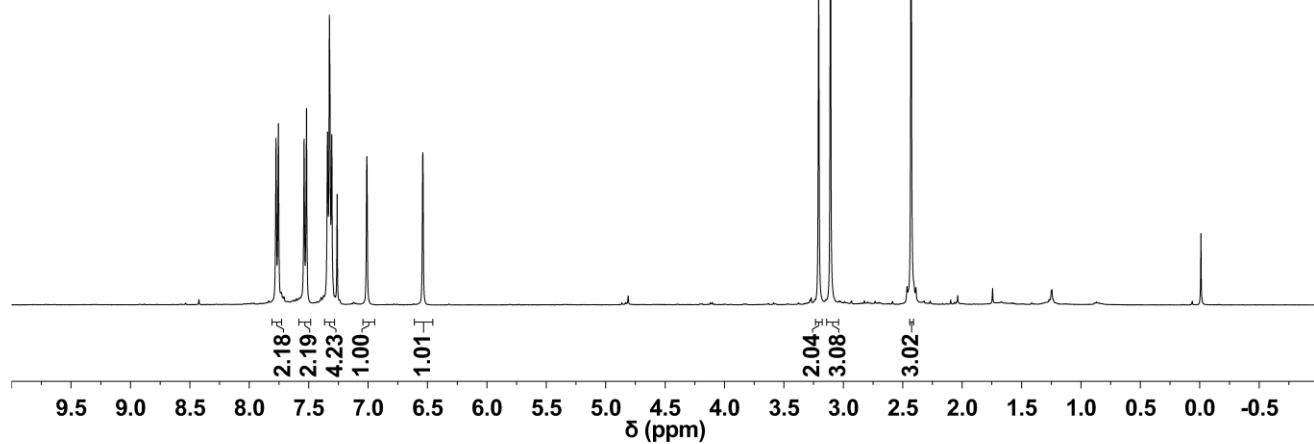

192.966

144.816  
144.462  
137.912  
136.734  
135.753  
131.798  
130.072  
130.055  
128.263  
125.539  
116.073  
113.203

41.791

21.843  
20.837

$^{13}\text{C}$  NMR (101 MHz,  $\text{CDCl}_3$ )

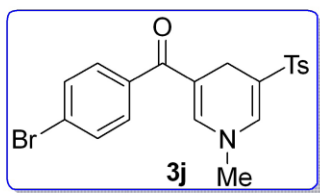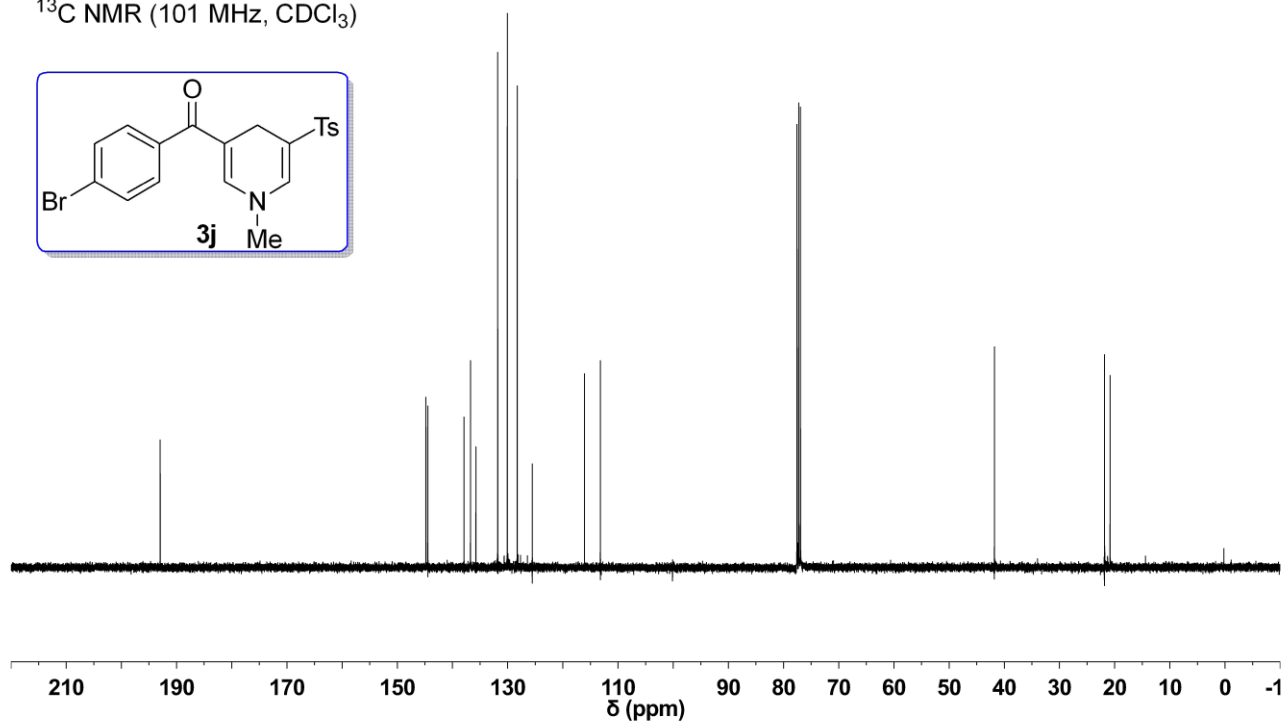

7.784  
7.764  
7.712  
7.691  
7.533  
7.512  
7.357  
7.337  
7.016  
6.487

3.223  
3.124  
2.442

$^1\text{H}$  NMR (400 MHz,  $\text{CDCl}_3$ )

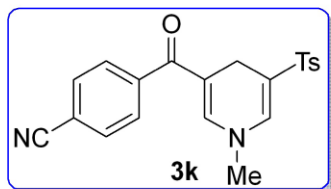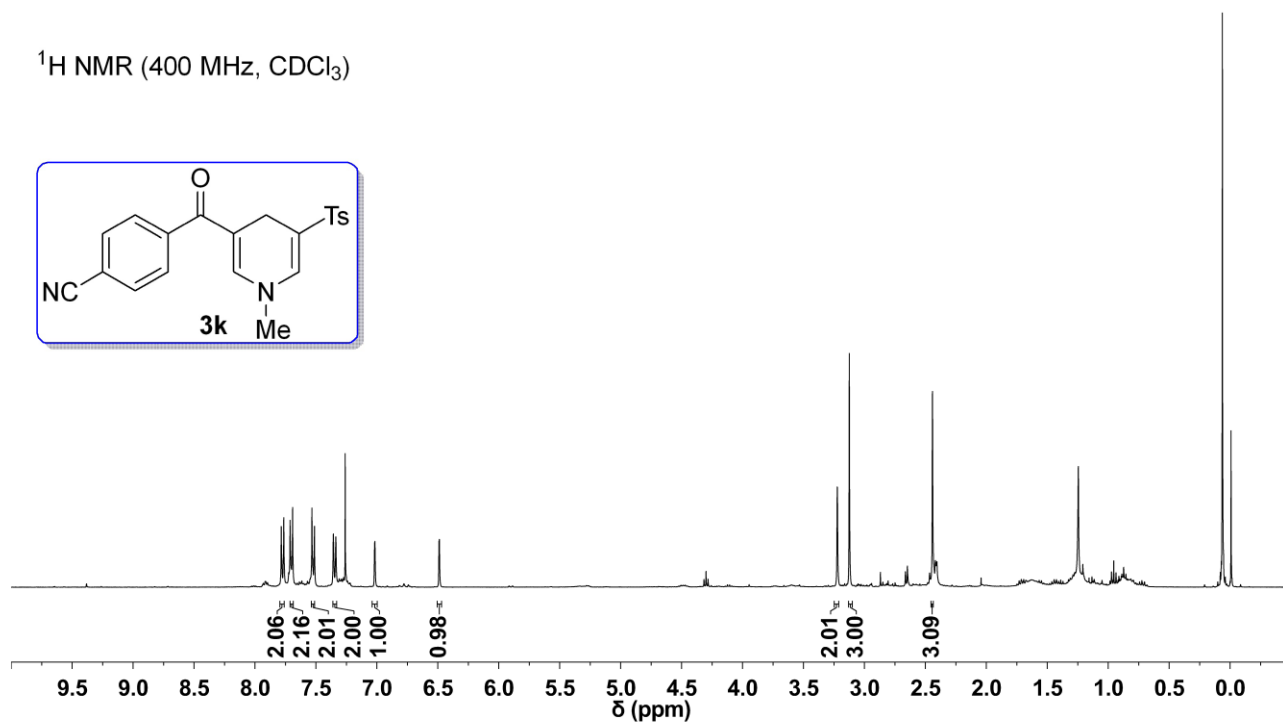

192.209

145.499  
144.653  
143.162  
136.461  
135.492  
132.477  
130.134  
128.927  
128.318  
116.783  
114.427  
113.044

41.923

21.889  
20.708

$^{13}\text{C}$  NMR (101 MHz,  $\text{CDCl}_3$ )

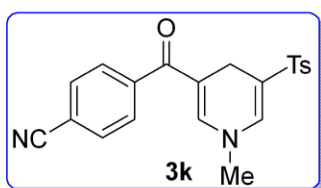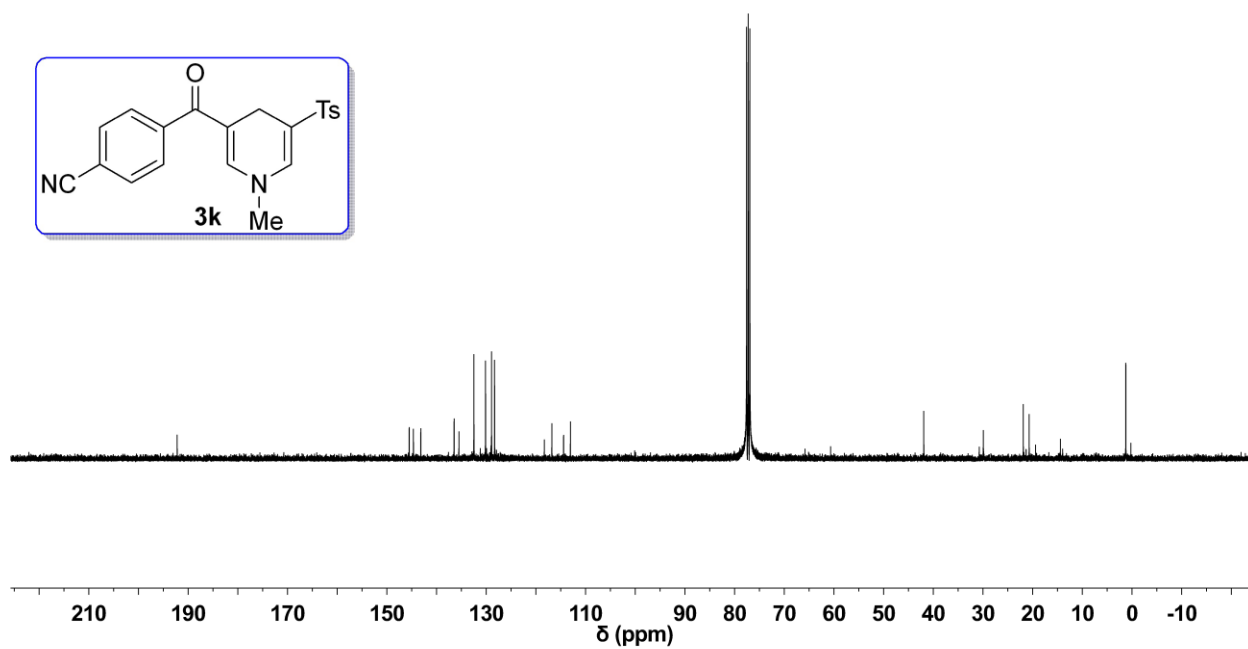

7.927  
7.891  
7.881  
7.874  
7.871  
7.860  
7.809  
7.789  
7.570  
7.567  
7.561  
7.557  
7.550  
7.545  
7.541  
7.538  
7.535  
7.361  
7.341  
7.039  
6.643

3.298  
3.088  
2.447

$^1\text{H}$  NMR (400 MHz,  $\text{CDCl}_3$ )

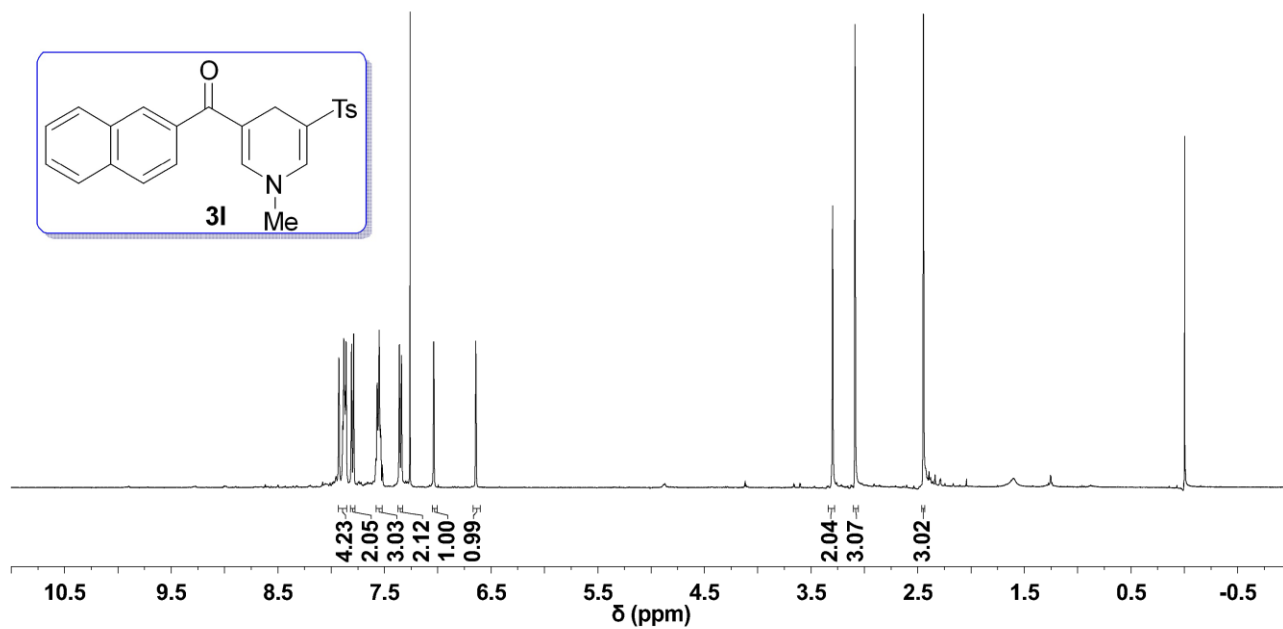

194.277  
144.898  
144.431  
136.498  
135.873  
134.556  
132.549  
130.097  
128.980  
128.658  
128.610  
128.325  
128.044  
127.763  
127.025  
125.487  
113.703

41.762  
21.881  
20.992

$^{13}\text{C}$  NMR (101 MHz,  $\text{CDCl}_3$ )

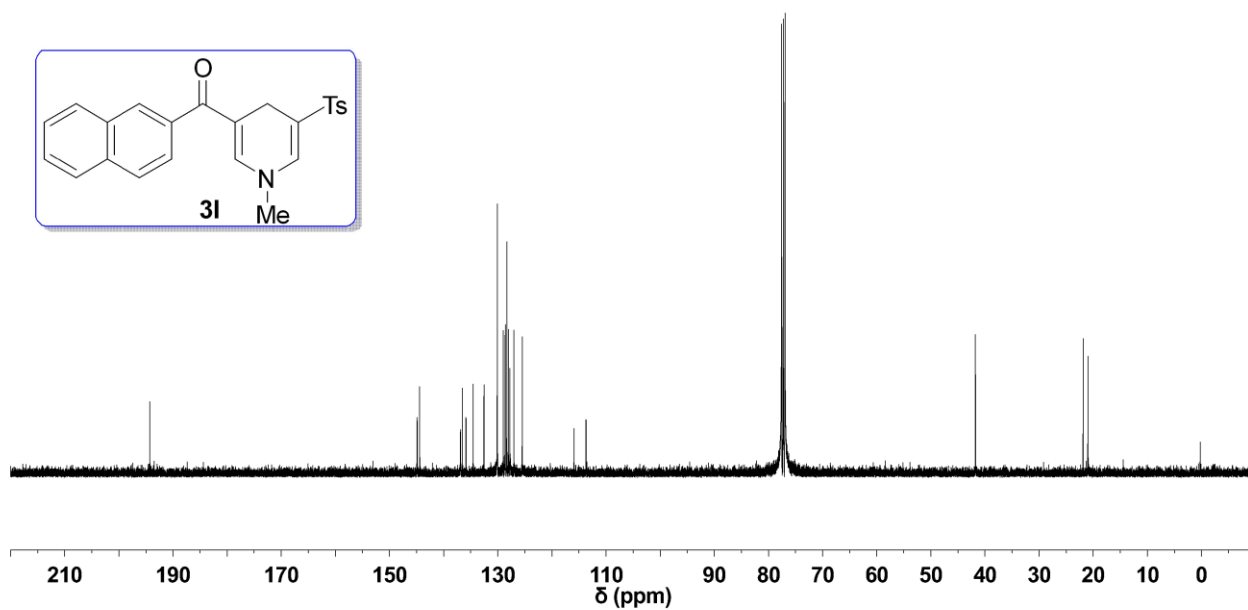

7.776  
7.771  
7.759  
7.755  
7.543  
7.540  
7.530  
7.528  
7.414  
7.411  
7.404  
7.402  
7.337  
7.317  
7.315  
7.075  
7.066  
7.063  
7.054  
7.023  
7.021  
6.956  
6.955  
6.953  
  
3.244  
3.168  
  
2.426

$^1\text{H}$  NMR (400 MHz,  $\text{CDCl}_3$ )

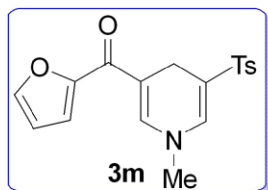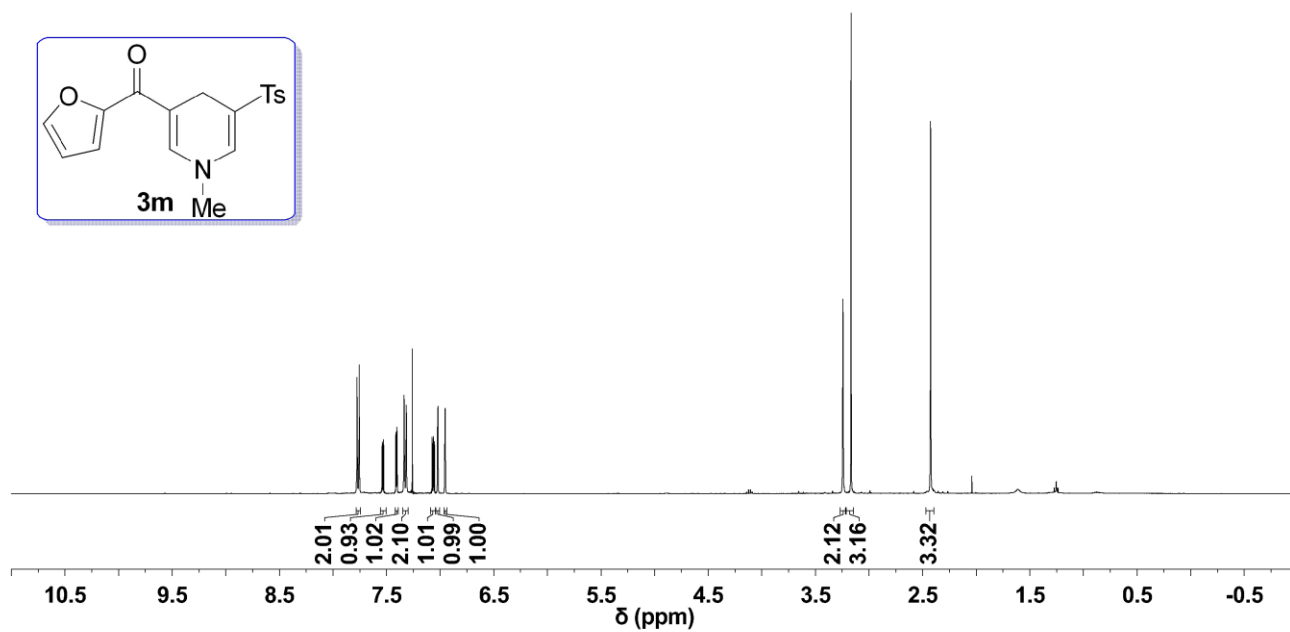

184.792  
144.405  
142.899  
137.008  
135.858  
131.470  
130.925  
130.065  
128.241  
127.507  
115.360  
113.340  
99.736  
  
41.786  
21.849  
21.271

$^{13}\text{C}$  NMR (101 MHz,  $\text{CDCl}_3$ )

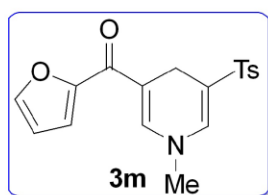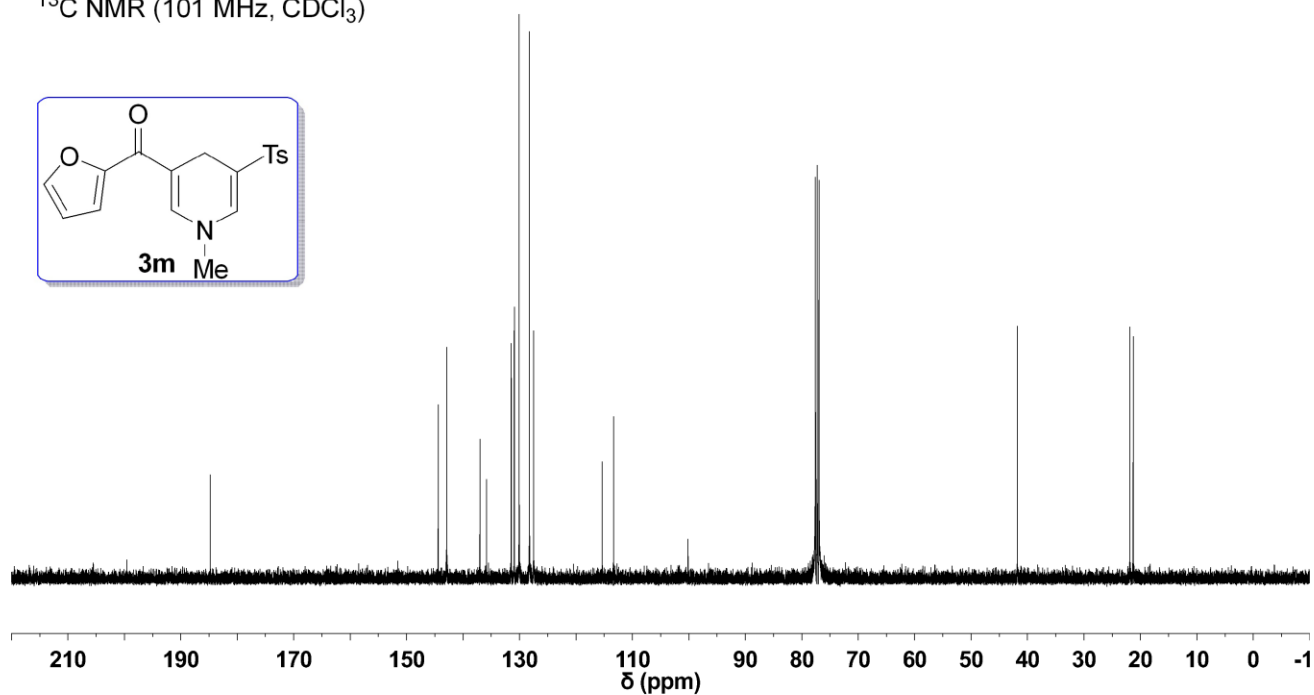

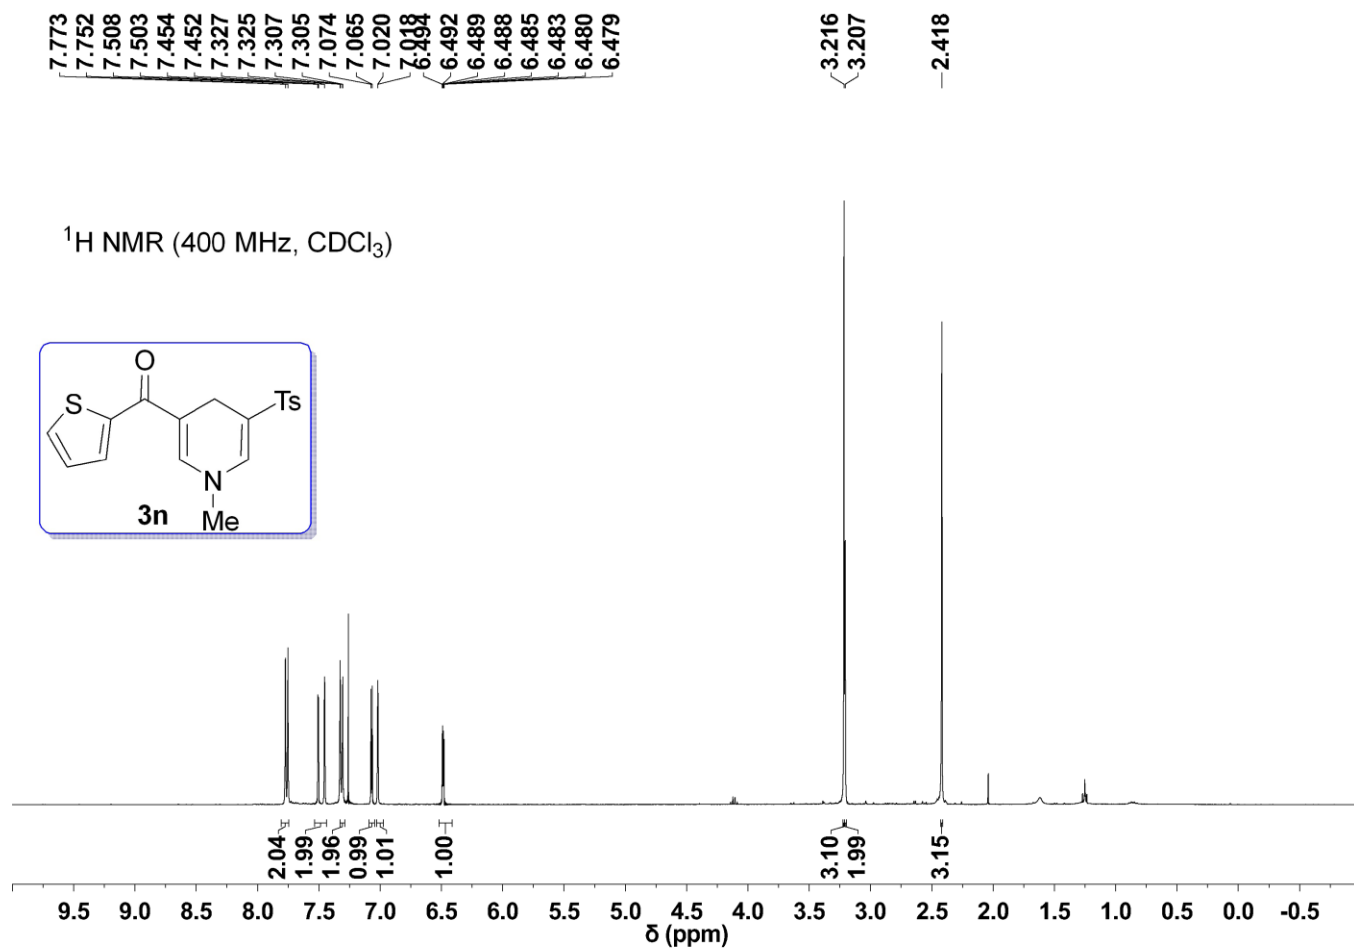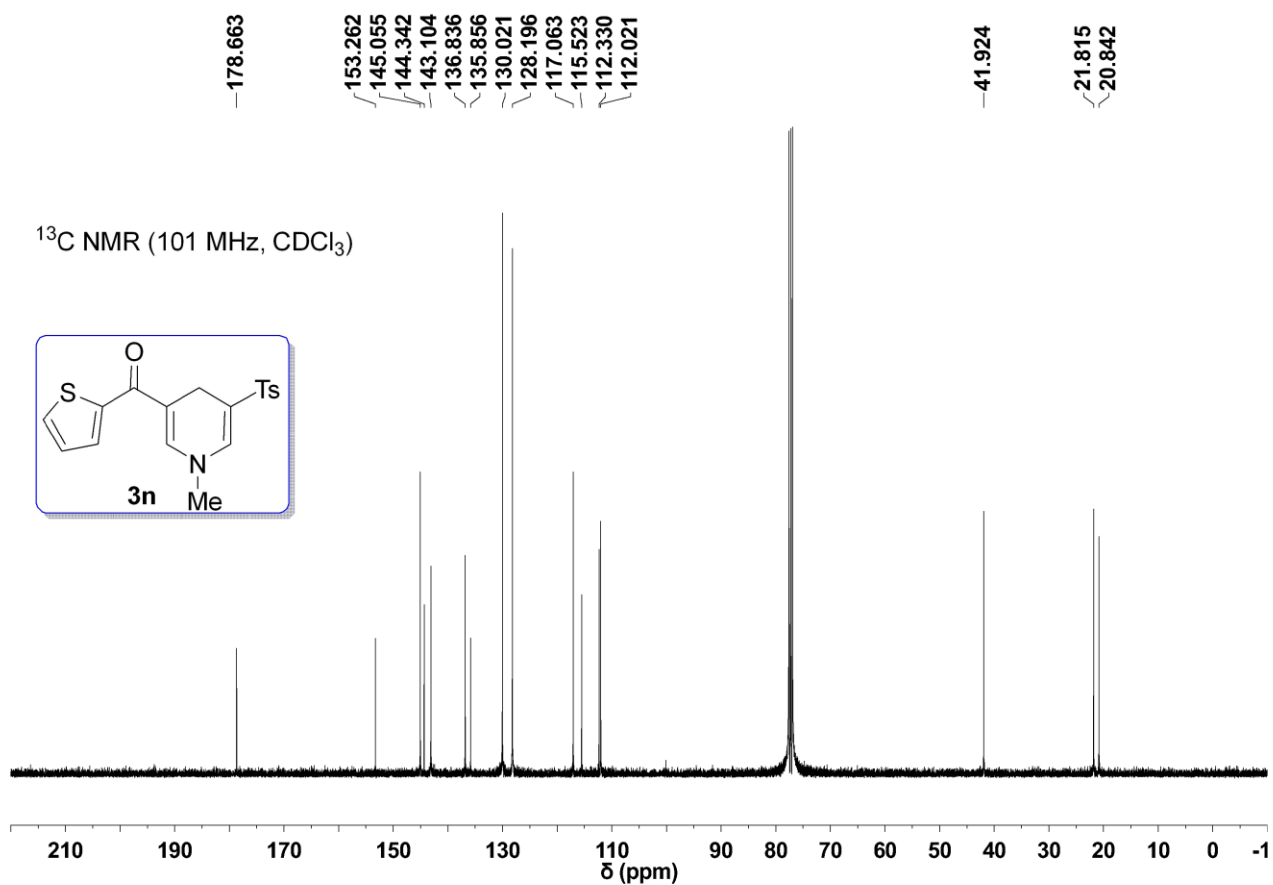



7.776  
7.762  
7.602  
7.571  
7.535  
7.367  
7.330  
7.315  
7.052  
7.022  
6.987

3.211

2.424

$^1\text{H}$  NMR (500 MHz,  $\text{CDCl}_3$ )

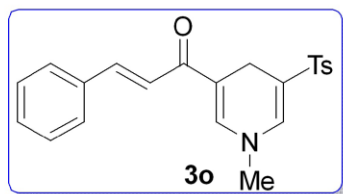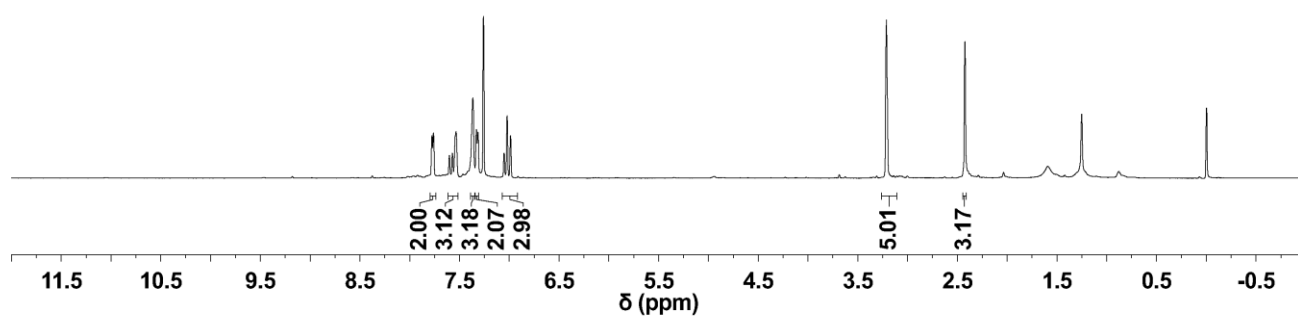

186.578

144.320  
141.854  
140.576  
137.049  
135.849  
135.276  
130.185  
130.008  
129.031  
128.281  
128.154  
120.323  
115.402  
114.931

41.779

21.799  
20.854

$^{13}\text{C}$  NMR (101 MHz,  $\text{CDCl}_3$ )

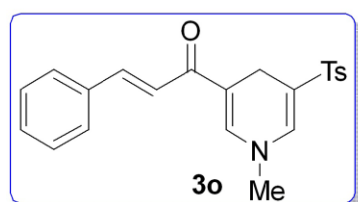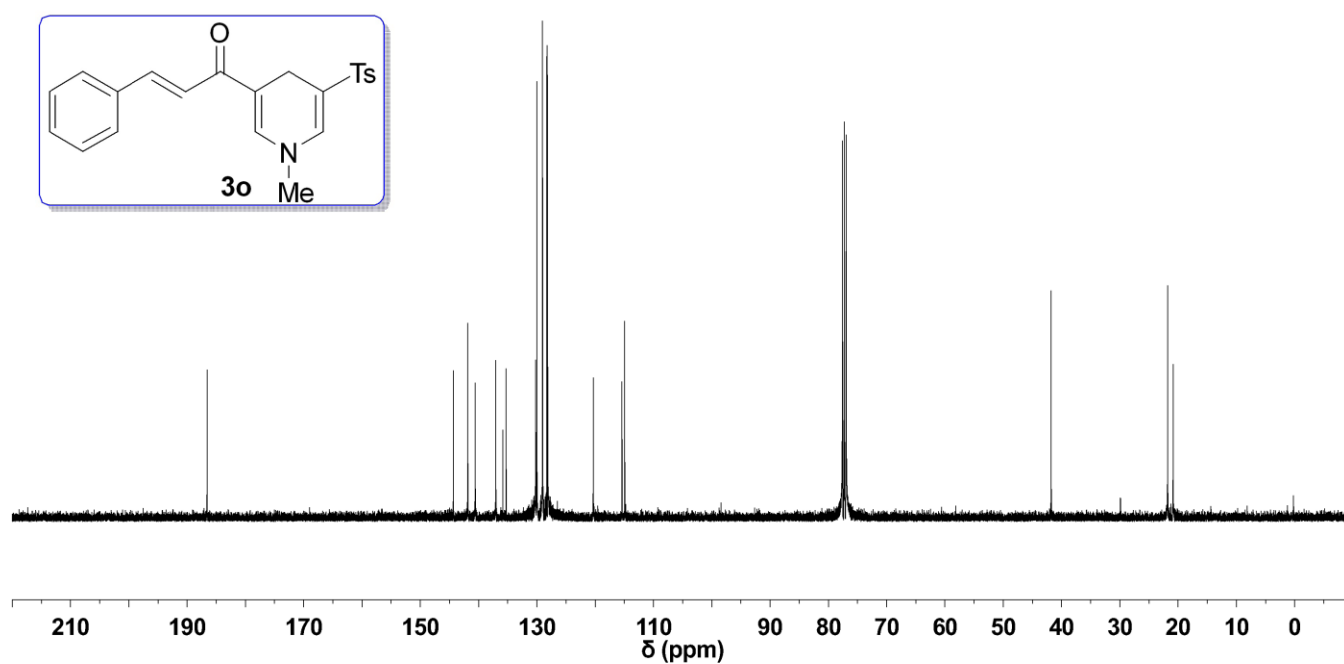

7.727  
7.707  
7.301  
7.281  
6.979  
6.789

3.158  
3.025  
2.400  
2.149

$^1\text{H}$  NMR (400 MHz,  $\text{CDCl}_3$ )

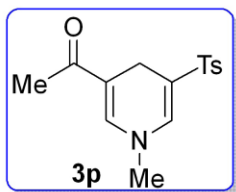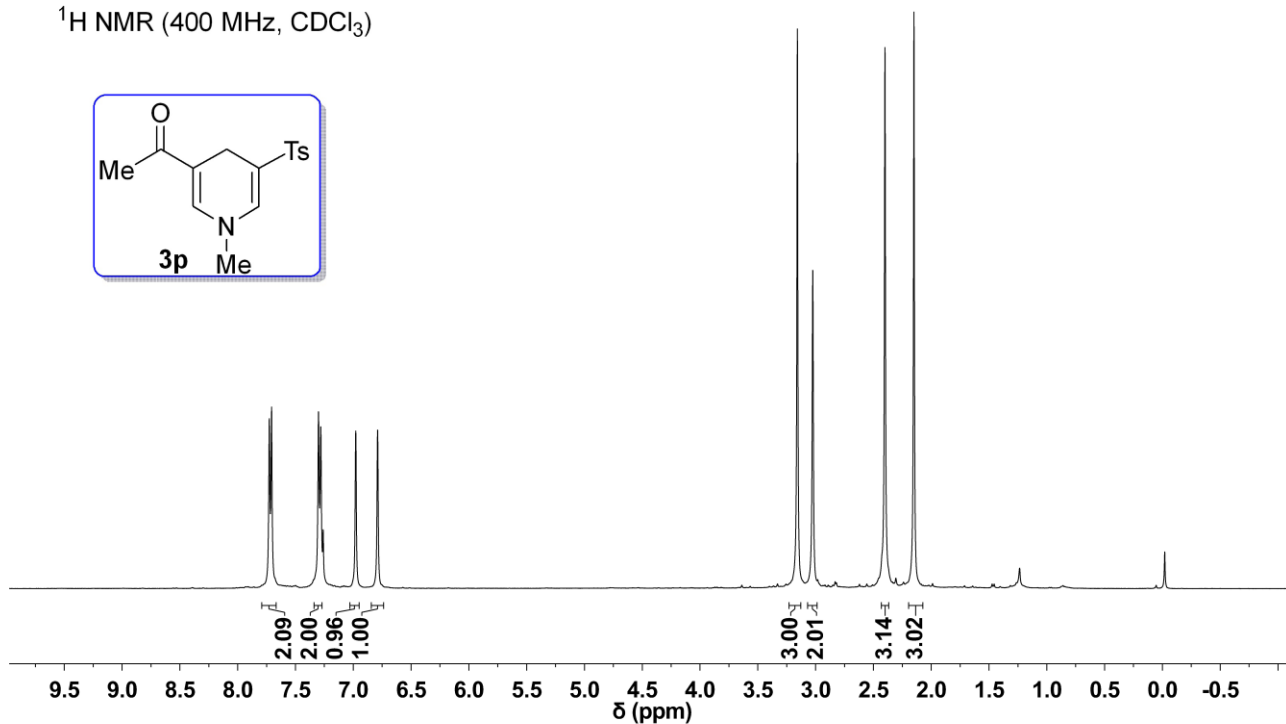

194.910

144.289  
140.932  
137.078  
135.879  
129.997  
128.170  
115.205  
114.134

41.660

24.786  
21.817  
20.441

$^{13}\text{C}$  NMR (101 MHz,  $\text{CDCl}_3$ )

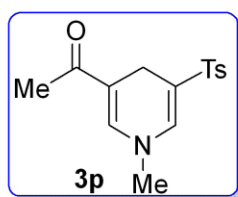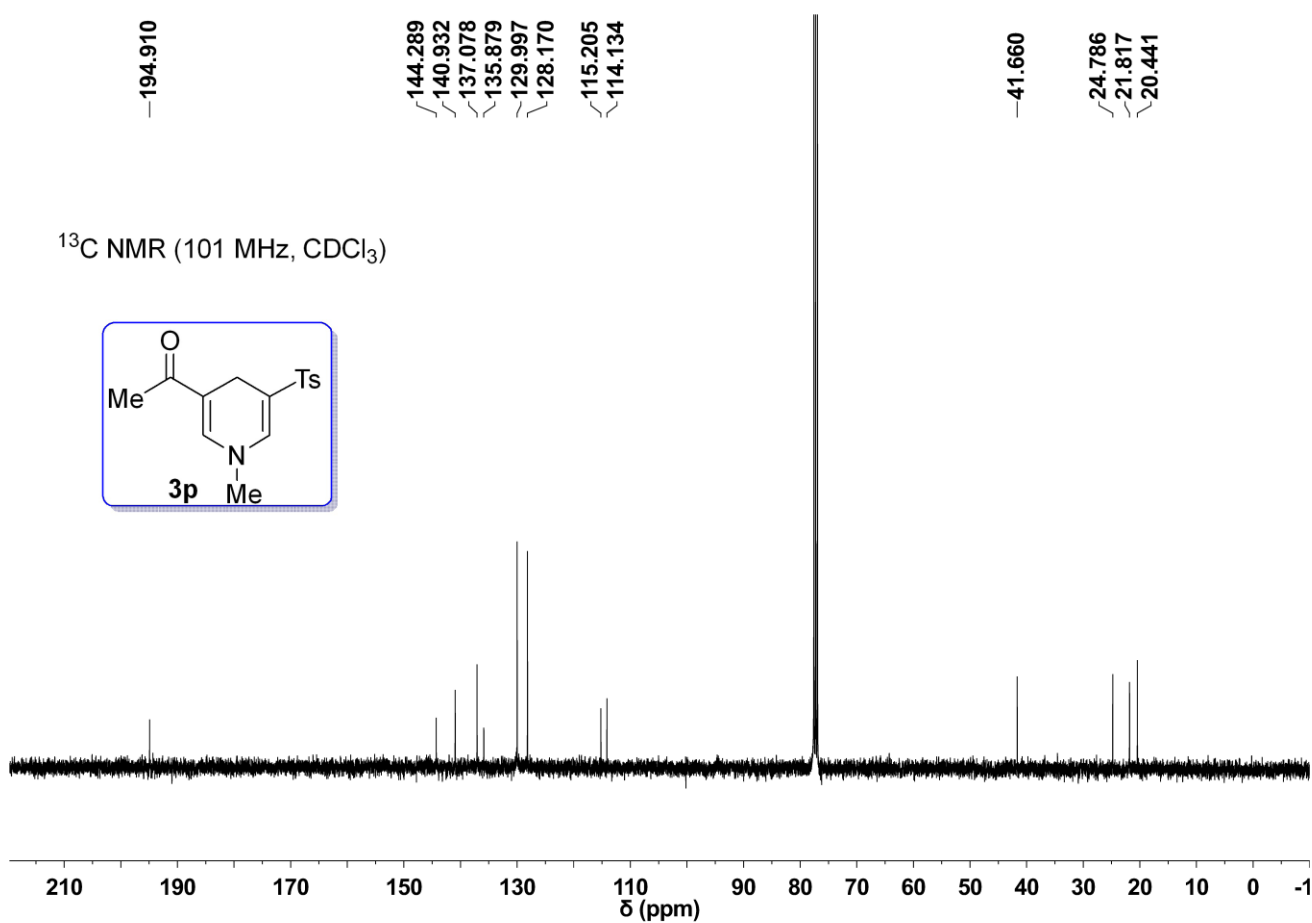

7.747  
7.727  
7.305  
7.284  
7.008

3.178  
3.049  
2.449  
2.434  
2.418  
2.406  
2.331  
2.315  
2.298  
1.981  
1.965  
1.949  
1.933  
1.917

$^1\text{H}$  NMR (400 MHz,  $\text{CDCl}_3$ )

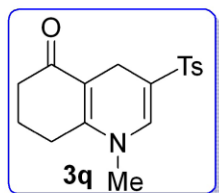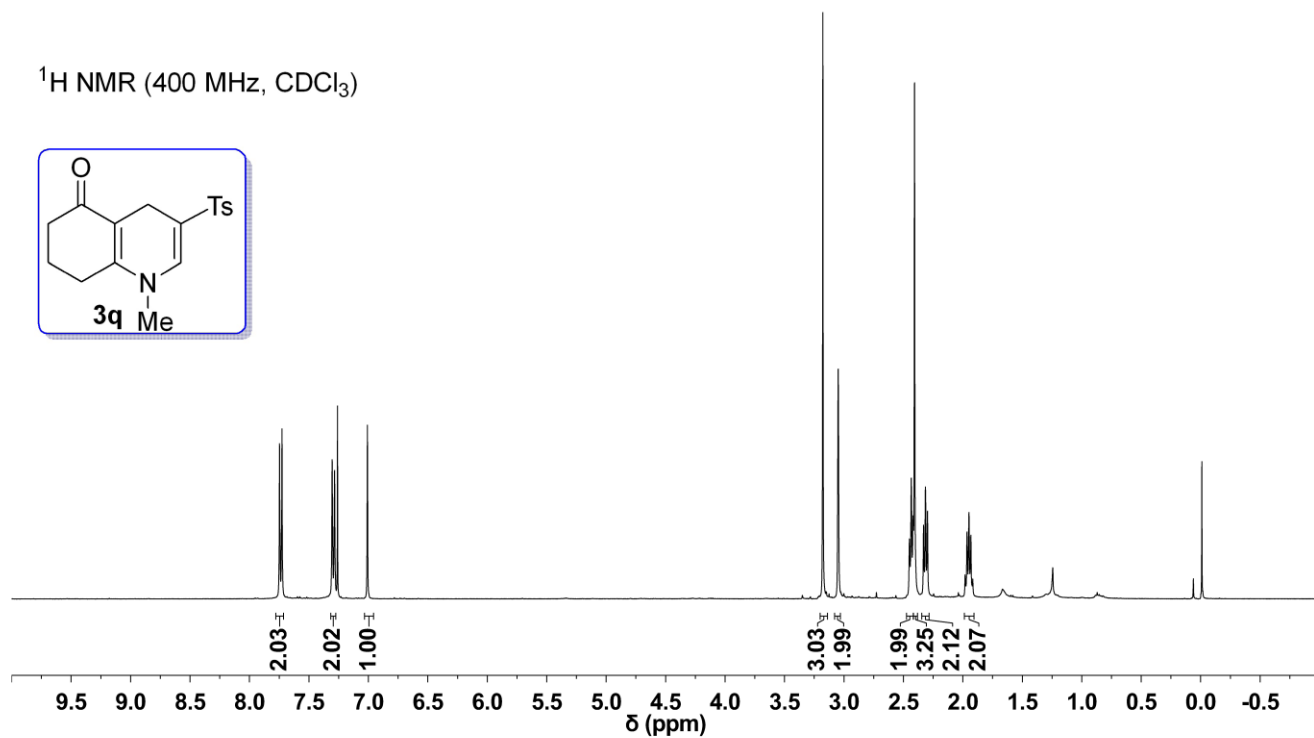

196.105

153.256  
144.194  
138.653  
135.989  
129.954  
128.165

114.916  
109.820

38.938  
36.015  
25.774  
21.818  
21.082  
20.167

$^{13}\text{C}$  NMR (101 MHz,  $\text{CDCl}_3$ )

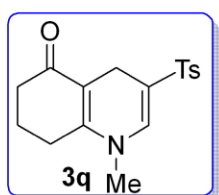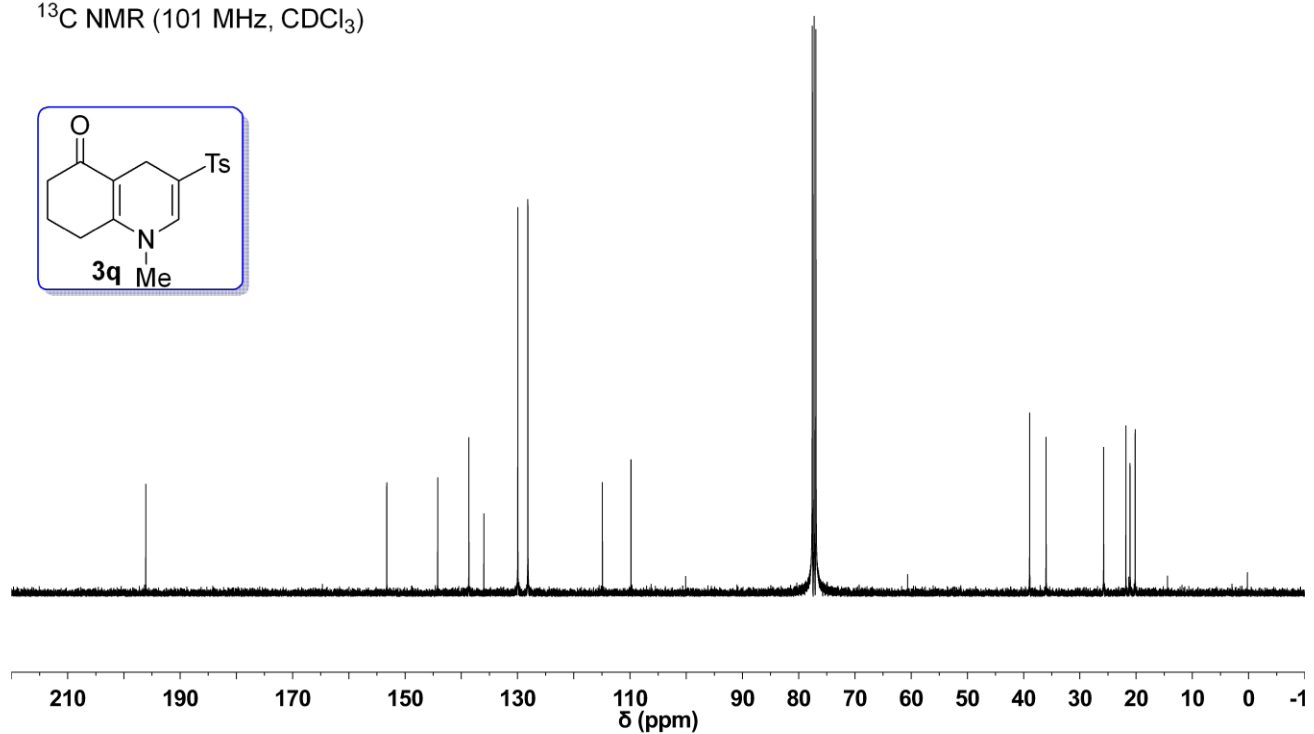

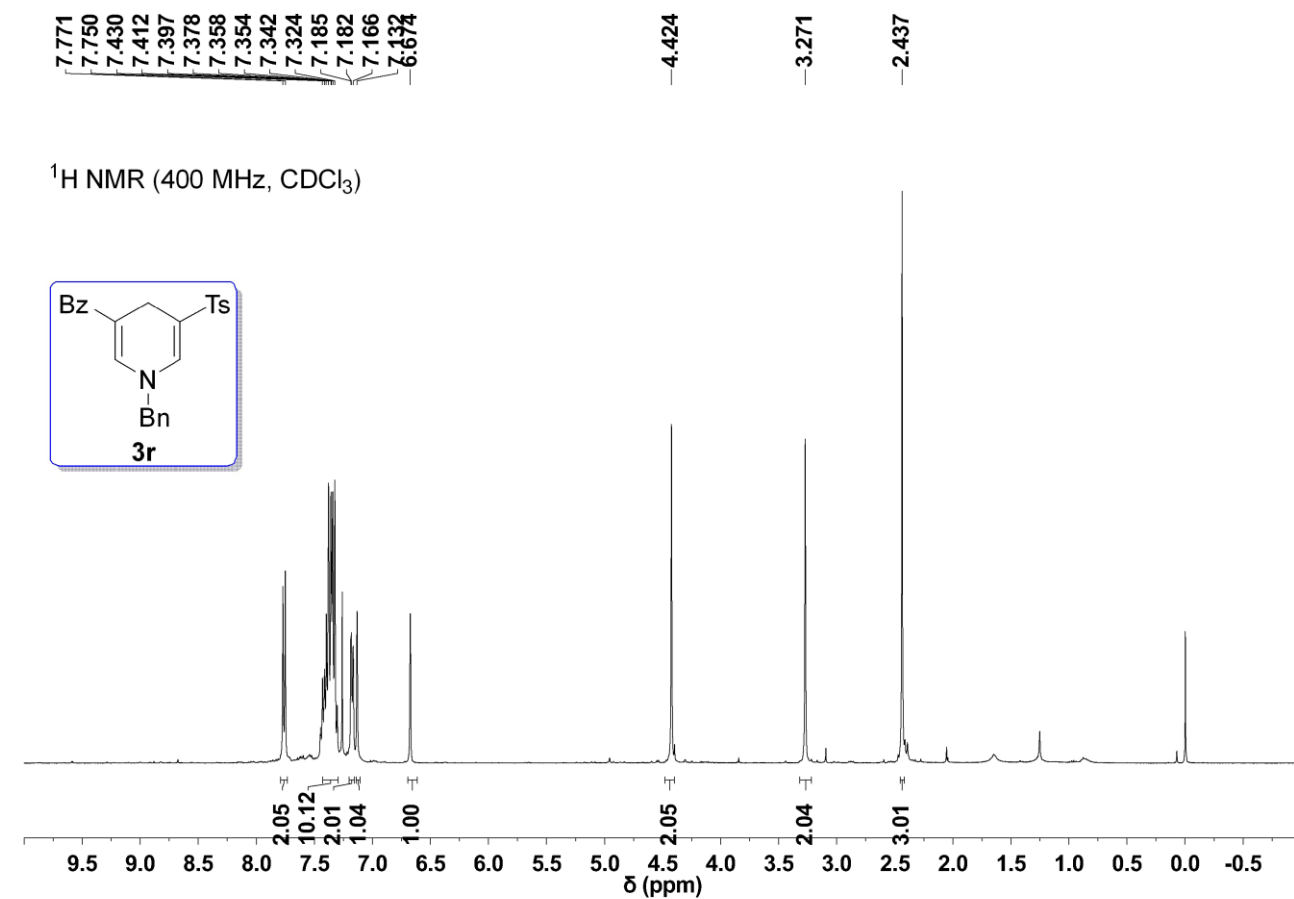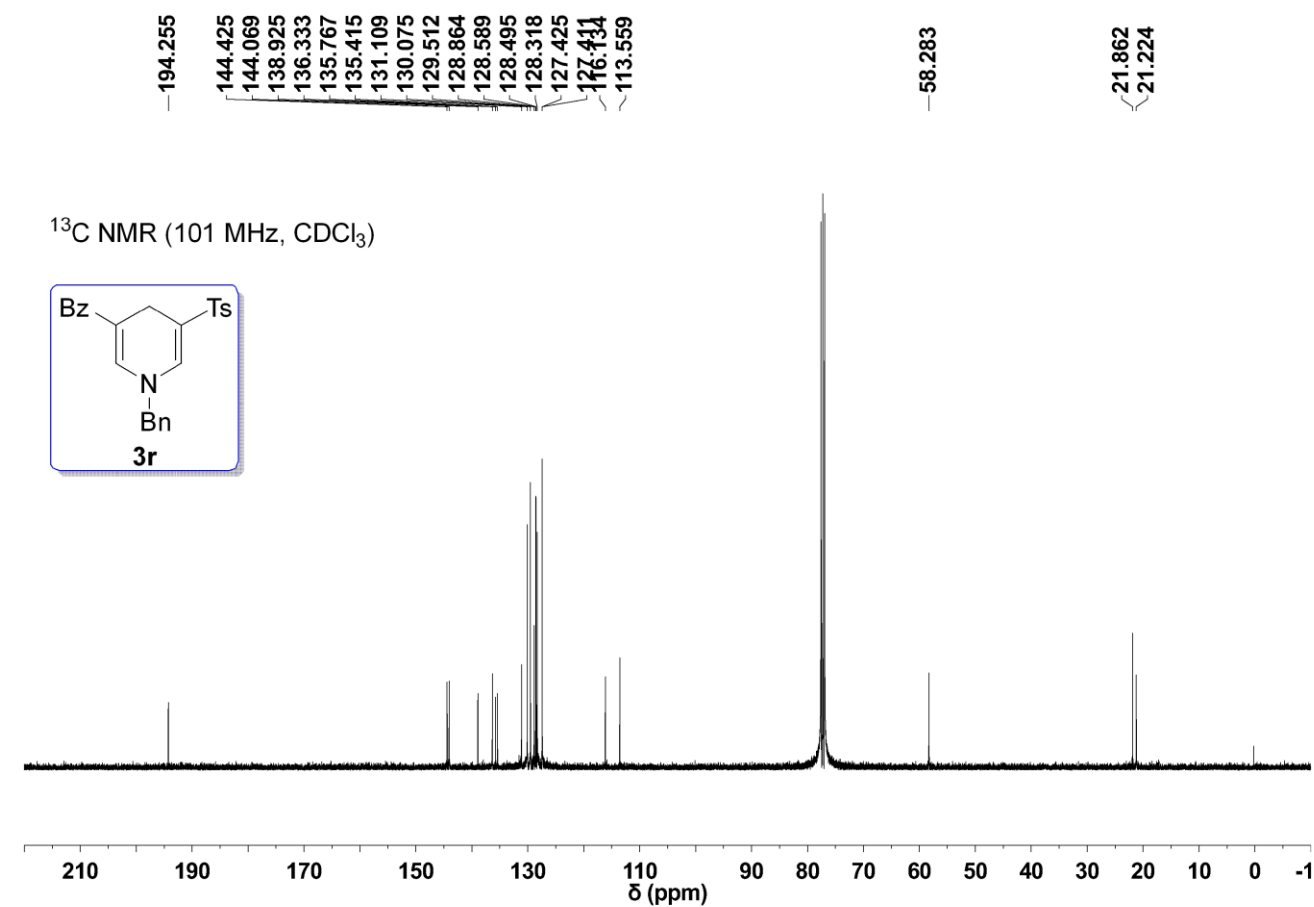

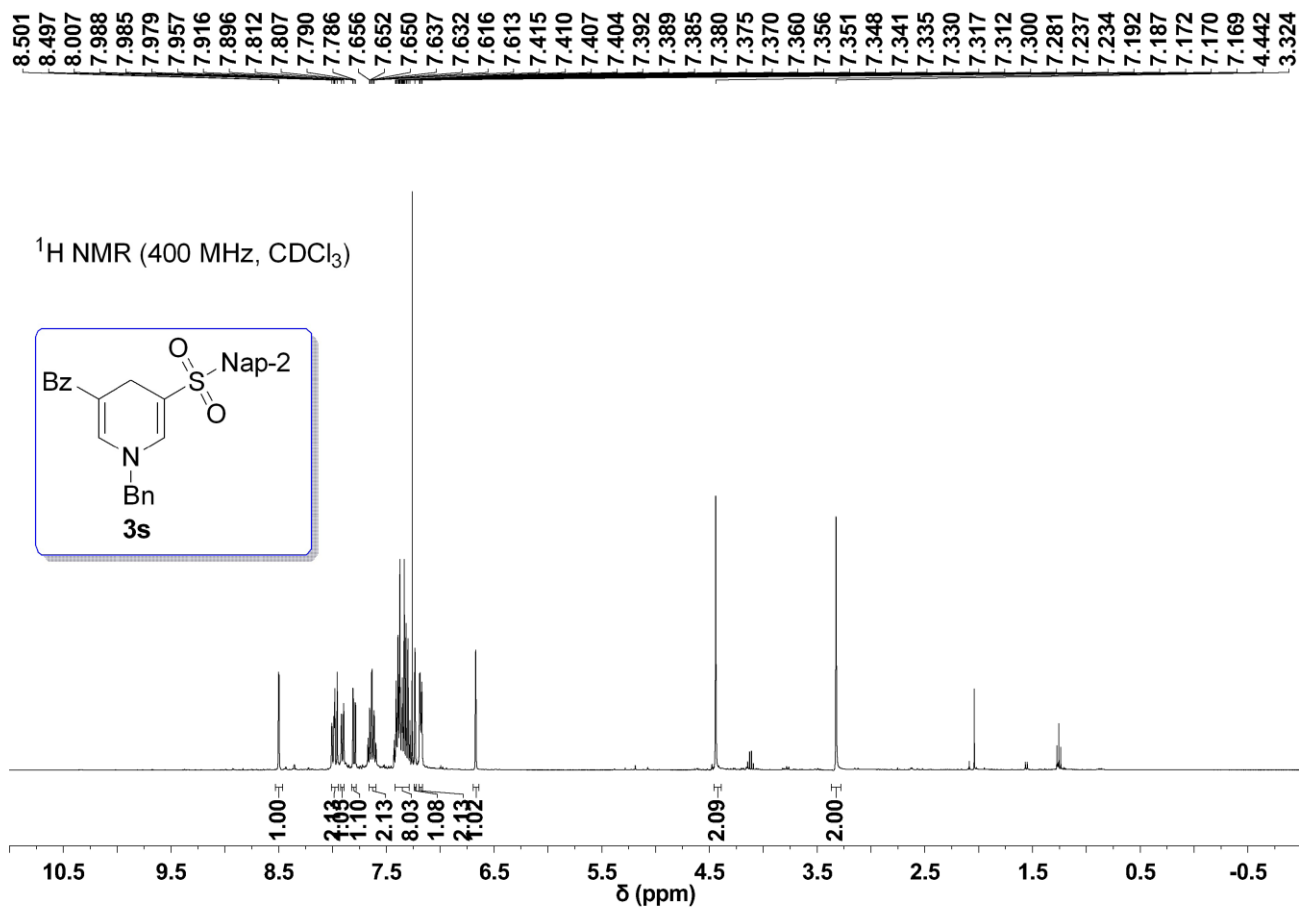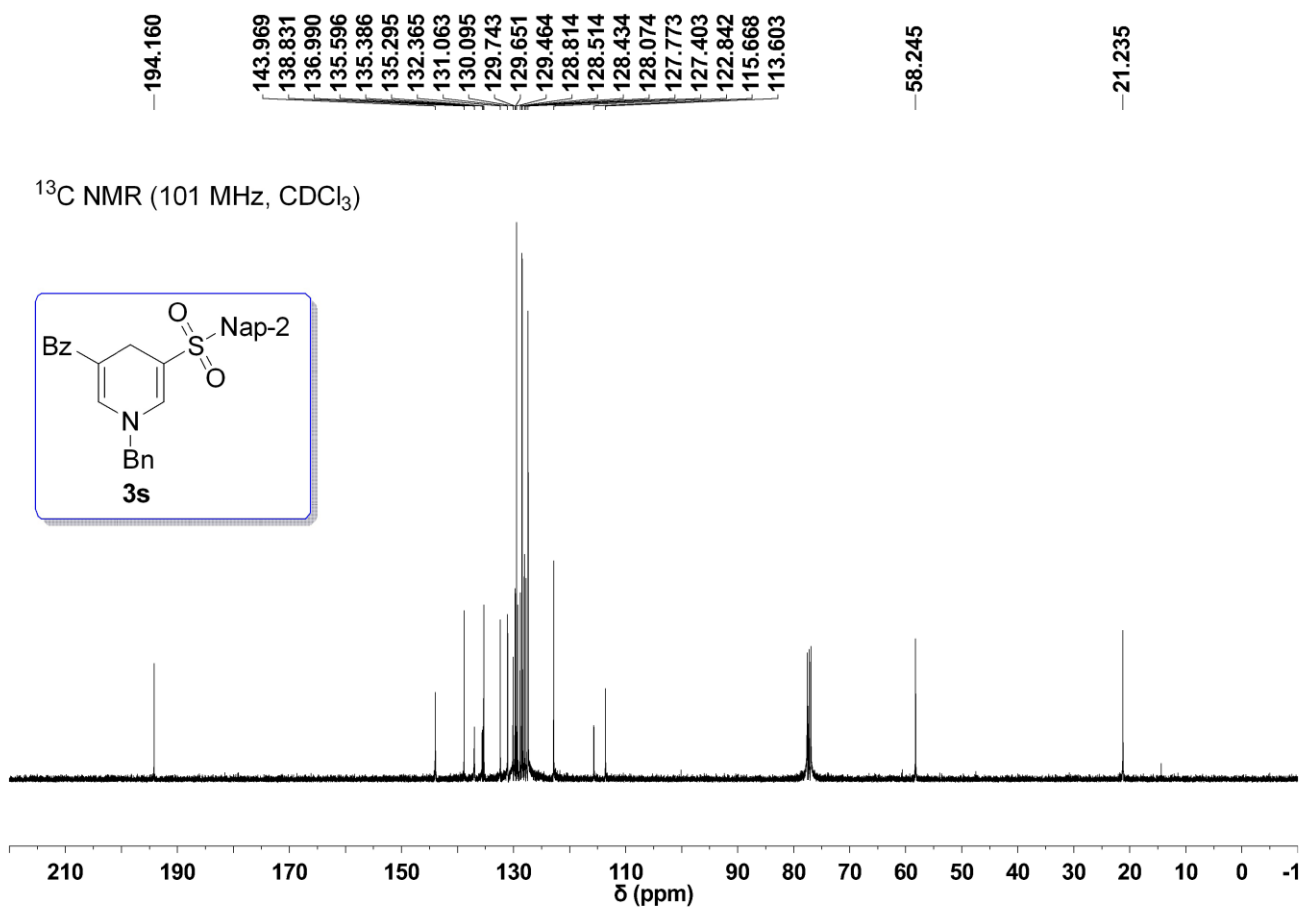

7.470  
7.452  
7.448  
7.431  
7.427  
7.402  
7.388  
7.386  
7.381  
7.376  
7.370  
7.367  
7.366  
7.364  
7.349  
7.349  
7.194  
7.190  
7.174  
7.171  
6.984  
6.981  
6.754  
6.752  
6.750  
6.746

3.548

2.932

$^1\text{H}$  NMR (400 MHz,  $\text{CDCl}_3$ )

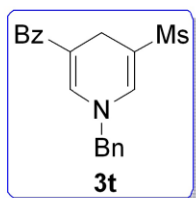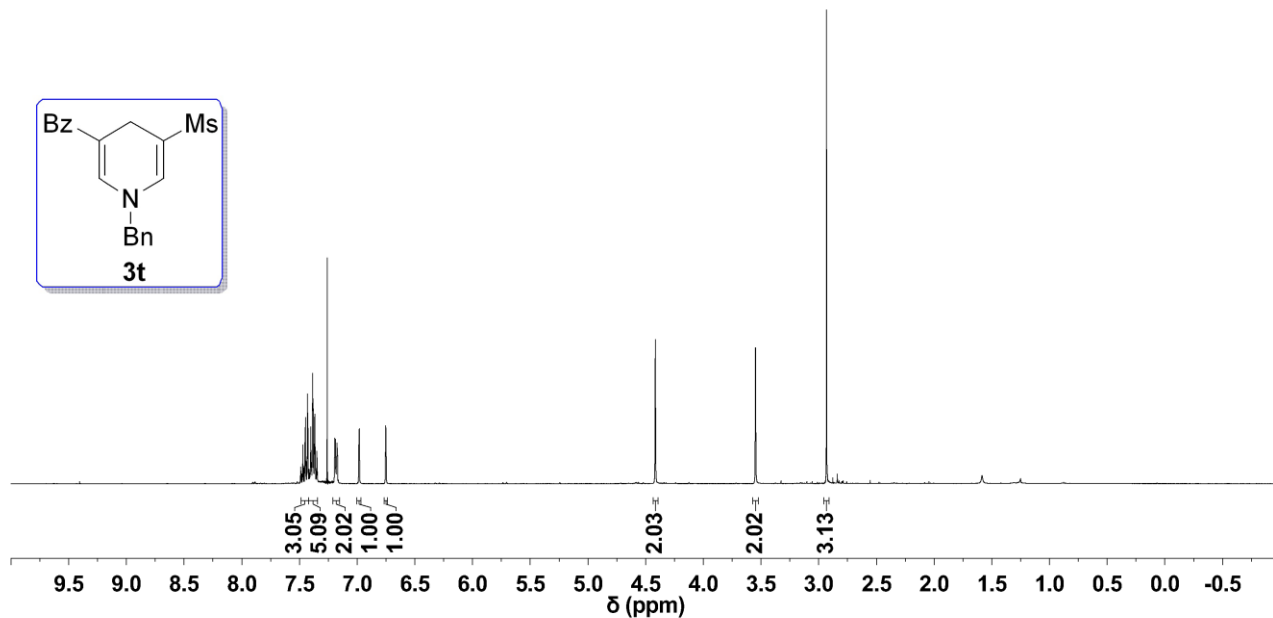

7.470  
7.452  
7.448  
7.431  
7.427  
7.402  
7.388  
7.386  
7.381  
7.376  
7.370  
7.367  
7.366  
7.364  
7.349  
7.349  
7.194  
7.190  
7.174  
7.171  
6.984  
6.981  
6.754  
6.752  
6.750  
6.746

3.548

2.932

$^1\text{H}$  NMR (400 MHz,  $\text{CDCl}_3$ )

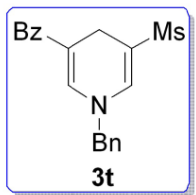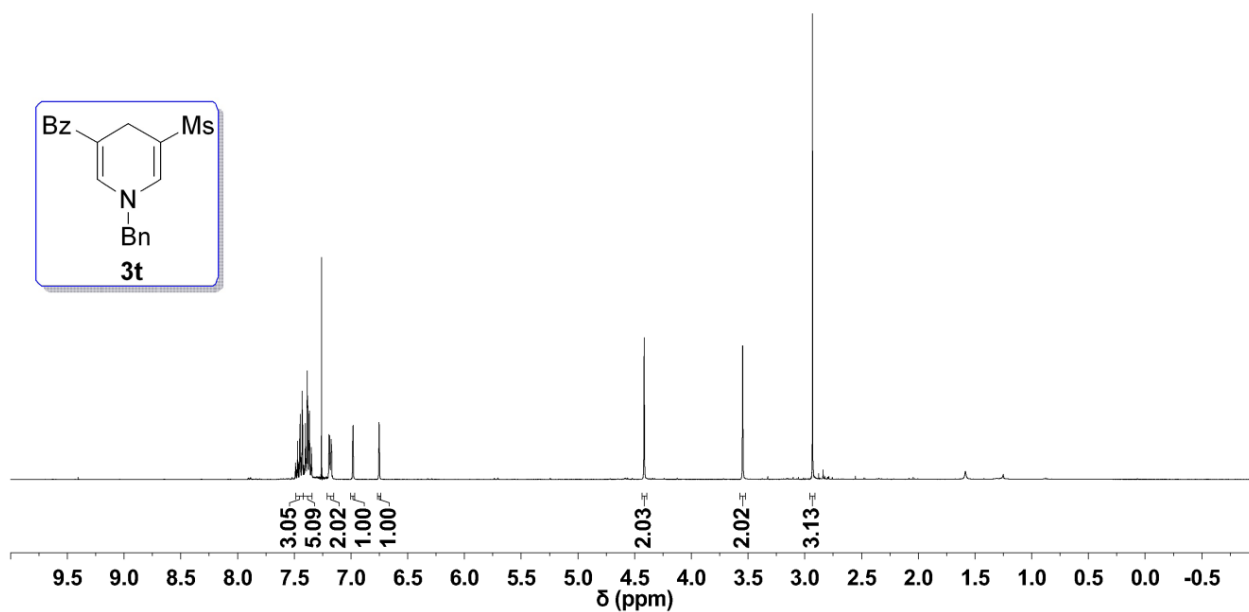

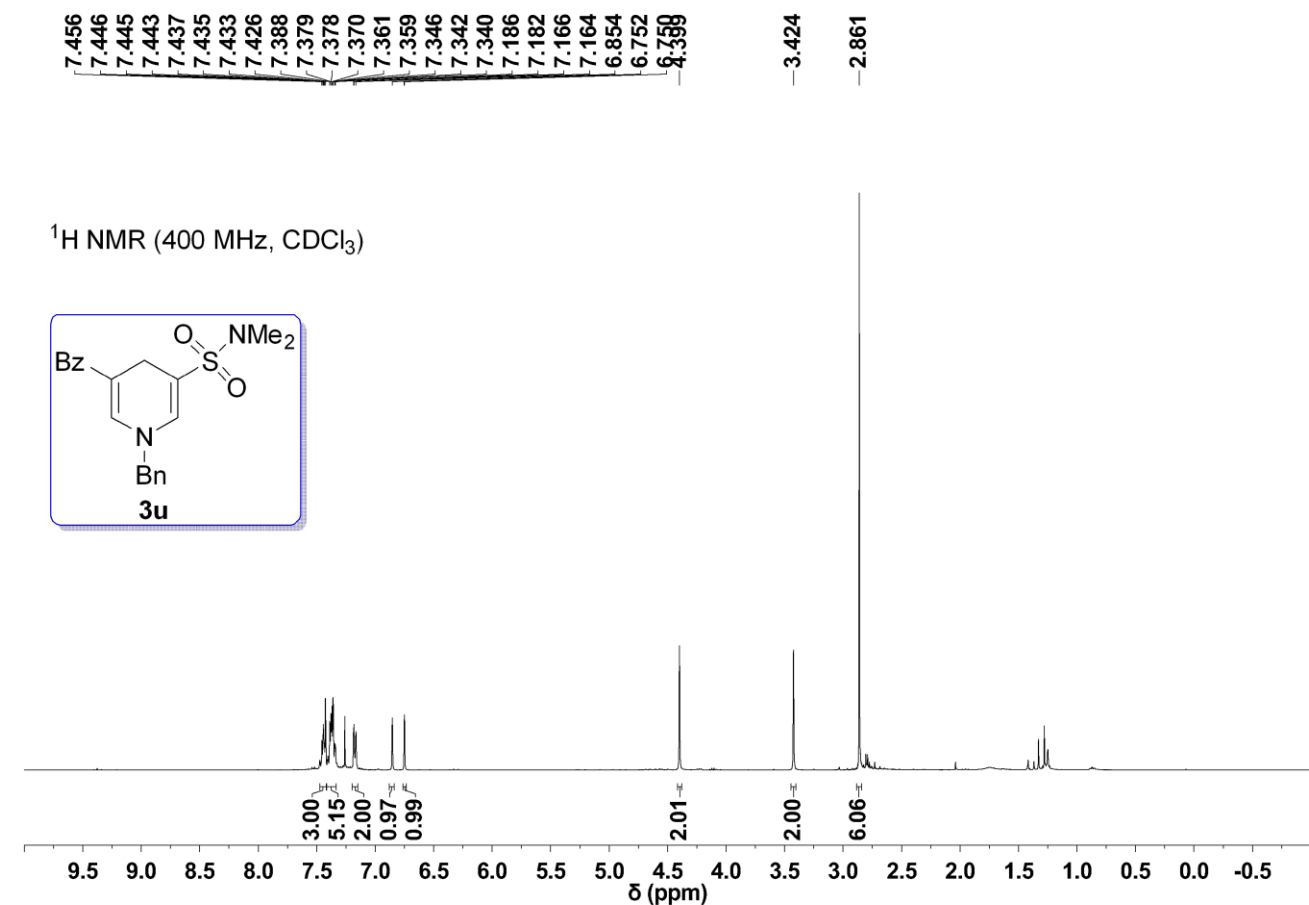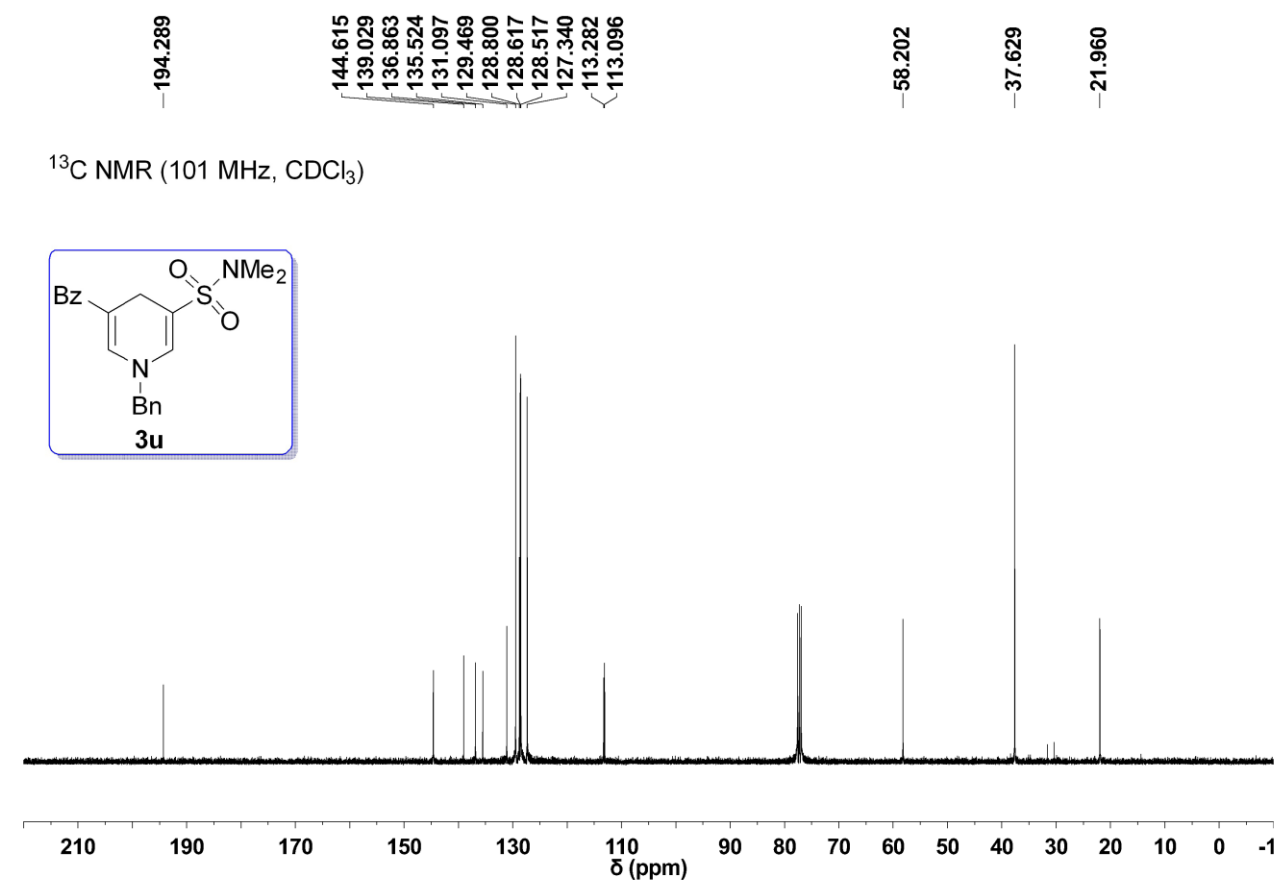

7.766  
7.749  
7.434  
7.431  
7.420  
7.374  
7.371  
7.363  
7.358  
7.355  
7.344  
7.340  
7.330  
7.324  
7.318  
7.314  
7.116  
7.114  
7.105  
7.101  
7.092  
7.088  
6.914  
6.909  
6.900  
6.896  
6.665  
6.648  
3.829  
3.257  
2.436

$^1\text{H}$  NMR (500 MHz,  $\text{CDCl}_3$ )

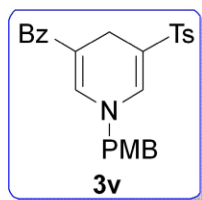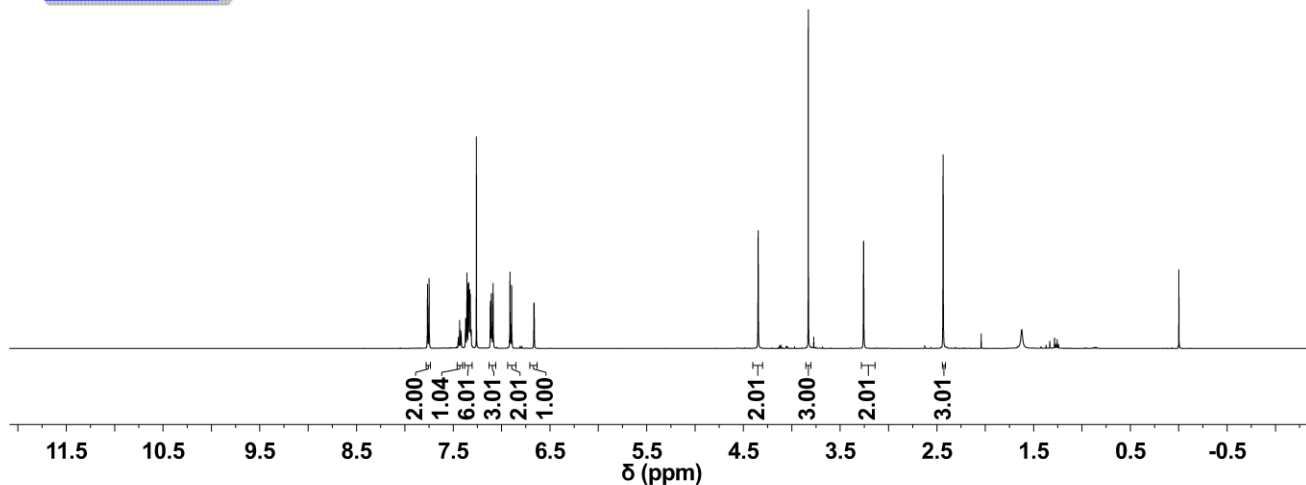

194.222  
160.111  
143.985  
131.056  
130.068  
129.052  
128.606  
128.476  
128.372  
128.072  
114.888  
113.484  
57.910  
55.636  
21.847  
21.306

$^{13}\text{C}$  NMR (126 MHz,  $\text{CDCl}_3$ )

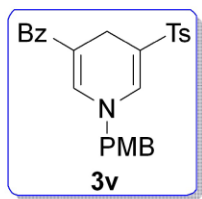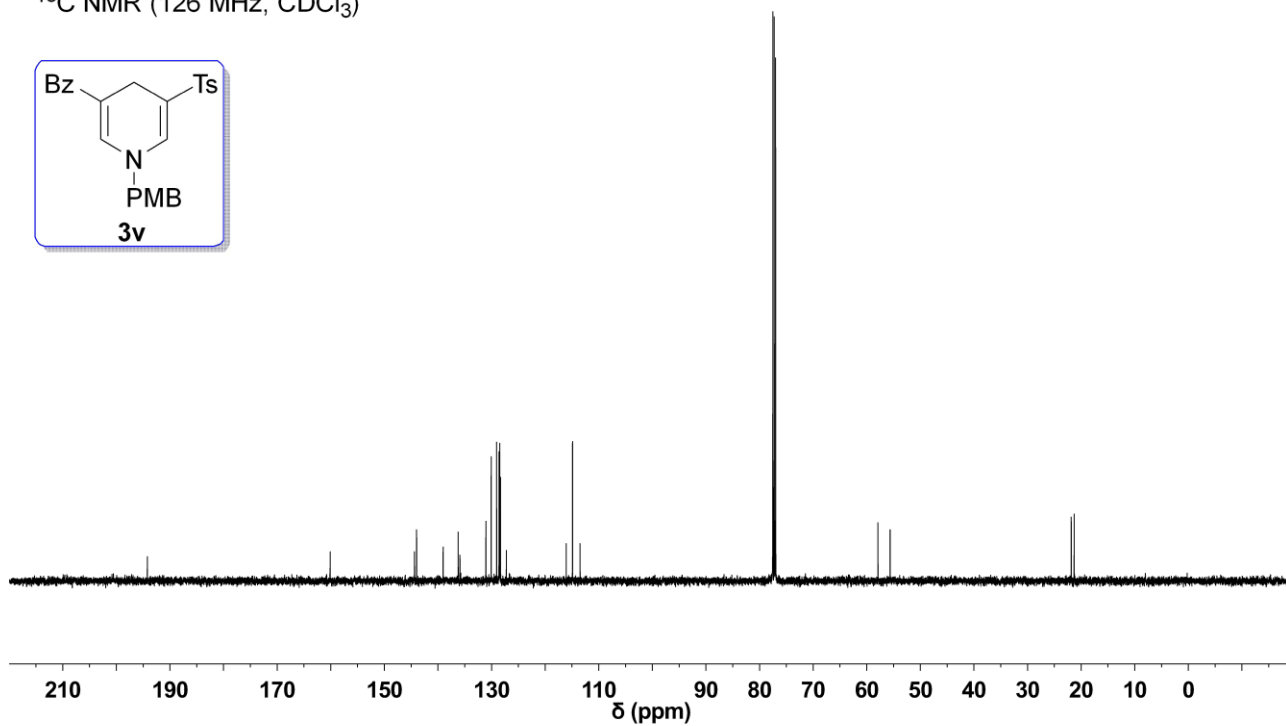



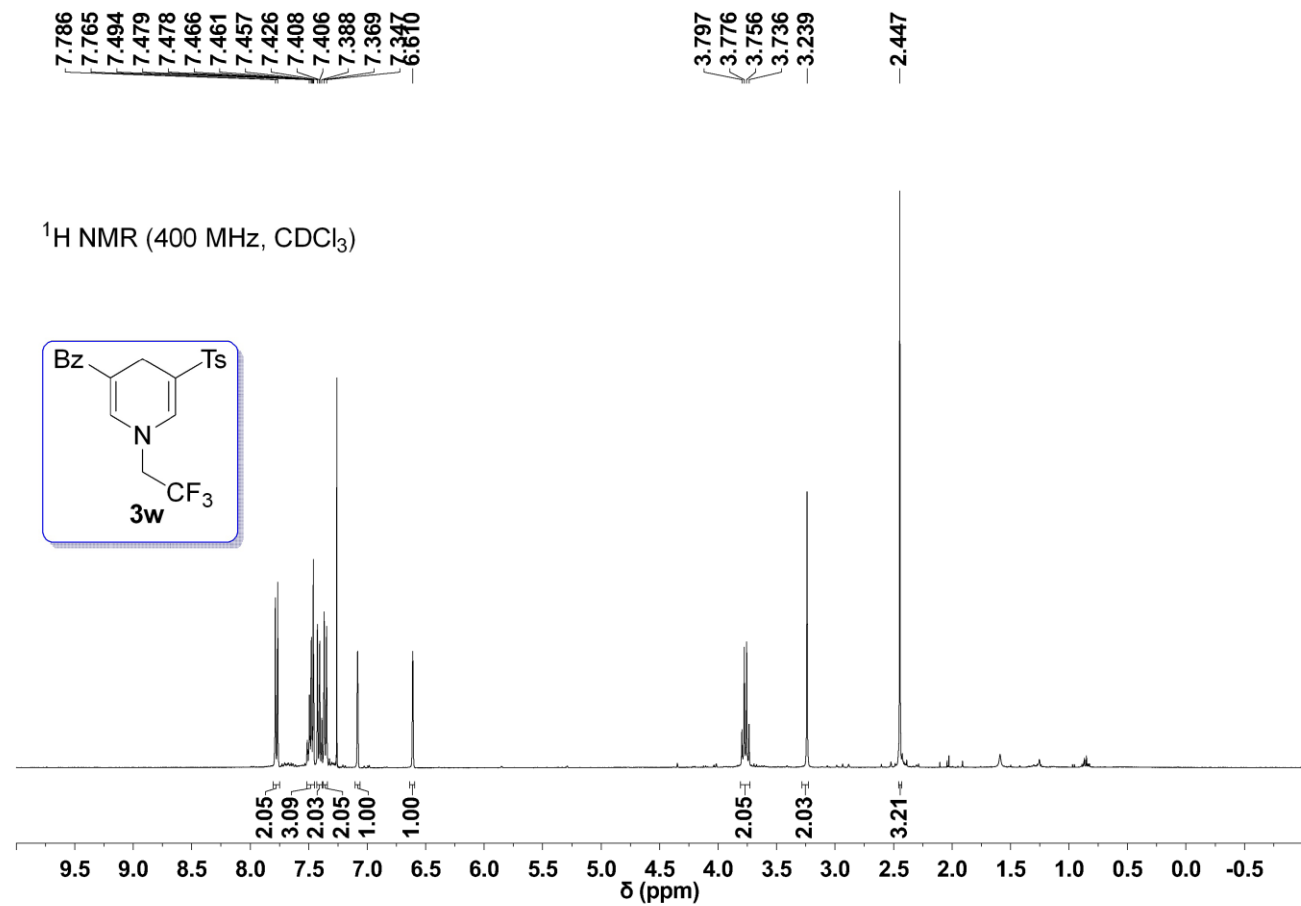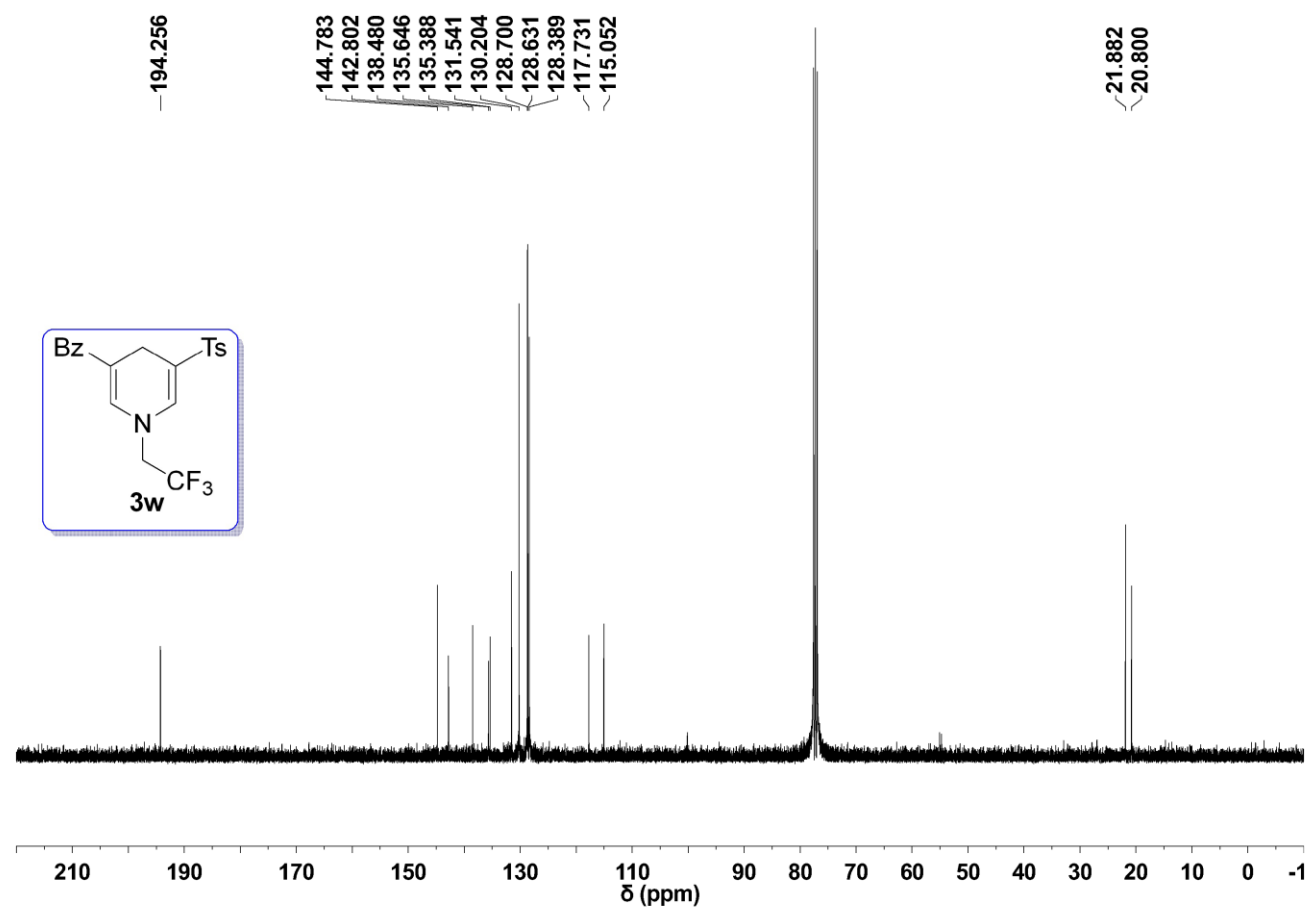

7.763  
7.743  
7.415  
7.411  
7.405  
7.394  
7.375  
7.370  
7.366  
7.342  
7.322  
7.300  
7.291  
7.287  
7.215  
7.211  
7.194  
6.685

4.622  
4.605  
4.587  
4.570

3.269

2.434

1.622  
1.605

$^1\text{H}$  NMR (400 MHz,  $\text{CDCl}_3$ )

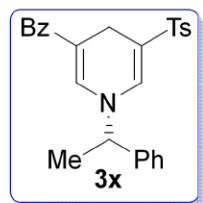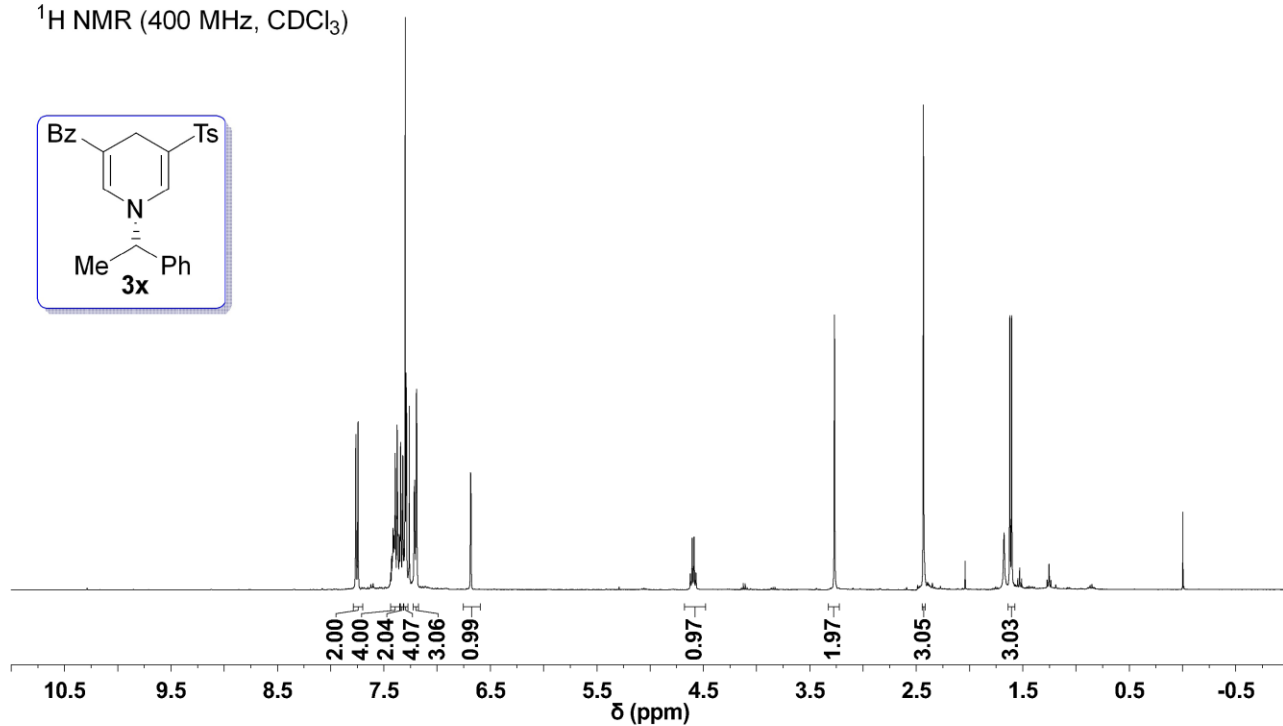

194.225  
144.351  
142.655  
139.456  
138.923  
135.856  
134.953  
131.060  
130.056  
129.423  
128.761  
128.592  
128.435  
128.315  
126.695  
126.681  
115.887  
113.376

62.451

21.858  
21.663  
19.832

$^{13}\text{C}$  NMR (101 MHz,  $\text{CDCl}_3$ )

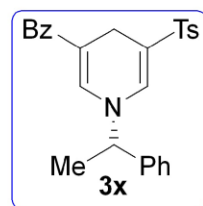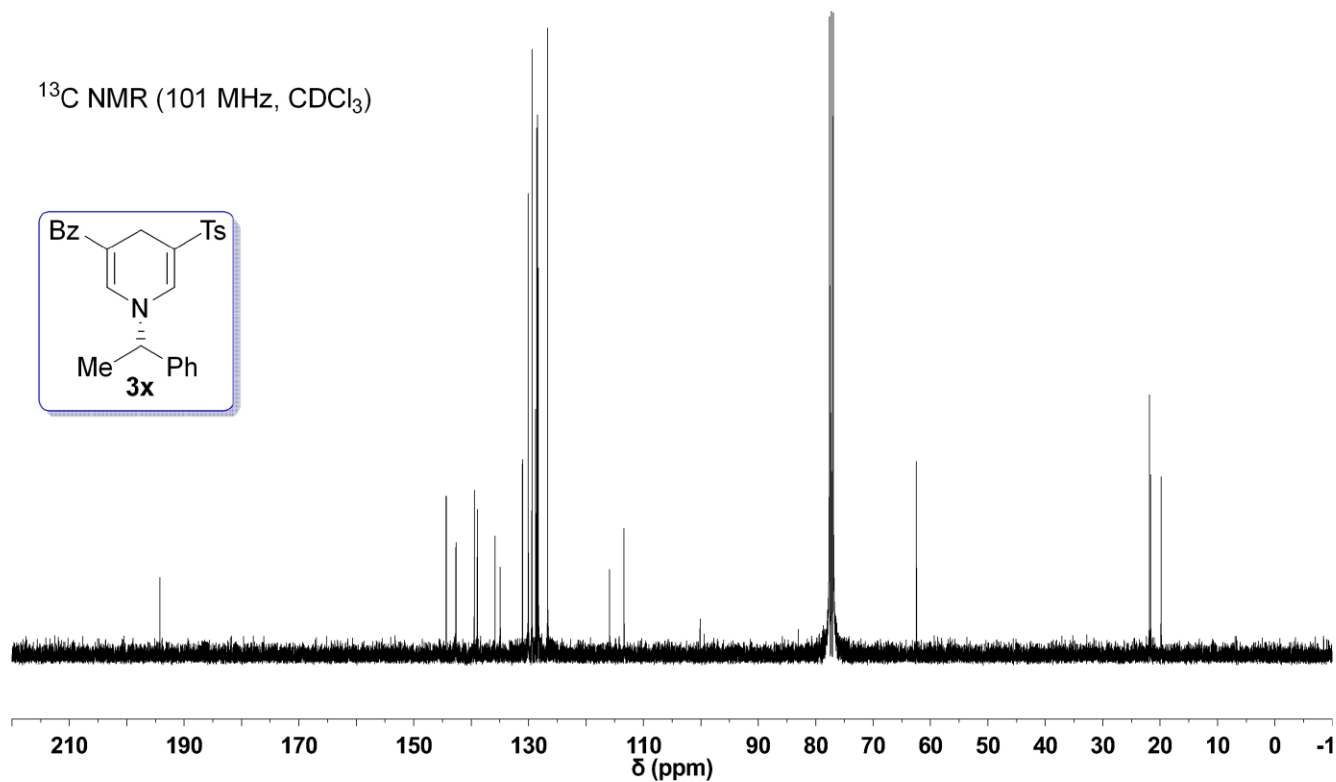

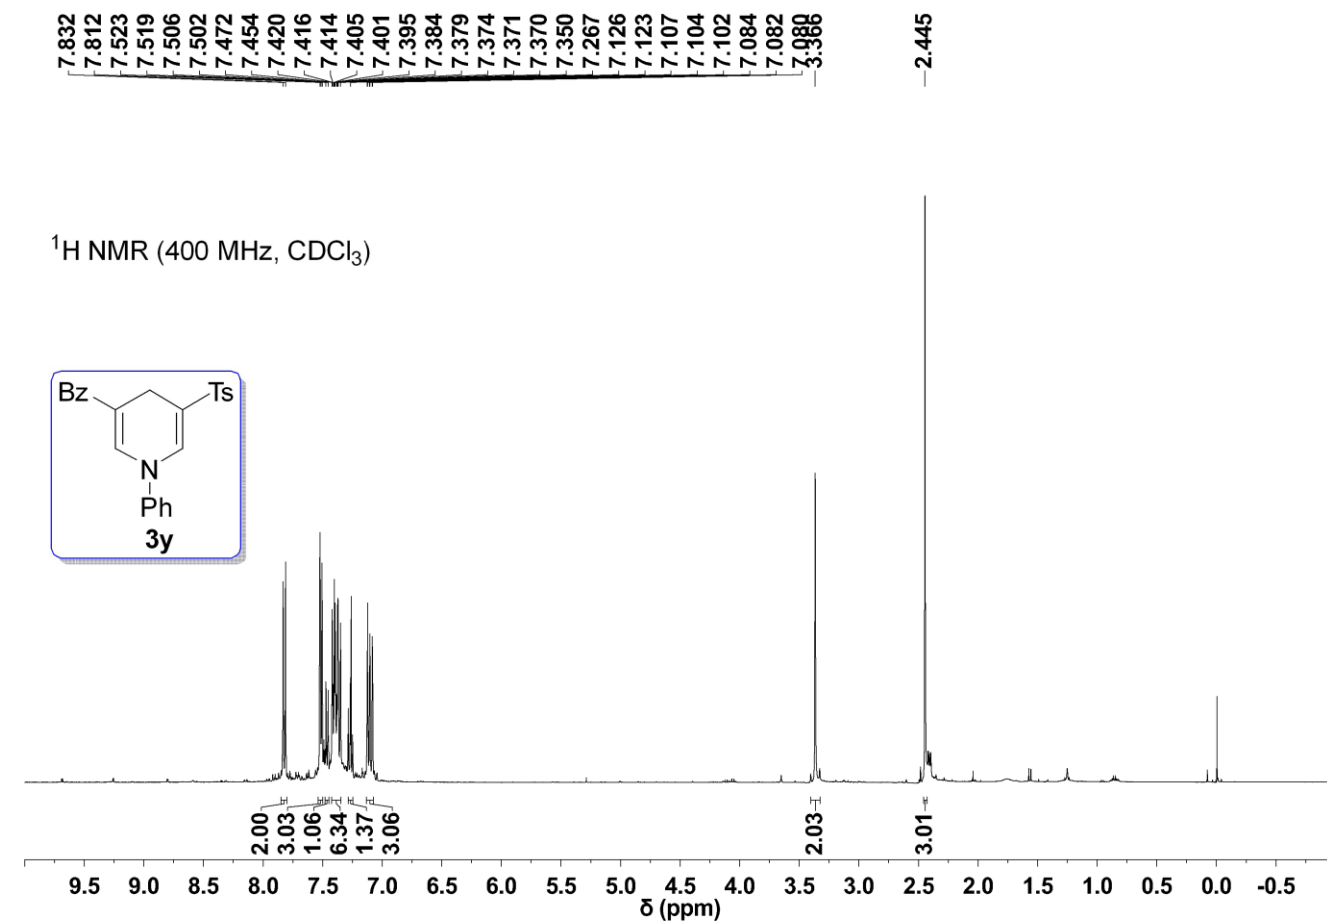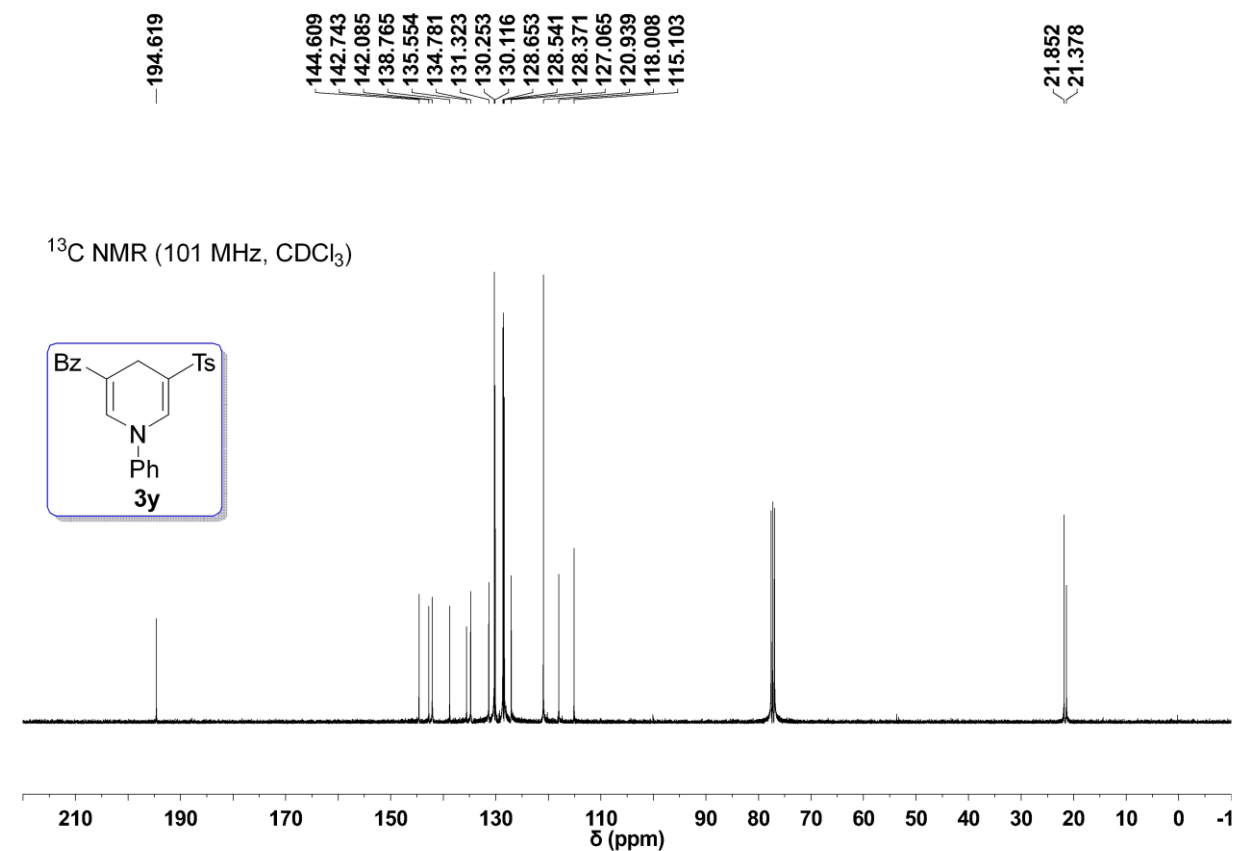

7.812  
7.796  
7.451  
7.435  
7.387  
7.372  
7.357  
7.320  
7.304  
7.164  
6.601  
3.870  
3.857  
3.844  
3.831  
3.176  
2.423  
1.087  
1.074

$^1\text{H}$  NMR (500 MHz,  $\text{CDCl}_3$ )

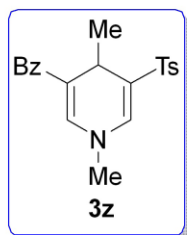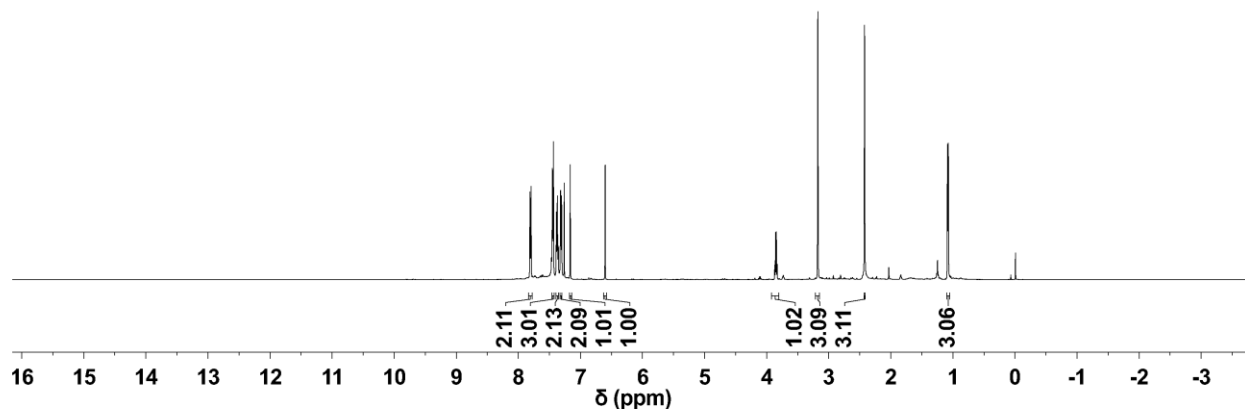

193.932

143.999  
143.195  
139.369  
137.783  
137.602  
130.795  
129.857  
128.257  
128.237  
127.833  
119.689  
118.621

41.767

25.995  
23.187  
21.634

$^{13}\text{C}$  NMR (126 MHz,  $\text{CDCl}_3$ )

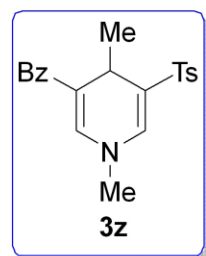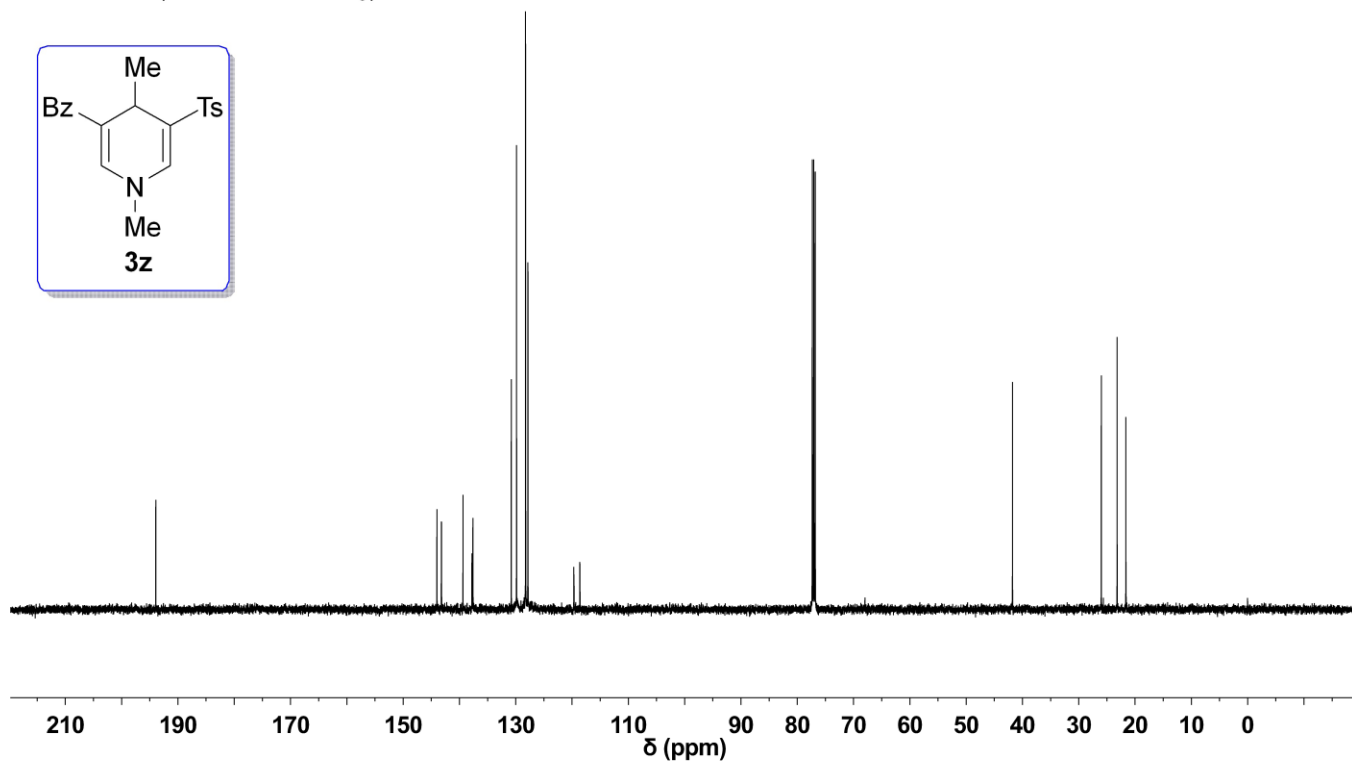

7.738 7.721 7.386 7.381 7.379 7.375 7.373 7.365 7.346 7.335 7.329 7.323 7.318 7.314 7.309 7.307 7.296 7.114 7.111 7.093

4.297 4.267 4.238 4.208

3.354 3.348 3.345 3.345 2.893 2.888 2.865 2.859 2.856 2.551 2.531 2.519 2.508 2.499 2.407

$^1\text{H}$  NMR (500 MHz,  $\text{CDCl}_3$ )

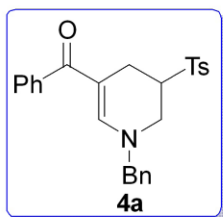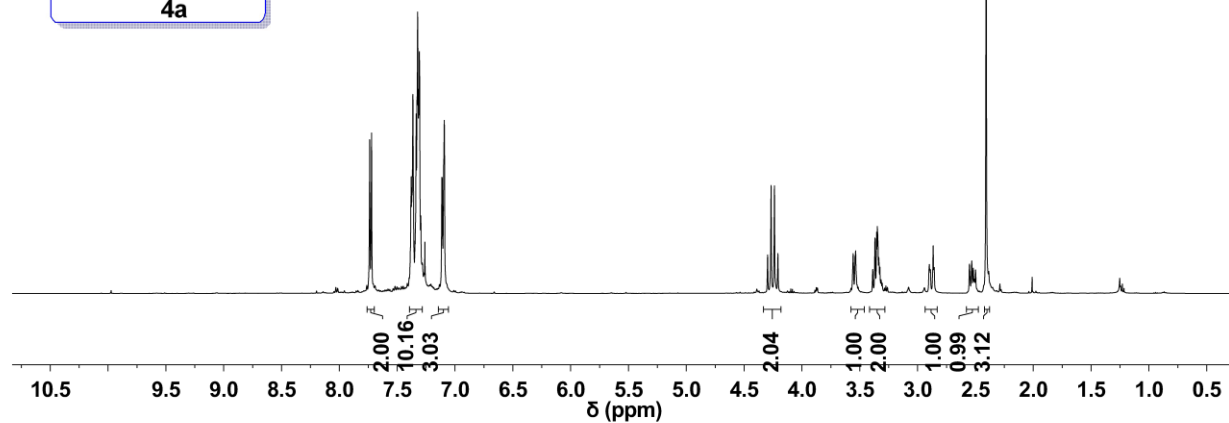

192.757

151.078 145.382 140.231 135.085 133.953 130.049 129.859 129.114 128.915 128.448 128.223 128.103 127.586 105.542

60.158 57.540

44.141

21.682 20.792

$^{13}\text{C}$  NMR (126 MHz,  $\text{CDCl}_3$ )

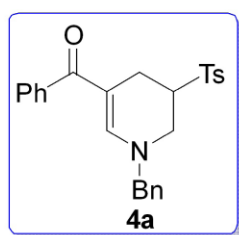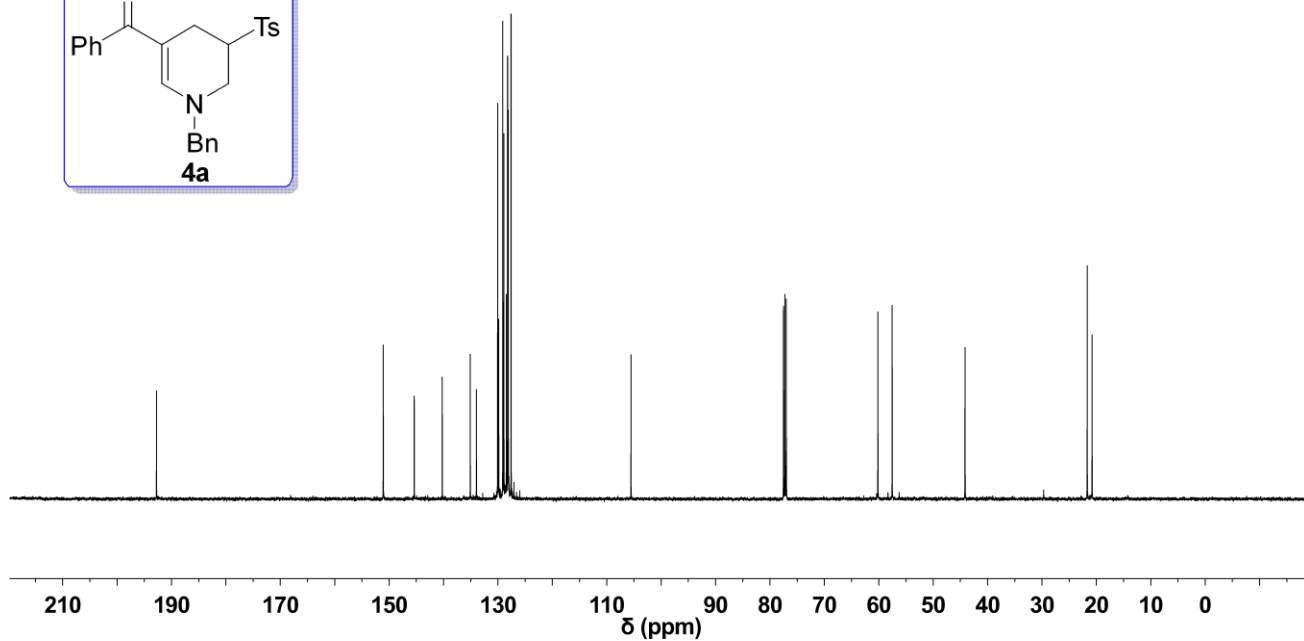

9.140  
9.136  
8.844  
8.842  
8.841  
8.356  
8.352  
8.348  
7.853  
7.837  
7.486  
7.483  
7.477  
7.472  
7.469  
7.460  
7.449  
7.355  
7.339

2.420

$^1\text{H}$  NMR (500 MHz,  $\text{CDCl}_3$ )

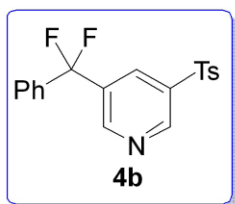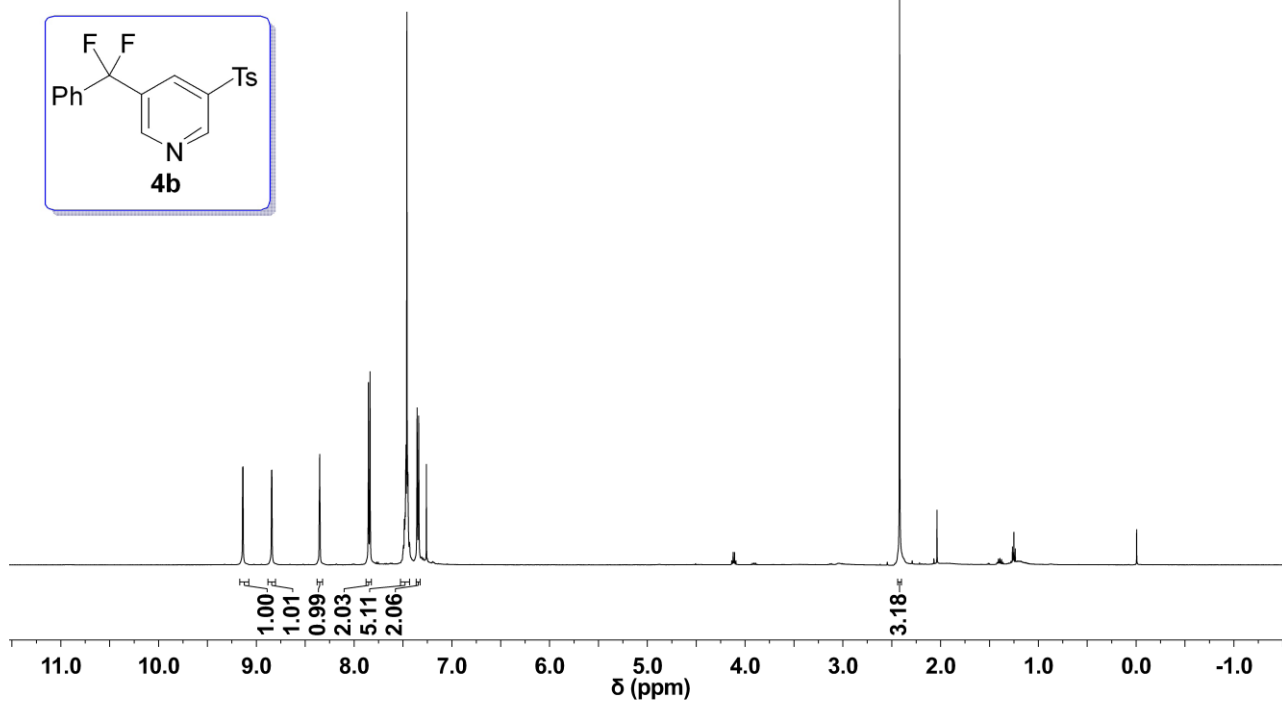

151.242  
151.198  
151.155  
149.959  
145.626  
138.943  
137.429  
135.887  
135.668  
135.450  
134.746  
134.506  
134.265  
132.636  
132.594  
132.553  
131.027  
130.599  
129.148  
128.184  
125.787  
125.742  
125.698  
121.224  
119.284  
117.345

21.861

$^{13}\text{C}$  NMR (126 MHz,  $\text{CDCl}_3$ )

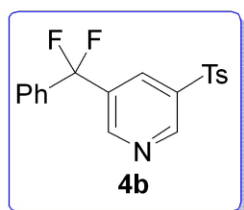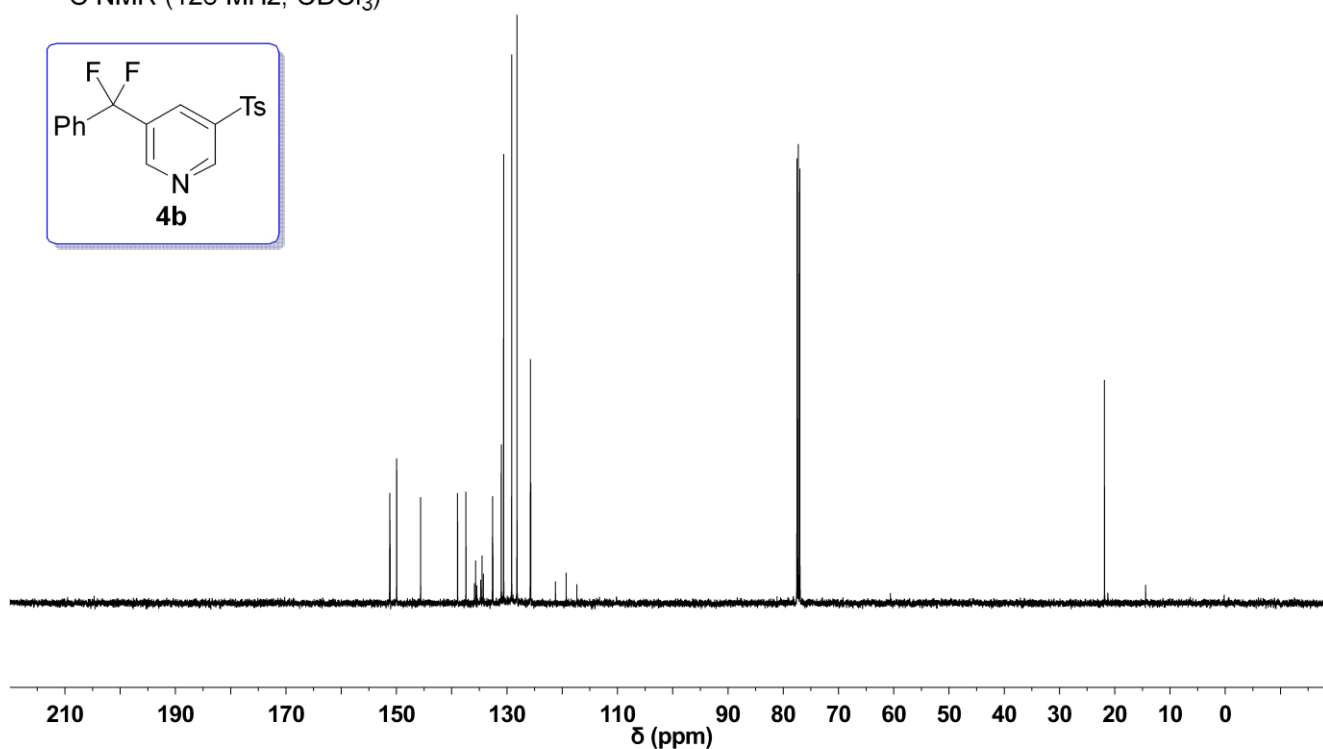

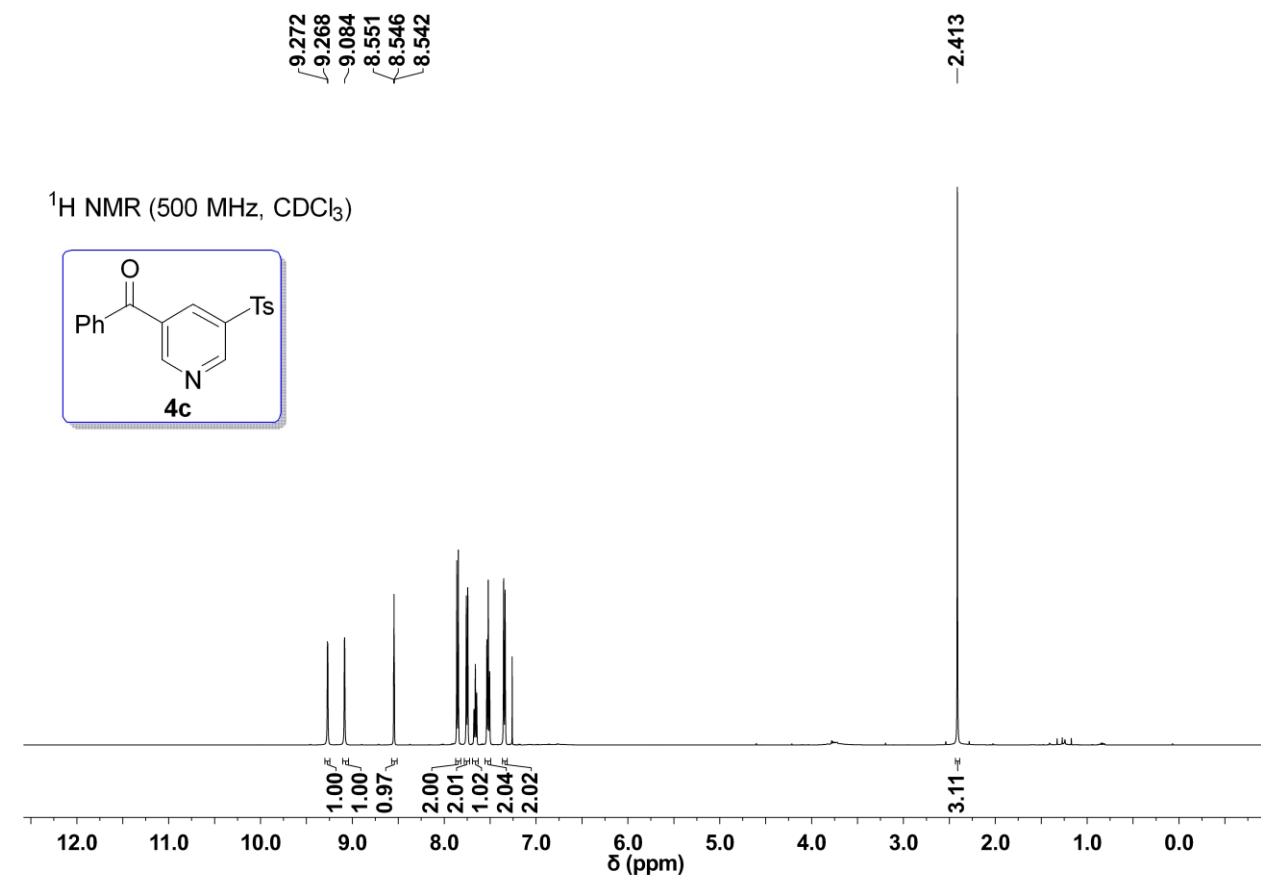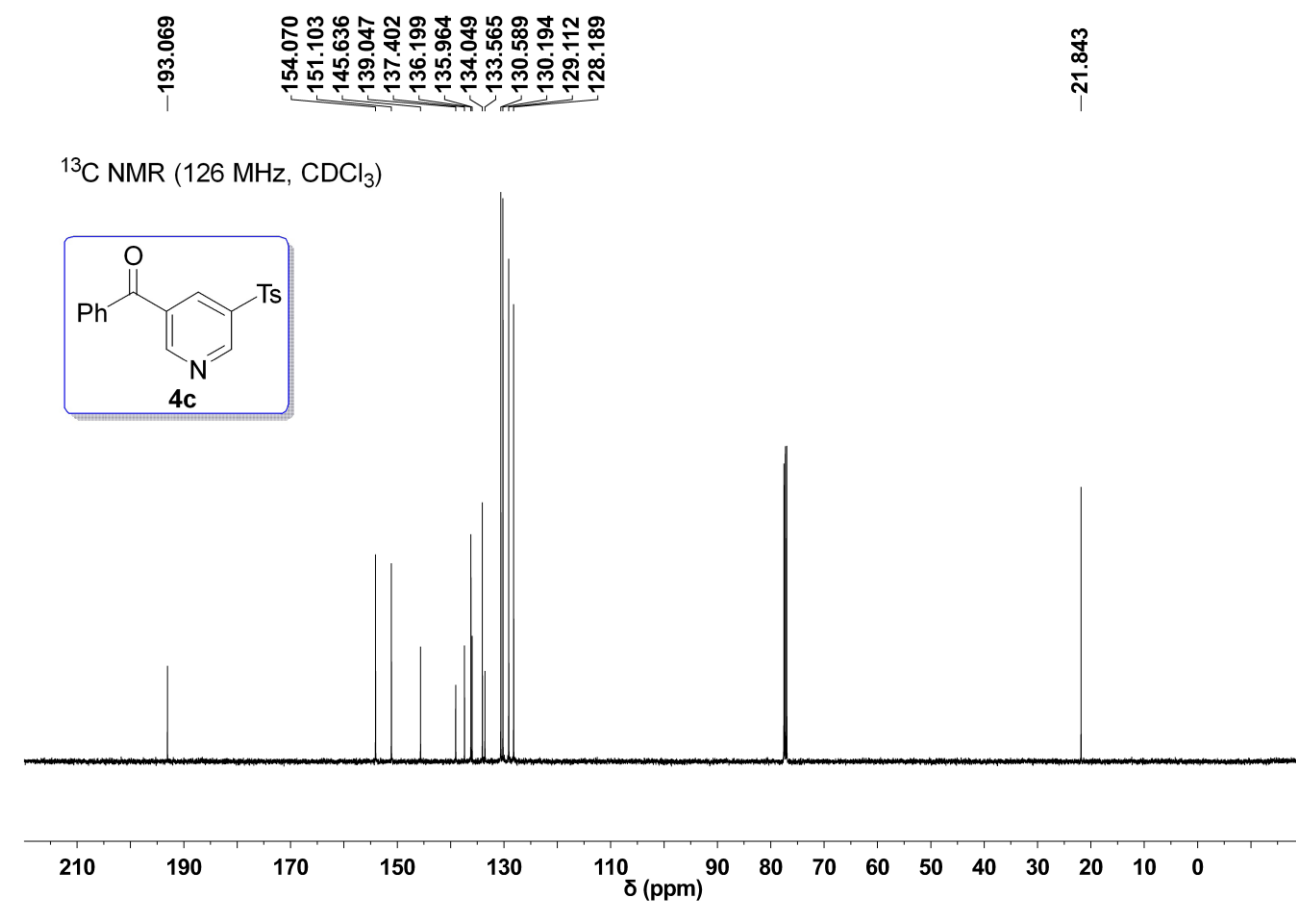

8.015 7.999 7.726 7.711 7.606 7.592 7.578 7.576 7.505 7.490 7.475 7.331 7.315 7.230 7.215 6.914 6.898 6.897 4.648 4.640 4.625 4.618 4.611 4.602 3.836 3.637 3.611 3.449 3.422 3.412 3.385 3.208 3.013 3.009 2.984 2.980 2.510 2.484 2.447 2.422 2.326 2.300 2.296 2.290 2.278

$^1\text{H}$  NMR (500 MHz,  $\text{CDCl}_3$ )

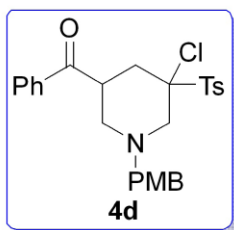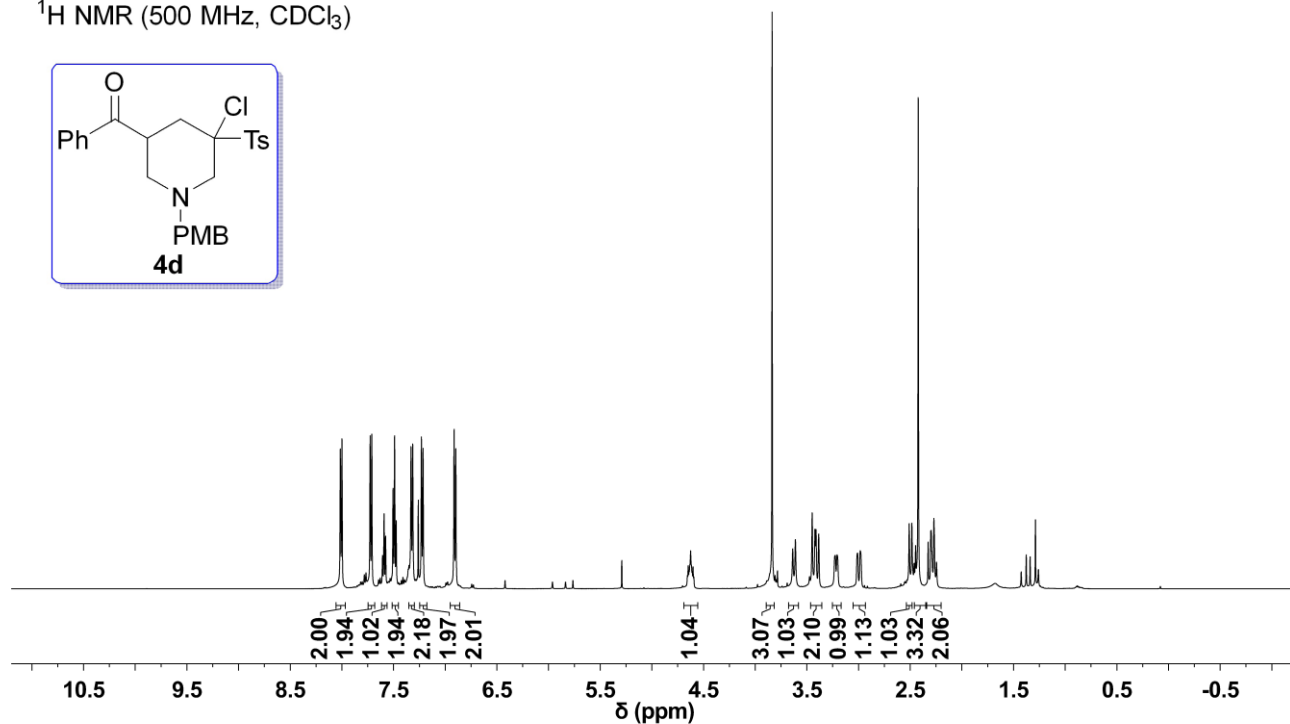

199.974 159.332 145.661 131.218 130.708 129.500 129.114 128.769 128.033 81.941 61.853 60.779 55.507 55.194 42.564 36.630 21.919

$^{13}\text{C}$  NMR (126 MHz,  $\text{CDCl}_3$ )

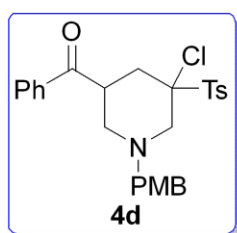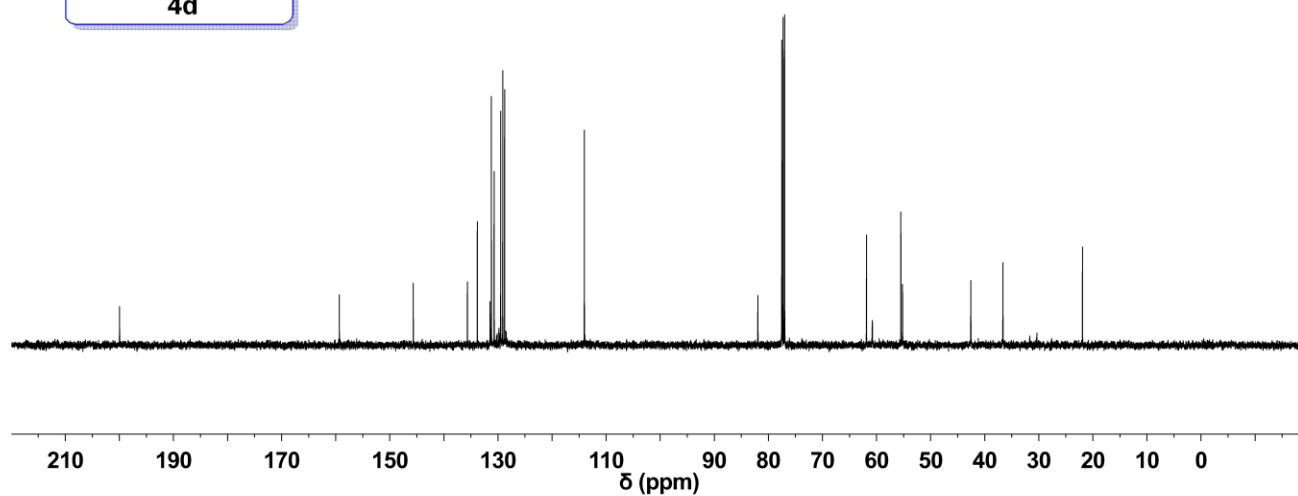

Supplement: d3qo01681a1.pdf [file d3qo01681a1.pdf]
